# Supplementary material
Source: publisher site journal article supplement (https://www.spandidos-publications.com/6328/downloadSupplementary)
Supplement: Supplementary file 1 [file downloadSupplementary]

## Sheet: Supplementary Table S1
Table SI. Raw analysis data of GWAS analysis in psoriasis.
#CHROM	ID	REF	ALT	A1	OR	L95	U95	p-value	Alt-frequencies	Gene Symbol	Entrez Gene Name	Gene and psoriasis association
6	rs1634774	A	G	G	1.63804	1.53147	1.75203	7.19401e-47	0.3231	-	-
6	rs9380151	T	C	C	1.83901	1.68662	2.00516	2.4029e-43	0.1131	-	-
6	rs9368611	A	C	C	1.86027	1.70314	2.03189	3.09216e-43	0.1069	-	-
6	rs75791723	C	T	T	1.83198	1.67868	1.9993	5.47846e-42	0.111	-	-
6	rs4997405	C	T	C	1.59258	1.48818	1.70431	3.00146e-41	0.4834	-	-
6	rs2596521	A	G	G	1.57707	1.47538	1.68577	6.38001e-41	0.3929	-	-
6	rs9391847	A	G	G	1.5775	1.47547	1.68657	9.99203e-41	0.3969	-	-
6	rs2523624	G	A	A	1.57501	1.47346	1.68355	1.04514e-40	0.3924	-	-
6	rs3132482	G	A	A	0.629616	0.587658	0.674571	1.74682e-39	0.4778	-	-
6	rs9263986	A	G	A	1.5727	1.47001	1.68255	1.86245e-39	0.4767	-	-
6	rs3868082	A	G	G	0.635701	0.593746	0.680621	1.15081e-38	0.4974	-	-
6	rs9393991	G	A	A	1.77937	1.63102	1.9412	1.69939e-38	0.1139	TRIM40	tripartite motif containing 40
6	rs117565607	T	A	A	1.781	1.63197	1.94364	2.51151e-38	0.113	TRIM26	tripartite motif containing 26
6	rs6927080	C	G	C	1.55827	1.45643	1.66723	7.27629e-38	0.4841	-	-
6	rs9391681	T	C	C	1.78324	1.63266	1.94772	8.59221e-38	0.1103	-	-
6	rs117416277	T	C	C	1.77288	1.62411	1.93527	1.53424e-37	0.1129	-	-
6	rs3132484	G	T	T	0.630124	0.586982	0.676437	2.63978e-37	0.4317	-	-
6	rs3132483	G	A	A	0.630124	0.586982	0.676437	2.63978e-37	0.4317	-	-
6	rs3132485	C	A	A	0.630146	0.587004	0.676459	2.65345e-37	0.4317	-	-
6	rs12194291	G	C	C	1.72481	1.58611	1.87564	3.35545e-37	0.1346	-	-
6	rs150971595	C	T	T	1.8139	1.65357	1.98977	1.81482e-36	0.0976	GABBR1	gamma-aminobutyric acid type B receptor subunit 1	Novel
6	rs6457375	G	A	A	0.631727	0.588032	0.67867	3.53784e-36	0.4157	LINC02571	long intergenic non-protein coding RNA 2571
6	rs2524058	A	G	G	0.635509	0.59209	0.682113	3.72445e-36	0.4379	-	-
6	rs28732140	G	A	A	1.75019	1.60319	1.91068	7.06645e-36	0.1088	-	-
6	rs3130693	T	C	C	0.634785	0.590936	0.681889	1.50591e-35	0.4161	-	-
6	rs6930376	A	T	T	0.63491	0.591059	0.682014	1.56755e-35	0.416	-	-
6	rs1811198	G	T	T	1.74795	1.6006	1.90885	1.81098e-35	0.1085	-	-
6	rs28895006	C	G	G	1.74915	1.60143	1.9105	2.02526e-35	0.108	-	-
6	rs6925809	T	C	C	1.74177	1.595	1.90205	4.57963e-35	0.1086	-	-
6	rs28629780	T	C	C	1.74154	1.59453	1.90209	6.27978e-35	0.1077	-	-
6	rs2844605	A	C	C	0.647184	0.603907	0.693562	6.87232e-35	0.4642	-	-
6	rs2844606	A	G	G	0.647278	0.603991	0.693667	7.32706e-35	0.4641	-	-
6	rs28732137	G	T	T	1.73966	1.59285	1.9	8.0983e-35	0.1081	-	-
6	rs13193224	G	T	T	1.73966	1.59285	1.9	8.0983e-35	0.1081	-	-
6	rs35205968	AC	A	A	1.73962	1.59282	1.89996	8.14343e-35	0.1081	-	-
6	rs36119838	G	T	T	1.73962	1.59282	1.89996	8.14343e-35	0.1081	-	-
6	rs34531986	G	T	T	1.73962	1.59282	1.89996	8.14343e-35	0.1081	-	-
6	rs28893474	C	CA	CA	1.73953	1.59274	1.89986	8.23973e-35	0.1081	-	-
6	rs72441212	TTCTTGTGCAGA	T	T	1.73952	1.59273	1.89985	8.25172e-35	0.1081	-	-
6	rs201884483	GC	G	G	1.73952	1.59273	1.89985	8.25442e-35	0.1081	-	-
6	rs28732131	T	C	C	1.73952	1.59273	1.89985	8.2855e-35	0.1081	-	-
6	rs28732132	C	A	A	1.73952	1.59273	1.89985	8.2855e-35	0.1081	-	-
6	rs28895007	T	C	C	1.73776	1.5911	1.89794	1.10749e-34	0.1081	-	-
6	rs28895010	G	A	A	1.73776	1.5911	1.89794	1.10764e-34	0.1081	-	-
6	rs28732123	G	A	A	1.73783	1.59115	1.89802	1.10776e-34	0.1081	-	-
6	rs28895003	A	G	G	1.73777	1.59109	1.89796	1.12065e-34	0.1081	-	-
6	rs6908205	C	A	A	1.73773	1.59106	1.89792	1.12666e-34	0.1081	-	-
6	rs4947306	A	G	G	1.73773	1.59106	1.89792	1.12666e-34	0.1081	-	-
6	rs28895002	G	A	A	1.73773	1.59106	1.89792	1.12666e-34	0.1081	-	-
6	rs28732122	C	T	T	1.73773	1.59106	1.89792	1.12666e-34	0.1081	-	-
6	rs28385398	G	A	A	1.73539	1.58917	1.89508	1.25277e-34	0.1082	-	-
6	rs2249935	G	A	A	1.80007	1.63835	1.97776	1.93117e-34	0.08882	-	-
6	rs28732134	G	T	T	1.73641	1.58943	1.89699	2.1909e-34	0.108	-	-
6	rs36058333	AC	A	A	1.73193	1.58592	1.89139	2.35624e-34	0.1091	-	-
6	rs28893472	C	CT	CT	1.73014	1.58425	1.88946	3.20599e-34	0.1092	-	-
6	rs3130455	A	T	T	2.63716	2.25631	3.08229	3.71487e-34	0.02046	-	-
6	rs3094662	A	C	C	2.63449	2.25419	3.07895	4.05128e-34	0.02041	CCHCR1	coiled-coil alpha-helical rod protein 1
6	rs130076	G	A	A	2.63449	2.25419	3.07895	4.05128e-34	0.02041	CCHCR1	coiled-coil alpha-helical rod protein 1
6	rs13195945	G	A	A	1.73018	1.58401	1.88984	4.31374e-34	0.1077	-	-
6	rs13195715	A	G	G	1.72984	1.58365	1.88954	4.81033e-34	0.1077	-	-
6	rs3130514	C	G	G	1.59044	1.47577	1.71402	5.50091e-34	0.1953	-	-
6	rs3134785	G	A	A	1.59032	1.47566	1.71388	5.62925e-34	0.1953	-	-
6	rs3132506	T	C	C	1.58842	1.47399	1.71173	7.29022e-34	0.1958	-	-
6	rs3132505	G	T	T	1.58769	1.47334	1.71092	8.15025e-34	0.1956	-	-
6	rs9260324	G	A	G	1.52086	1.42099	1.62775	1.0761e-33	0.323	-	-
6	rs9380182	A	C	C	1.71672	1.57264	1.874	1.29921e-33	0.1141	FLOT1	flotillin 1	Novel
6	rs3130949	C	T	T	1.58754	1.47283	1.71118	1.37404e-33	0.1938	-	-
6	rs1265178	G	A	A	2.6241	2.24377	3.0689	1.41735e-33	0.02022	-	-
6	rs140047404	TTTTTA	T	T	2.61315	2.23587	3.05408	1.44501e-33	0.02054	CCHCR1	coiled-coil alpha-helical rod protein 1
6	rs1265071	A	C	C	2.61315	2.23587	3.05409	1.44916e-33	0.02054	CCHCR1	coiled-coil alpha-helical rod protein 1
6	rs9380134	G	C	C	1.71559	1.57143	1.87297	1.85928e-33	0.1164	-	-
6	rs2394895	T	C	C	1.58481	1.47029	1.70826	2.40954e-33	0.1936	-	-
6	rs12189871	C	T	T	2.61984	2.2393	3.06505	2.55385e-33	0.02032	-	-
6	rs3130530	A	G	G	1.58416	1.46971	1.70752	2.65569e-33	0.1937	-	-
6	rs2394894	T	C	C	1.58416	1.46971	1.70752	2.65569e-33	0.1937	-	-
6	rs3132495	T	A	A	1.58416	1.46971	1.70752	2.65569e-33	0.1936	-	-
6	rs130065	G	A	A	2.61255	2.23395	3.0553	2.69748e-33	0.02028	CCHCR1	coiled-coil alpha-helical rod protein 1
6	rs3130424	A	C	C	1.58376	1.46934	1.70709	2.86425e-33	0.1937	-	-
6	rs4406273	G	A	A	2.61437	2.23502	3.05809	2.96821e-33	0.02023	LINC02571	long intergenic non-protein coding RNA 2571
6	rs720466	C	G	G	2.60048	2.22508	3.03921	2.96869e-33	0.02069	-	-
6	rs3132515	G	A	A	1.58349	1.46909	1.70681	3.04173e-33	0.1936	-	-
6	rs9391634	C	G	G	1.71987	1.57423	1.87898	3.08918e-33	0.113	-	-
6	rs3134762	T	C	C	1.58331	1.46892	1.7066	3.13187e-33	0.1937	-	-
6	rs28732138	G	A	A	2.61374	2.23434	3.05755	3.26595e-33	0.02025	-	-
6	rs1793895	G	T	T	2.61091	2.23231	3.05373	3.284e-33	0.02033	-	-
6	rs9348841	T	C	C	1.70544	1.5631	1.86073	3.32764e-33	0.1143	PPP1R10	protein phosphatase 1 regulatory subunit 10	Novel
6	rs1639105	G	A	A	2.60965	2.23124	3.05222	3.50958e-33	0.02031	-	-
6	rs1062630	G	A	A	2.62368	2.24071	3.0721	4.42681e-33	0.0202	POU5F1	POU class 5 homeobox 1	Novel
6	rs143982339	CAT	C	C	1.70973	1.56604	1.86661	4.81956e-33	0.1138	ABCF1	ATP binding cassette subfamily F member 1
6	rs28579725	T	C	C	1.72462	1.57728	1.88572	5.64499e-33	0.1065	-	-
6	rs12199223	T	A	A	2.60252	2.22478	3.04439	6.1705e-33	0.02017	-	-
6	rs151195028	G	C	C	1.70234	1.55997	1.85771	7.42693e-33	0.1165	DHX16	DEAH-box helicase 16	Novel
6	rs3068795	AGG	A	A	2.6045	2.22533	3.04827	8.79917e-33	0.02017	HCG27	HLA complex group 27
6	rs1265177	A	G	G	2.6045	2.22533	3.04827	8.79917e-33	0.02017	-	-
6	rs1265181	G	C	C	2.60334	2.22435	3.0469	9.36352e-33	0.02017	-	-
6	rs3130699	T	C	C	1.52865	1.42558	1.63917	9.7885e-33	0.2676	-	-
6	rs2394886	G	A	A	1.57887	1.46446	1.70222	1.19087e-32	0.1929	-	-
6	rs1150765	C	T	T	2.58956	2.21391	3.02895	1.19898e-32	0.02069	-	-
6	rs13210419	G	A	A	2.62978	2.24204	3.08457	1.49462e-32	0.01947	LINC02571	long intergenic non-protein coding RNA 2571
6	rs12212594	T	C	C	2.63202	2.24334	3.08804	1.68362e-32	0.01946	-	-
6	rs13198298	C	T	T	2.58515	2.20886	3.02554	2.60966e-32	0.02023	PSORS1C1	psoriasis susceptibility 1 candidate 1
6	rs28728472	A	AC	AC	2.58065	2.20516	3.02007	3.18044e-32	0.02029	PSORS1C1	psoriasis susceptibility 1 candidate 1
6	rs12195316	G	A	A	2.58065	2.20516	3.02007	3.18044e-32	0.02029	-	-
6	rs3130936	C	T	T	1.5204	1.41826	1.62991	3.56887e-32	0.2747	-	-
6	rs1265159	G	A	A	2.57958	2.20402	3.01913	3.70711e-32	0.02036	POU5F1	POU class 5 homeobox 1	Novel
6	rs9391658	G	A	A	1.63721	1.50825	1.7772	5.1344e-32	0.1498	-	-
6	rs887465	C	G	G	2.57398	2.19918	3.01264	5.22486e-32	0.02039	PSORS1C3	psoriasis susceptibility 1 candidate 3
6	rs3130508	G	A	A	2.57398	2.19918	3.01264	5.22486e-32	0.02037	-	-
6	rs3130510	G	A	A	2.57398	2.19918	3.01264	5.22486e-32	0.02037	-	-
6	rs3130459	T	C	C	2.57398	2.19918	3.01264	5.22486e-32	0.02037	-	-
6	rs3130457	T	C	C	2.56298	2.19065	2.99861	6.95868e-32	0.02049	PSORS1C3	psoriasis susceptibility 1 candidate 3
6	rs143128695	A	G	G	1.69111	1.5492	1.84601	7.14989e-32	0.1163	ATAT1	alpha tubulin acetyltransferase 1	Novel
6	rs13212902	C	T	T	2.57102	2.19612	3.00991	7.67081e-32	0.02068	PSORS1C1	psoriasis susceptibility 1 candidate 1
6	rs28732090	C	G	G	2.57569	2.19932	3.01648	8.07944e-32	0.02003	-	-
6	rs6906565	C	T	T	2.56807	2.19365	3.00639	8.90249e-32	0.02072	PSORS1C1	psoriasis susceptibility 1 candidate 1
6	rs3095251	T	A	A	1.51672	1.41471	1.62608	9.3977e-32	0.2738	-	-
6	rs9380181	A	T	T	1.68647	1.54519	1.84066	1.15315e-31	0.1167	-	-
6	rs3130945	A	G	G	1.51484	1.413	1.62403	1.3417e-31	0.2738	-	-
6	rs3130946	C	T	T	1.51447	1.41264	1.62365	1.48192e-31	0.2738	-	-
6	rs9264681	G	C	C	0.642397	0.596434	0.691903	1.54493e-31	0.3717	HLA-C	major histocompatibility complex, class I, C
6	rs3134778	G	A	A	1.51397	1.41219	1.6231	1.62137e-31	0.2738	-	-
6	rs3134784	G	A	A	1.51398	1.41218	1.62311	1.63724e-31	0.2738	-	-
6	rs3130937	A	G	G	1.51398	1.41218	1.62311	1.63724e-31	0.2738	-	-
6	rs3130473	C	T	T	1.51358	1.41182	1.62267	1.76612e-31	0.2738	-	-
6	rs3130944	C	G	G	1.51404	1.41214	1.6233	1.87875e-31	0.2726	-	-
6	rs3130713	G	T	T	1.51754	1.41475	1.62779	2.14895e-31	0.2638	-	-
6	rs3134781	G	A	A	1.51275	1.41103	1.6218	2.16777e-31	0.2739	-	-
6	rs3134777	G	A	A	1.51186	1.41017	1.62089	2.76308e-31	0.2741	-	-
6	rs75644179	CAAG	C	C	0.640489	0.594171	0.690418	2.81037e-31	0.3623	-	-
6	rs2524062	G	A	A	0.640807	0.594482	0.690742	3.11403e-31	0.3624	-	-
6	rs3132531	C	T	T	1.51502	1.41245	1.62503	3.45716e-31	0.2637	-	-
6	rs3132530	C	T	T	1.51502	1.41244	1.62505	3.52205e-31	0.2637	-	-
6	rs3132529	T	G	G	1.51502	1.41244	1.62505	3.52205e-31	0.2637	-	-
6	rs3132521	C	T	T	1.51502	1.41244	1.62505	3.52205e-31	0.2637	-	-
6	rs2853923	A	G	G	0.667224	0.623169	0.714393	3.6651e-31	0.4916	LINC02571	long intergenic non-protein coding RNA 2571
6	rs2523622	G	C	G	1.48684	1.39051	1.58985	3.82126e-31	0.446	-	-
6	rs2844607	C	T	T	0.641749	0.595384	0.691724	4.47394e-31	0.3618	-	-
6	rs9265988	C	T	C	1.48647	1.39003	1.58959	5.02521e-31	0.4469	-	-
6	rs6927461	G	C	C	0.65884	0.61389	0.707082	5.618e-31	0.4246	-	-
6	rs2923005	G	T	G	1.48452	1.38844	1.58725	5.6547e-31	0.4455	-	-
6	rs2156875	C	T	C	1.48452	1.38844	1.58725	5.6547e-31	0.4455	-	-
6	rs9266002	G	A	G	1.48452	1.38844	1.58725	5.65481e-31	0.4455	-	-
6	rs9265999	G	C	G	1.48452	1.38841	1.58729	5.89377e-31	0.4455	-	-
6	rs9266000	T	C	T	1.48452	1.38841	1.58729	5.89377e-31	0.4455	-	-
6	rs2923006	G	T	G	1.48452	1.38841	1.58729	5.89377e-31	0.4455	-	-
6	rs2187578	T	G	T	1.48452	1.38841	1.58729	5.89377e-31	0.4455	-	-
6	rs9279141	CCT	C	CCT	1.48452	1.38841	1.58729	5.89377e-31	0.4455	-	-
6	rs2596512	T	C	T	1.48452	1.38841	1.58729	5.89377e-31	0.4455	-	-
6	rs2442731	G	A	G	1.48452	1.38841	1.58729	5.89377e-31	0.4456	-	-
6	rs3134768	G	C	C	1.5126	1.41003	1.62264	7.33747e-31	0.2627	-	-
6	rs199637340	AAAAG	A	A	2.61002	2.21772	3.0717	7.87506e-31	0.01898	-	-
6	rs9266046	G	C	G	1.48067	1.3848	1.58318	1.45112e-30	0.4492	-	-
6	rs9266047	G	A	G	1.48067	1.3848	1.58318	1.45112e-30	0.4492	-	-
6	rs28732129	G	C	C	1.71838	1.56679	1.88464	1.4891e-30	0.09962	-	-
6	rs9265995	T	C	T	1.48041	1.38448	1.583	1.72505e-30	0.4468	-	-
6	rs12211087	T	A	A	2.604	2.21136	3.06637	1.72711e-30	0.0197	LINC02571	long intergenic non-protein coding RNA 2571
6	rs28380783	A	G	G	1.67071	1.53013	1.8242	2.49969e-30	0.1157	-	-
6	rs2844608	C	T	T	0.660079	0.614748	0.708753	2.54044e-30	0.4152	-	-
6	rs9266075	G	T	G	1.48077	1.3843	1.58396	3.27177e-30	0.4619	-	-
6	rs9265989	A	G	A	1.4788	1.3827	1.58157	3.62105e-30	0.448	-	-
6	rs28732092	G	T	T	2.54782	2.16951	2.99211	4.00015e-30	0.01949	-	-
6	rs7768955	G	A	A	1.50398	1.40204	1.61334	4.35036e-30	0.2701	-	-
6	rs6933647	G	A	A	1.50915	1.40601	1.61985	4.44339e-30	0.2682	-	-
6	rs7769059	G	A	A	1.50366	1.40153	1.61323	6.14294e-30	0.2684	-	-
6	rs11267511	AGGGACAGTACCCAGG	A	A	1.48582	1.3875	1.5911	8.68046e-30	0.3142	-	-
6	rs28732127	G	A	A	1.6954	1.54732	1.85765	1.03048e-29	0.1056	-	-
6	rs9265992	G	A	G	1.47472	1.37873	1.5774	1.14228e-29	0.4495	-	-
6	rs12202241	T	G	G	1.48178	1.38413	1.58631	1.2216e-29	0.3164	-	-
6	rs4713270	G	A	A	1.47867	1.3814	1.58279	1.91774e-29	0.3181	-	-
6	rs6916422	C	T	T	1.47818	1.38085	1.58237	2.43324e-29	0.3177	-	-
6	rs60131261	GTTTA	G	G	1.47698	1.37992	1.58087	2.43967e-29	0.318	-	-
6	rs66503418	TGAA	T	T	1.47698	1.37992	1.58087	2.43967e-29	0.318	-	-
6	rs6916451	C	T	T	1.4778	1.38049	1.58196	2.66375e-29	0.3179	-	-
6	rs9378141	A	C	C	1.4778	1.38049	1.58196	2.66375e-29	0.3179	-	-
6	rs9378142	A	C	C	1.4778	1.38049	1.58196	2.66375e-29	0.3179	-	-
6	rs9404959	C	A	A	1.4778	1.38049	1.58196	2.66375e-29	0.3179	-	-
6	rs12193110	C	T	T	1.47654	1.3795	1.58039	2.70578e-29	0.3189	-	-
6	rs73727620	A	G	G	1.47704	1.3798	1.58114	3.07594e-29	0.3173	-	-
6	rs6935024	C	T	T	1.47584	1.37887	1.57963	3.0825e-29	0.3183	-	-
6	rs12206499	A	G	G	1.47584	1.37887	1.57963	3.0825e-29	0.3183	-	-
6	rs4248141	G	A	A	1.47586	1.37887	1.57967	3.14493e-29	0.3183	-	-
6	rs4248142	C	T	T	1.47586	1.37887	1.57967	3.14493e-29	0.3183	-	-
6	rs6914900	T	G	G	1.47584	1.37886	1.57965	3.15191e-29	0.3183	-	-
6	rs4391295	C	T	T	1.47584	1.37886	1.57965	3.15191e-29	0.3183	-	-
6	rs4248143	C	T	T	1.47584	1.37886	1.57965	3.15191e-29	0.3183	-	-
6	rs4959038	G	A	A	1.47584	1.37886	1.57965	3.15191e-29	0.3183	-	-
6	rs6927487	T	C	C	1.47584	1.37886	1.57965	3.15191e-29	0.3183	-	-
6	rs12175093	A	G	G	1.47584	1.37886	1.57965	3.15191e-29	0.3183	-	-
6	rs12193100	G	A	A	1.47584	1.37886	1.57965	3.15191e-29	0.3183	-	-
6	rs12200176	T	C	C	1.47584	1.37886	1.57965	3.15191e-29	0.3183	-	-
6	rs12193208	G	T	T	1.47584	1.37886	1.57965	3.15191e-29	0.3183	-	-
6	rs2523935	G	A	A	1.47573	1.37876	1.57953	3.20791e-29	0.3185	-	-
6	rs12195207	C	T	T	1.47752	1.38012	1.58179	3.26657e-29	0.3192	-	-
6	rs2394247	A	C	C	1.47564	1.37867	1.57943	3.28553e-29	0.3182	-	-
6	rs28732133	T	G	G	1.71197	1.55849	1.88056	3.29011e-29	0.09883	-	-
6	rs4713269	A	T	T	1.47553	1.37857	1.5793	3.32771e-29	0.3183	-	-
6	rs34866759	CA	C	C	1.47553	1.37857	1.57931	3.33643e-29	0.3185	-	-
6	rs9391895	G	A	A	1.73947	1.57896	1.9163	3.77213e-29	0.08889	-	-
6	rs12195260	G	A	A	1.47614	1.37892	1.58023	3.96243e-29	0.3178	-	-
6	rs6935189	C	G	G	1.47493	1.37797	1.57872	4.03769e-29	0.3184	-	-
6	rs6935198	C	G	G	1.47493	1.37797	1.57872	4.03769e-29	0.3184	-	-
6	rs6935053	A	C	C	1.47493	1.37797	1.57872	4.03769e-29	0.3184	-	-
6	rs9380238	A	G	G	1.50888	1.40407	1.62152	4.13026e-29	0.232	LINC02571	long intergenic non-protein coding RNA 2571
6	rs6941600	G	T	T	1.47498	1.3779	1.5789	4.66616e-29	0.3182	-	-
6	rs6903753	A	G	G	1.47434	1.3774	1.57809	4.67748e-29	0.3194	HCG9	HLA complex group 9
6	rs4959037	A	T	T	1.47407	1.37718	1.57779	4.8289e-29	0.3186	-	-
6	rs41265816	G	C	C	1.47452	1.37743	1.57846	5.48336e-29	0.3182	HCG9	HLA complex group 9
6	rs41265820	G	T	T	1.47452	1.37743	1.57846	5.48336e-29	0.3182	HCG9	HLA complex group 9
6	rs3823369	A	T	T	1.4738	1.3768	1.57764	6.0301e-29	0.3188	HCG9	HLA complex group 9
6	rs117295261	G	T	T	1.66774	1.52419	1.82482	8.25001e-29	0.1129	-	-
6	rs2071568	G	A	A	1.47277	1.37576	1.57662	8.3861e-29	0.3182	HCG9	HLA complex group 9
6	rs34811773	CG	C	C	1.47279	1.37566	1.57678	9.77383e-29	0.3175	-	-
6	rs4538750	G	A	A	1.47079	1.37411	1.57427	9.88782e-29	0.3192	-	-
6	rs3823352	G	C	C	1.47115	1.37434	1.57479	1.0606e-28	0.3186	HCG9	HLA complex group 9
6	rs6904029	G	A	A	1.47111	1.3743	1.57474	1.07196e-28	0.3186	HCG9	HLA complex group 9
6	rs3823358	G	A	A	1.47101	1.37421	1.57463	1.09168e-28	0.3186	HCG9	HLA complex group 9
6	rs41271924	GT	G	G	1.47036	1.37358	1.57395	1.28311e-28	0.3186	HCG9	HLA complex group 9
6	rs3823353	G	T	T	1.47033	1.37355	1.57392	1.30641e-28	0.3186	HCG9	HLA complex group 9
6	rs3823354	T	A	A	1.47033	1.37355	1.57392	1.30641e-28	0.3186	HCG9	HLA complex group 9
6	rs36019691	T	C	C	1.47033	1.37355	1.57392	1.30641e-28	0.3186	HCG9	HLA complex group 9
6	rs35835721	T	G	G	1.47033	1.37355	1.57392	1.30641e-28	0.3186	HCG9	HLA complex group 9
6	rs67348472	GGCT	G	G	1.47033	1.37355	1.57392	1.30641e-28	0.3186	HCG9	HLA complex group 9
6	rs35066870	A	G	G	1.47033	1.37355	1.57392	1.30641e-28	0.3186	HCG9	HLA complex group 9
6	rs35159526	T	G	G	1.47033	1.37355	1.57392	1.30641e-28	0.3186	HCG9	HLA complex group 9
6	rs6942179	C	A	A	1.47033	1.37355	1.57392	1.30641e-28	0.3186	HCG9	HLA complex group 9
6	rs2232237	T	C	C	1.47033	1.37355	1.57392	1.30641e-28	0.3186	HCG9	HLA complex group 9
6	rs4959010	T	C	C	1.47007	1.37332	1.57364	1.35406e-28	0.3187	HCG9	HLA complex group 9
6	rs4713276	C	G	G	1.46841	1.37203	1.57156	1.38665e-28	0.3231	-	-
6	rs3823377	C	A	A	1.46637	1.36999	1.56953	2.56655e-28	0.3222	HCG9	HLA complex group 9
6	rs3823375	T	C	C	1.46619	1.36983	1.56933	2.64899e-28	0.3223	HCG9	HLA complex group 9
6	rs3823374	C	A	A	1.46615	1.36979	1.56928	2.68076e-28	0.3222	HCG9	HLA complex group 9
6	rs2517685	G	T	T	1.46441	1.36838	1.56718	2.95052e-28	0.3249	-	-
6	rs2735082	C	G	G	1.46421	1.36819	1.56696	3.09296e-28	0.3252	-	-
6	rs6936825	T	C	C	0.674494	0.62853	0.72382	7.80606e-28	0.4229	-	-
6	rs6914215	C	A	A	0.675214	0.629226	0.724562	1.00839e-27	0.4231	-	-
6	rs6914076	A	G	G	0.67536	0.629372	0.724708	1.04878e-27	0.4232	-	-
6	rs6930462	T	G	G	0.675379	0.629392	0.724727	1.05328e-27	0.4231	-	-
6	rs3998077	G	A	A	0.675494	0.629502	0.724847	1.1005e-27	0.4231	-	-
6	rs2894181	A	G	G	0.676603	0.63063	0.725927	1.40781e-27	0.4237	-	-
6	rs4410769	C	T	T	0.6766	0.630608	0.725946	1.48083e-27	0.4234	-	-
6	rs6921948	A	C	C	0.676679	0.630672	0.726041	1.5722e-27	0.4233	HCG27	HLA complex group 27
6	rs192622422	G	A	A	1.89219	1.68581	2.12383	2.67113e-27	0.0555	-	-
6	rs2734959	G	C	C	1.44363	1.35028	1.54342	4.98673e-27	0.4141	-	-
6	rs886396	G	A	A	1.44188	1.34863	1.54158	7.56552e-27	0.4146	HCP5B	HLA complex P5B
6	rs1611657	G	A	A	1.44304	1.34948	1.54308	7.88569e-27	0.4134	HCP5B	HLA complex P5B
6	rs9380213	G	A	A	1.59974	1.46799	1.74332	8.7146e-27	0.1271	-	-
6	rs2844824	A	T	T	1.44195	1.34853	1.54184	9.17767e-27	0.4131	-	-
6	rs7757622	C	T	T	0.683059	0.636987	0.732463	1.03528e-26	0.4321	-	-
6	rs9393967	C	T	T	1.72417	1.56036	1.90518	1.07111e-26	0.08241	LINC02829	long intergenic non-protein coding RNA 2829
6	rs35652162	TC	T	T	1.44062	1.34734	1.54035	1.14302e-26	0.4144	HCP5B	HLA complex P5B
6	rs4248140	T	C	C	1.44208	1.34834	1.54235	1.33296e-26	0.3459	-	-
6	rs6941153	C	T	T	1.43626	1.34282	1.5362	5.15503e-26	0.3471	-	-
6	rs4713273	G	C	C	1.43626	1.34282	1.5362	5.15503e-26	0.3471	-	-
6	rs9378188	G	A	A	1.45771	1.35913	1.56345	5.18167e-26	0.2758	-	-
6	rs9258981	A	G	G	1.43072	1.33821	1.52963	8.49022e-26	0.4198	HCP5B	HLA complex P5B
6	rs6914699	T	C	C	1.43319	1.34	1.53287	9.44566e-26	0.3477	-	-
6	rs9394024	C	A	A	1.57249	1.4448	1.71147	1.11598e-25	0.1339	MUC22	mucin 22
6	rs34176602	CT	C	C	2.27698	1.95162	2.65659	1.32745e-25	0.02328	PSORS1C1	psoriasis susceptibility 1 candidate 1
6	rs9260765	C	T	C	1.43056	1.33752	1.53007	1.69664e-25	0.3496	-	-
6	rs6457110	T	A	A	1.43058	1.33751	1.53011	1.73962e-25	0.3482	-	-
6	rs6415118	G	A	G	1.43013	1.33714	1.52958	1.80503e-25	0.3494	-	-
6	rs3823376	C	T	C	1.43188	1.33837	1.53193	2.0571e-25	0.3506	HCG9	HLA complex group 9
6	rs9368601	C	T	T	1.67973	1.52356	1.8519	2.07126e-25	0.08742	-	-
6	rs1611637	A	G	G	1.4233	1.33135	1.52161	3.83699e-25	0.4422	-	-
6	rs9263980	A	G	G	0.693203	0.646668	0.743086	4.87667e-25	0.4377	-	-
6	rs9357105	G	A	A	1.5671	1.43907	1.70652	5.1352e-25	0.1301	-	-
6	rs1611232	G	A	A	1.42256	1.33047	1.52104	5.66042e-25	0.45	-	-
6	rs3893464	G	A	G	1.42487	1.3322	1.52399	5.76849e-25	0.3512	-	-
6	rs9263928	T	G	G	0.693625	0.647059	0.743542	5.87687e-25	0.4366	-	-
6	rs3869109	A	G	G	0.693722	0.647163	0.743631	5.92979e-25	0.437	-	-
6	rs885936	G	A	A	1.42216	1.33007	1.52062	6.26934e-25	0.4499	-	-
6	rs9263968	G	A	A	0.693432	0.646793	0.743435	6.65108e-25	0.4366	-	-
6	rs4457201	T	C	C	0.693706	0.647078	0.743693	6.95028e-25	0.4367	-	-
6	rs9263929	G	A	A	0.693706	0.647078	0.743693	6.95028e-25	0.4367	-	-
6	rs9263936	A	C	C	0.693706	0.647078	0.743693	6.95028e-25	0.4367	-	-
6	rs9263938	C	T	T	0.693706	0.647078	0.743693	6.95028e-25	0.4367	-	-
6	rs9263940	C	T	T	0.693706	0.647078	0.743693	6.95028e-25	0.4367	-	-
6	rs9263944	A	G	G	0.693706	0.647078	0.743693	6.95028e-25	0.4367	-	-
6	rs9263947	T	G	G	0.693706	0.647078	0.743693	6.95028e-25	0.4367	-	-
6	rs9263953	T	C	C	0.693706	0.647078	0.743693	6.95028e-25	0.4367	-	-
6	rs9281259	A	AG	AG	0.693706	0.647078	0.743693	6.95028e-25	0.4367	-	-
6	rs9263956	C	T	T	0.693706	0.647078	0.743693	6.95028e-25	0.4367	-	-
6	rs9263967	A	G	G	0.693706	0.647078	0.743693	6.95028e-25	0.4367	-	-
6	rs34105339	T	C	C	2.10038	1.82356	2.41921	7.66469e-25	0.03045	-	-
6	rs9263978	A	G	G	0.693922	0.64726	0.743948	7.98259e-25	0.4367	-	-
6	rs9378228	G	T	T	1.57057	1.44114	1.71163	8.00905e-25	0.1288	-	-
6	rs9259002	G	C	C	1.42003	1.3281	1.51832	9.69719e-25	0.4474	HCP5B	HLA complex P5B
6	rs9259114	C	A	A	1.41945	1.32759	1.51766	1.05186e-24	0.4475	-	-
6	rs9263927	C	T	T	0.694561	0.647844	0.744648	1.07564e-24	0.4356	-	-
6	rs9259018	T	C	C	1.41862	1.32692	1.51666	1.10767e-24	0.4484	HCP5B	HLA complex P5B
6	rs9266717	A	G	A	1.84687	1.64255	2.07662	1.11706e-24	0.05213	-	-
6	rs9266718	C	T	C	1.84687	1.64255	2.07662	1.11732e-24	0.05213	-	-
6	rs9278377	CCA	C	C	1.41845	1.32661	1.51666	1.38084e-24	0.4472	HCP5B	HLA complex P5B
6	rs3132709	A	G	G	1.41845	1.32661	1.51666	1.38084e-24	0.4472	HCP5B	HLA complex P5B
6	rs9259113	C	T	T	1.41845	1.32661	1.51665	1.38178e-24	0.4472	-	-
6	rs3132703	C	T	T	1.41845	1.32661	1.51665	1.38193e-24	0.4472	-	-
6	rs9258940	C	T	T	1.41734	1.32568	1.51533	1.52979e-24	0.4485	HCP5B	HLA complex P5B
6	rs9258941	C	T	T	1.41709	1.32546	1.51505	1.58906e-24	0.4485	HCP5B	HLA complex P5B
6	rs3095341	T	C	T	1.53683	1.41527	1.66883	1.59267e-24	0.1554	HCG20	HLA complex group 20	Novel
6	rs9263960	T	C	C	0.694403	0.647501	0.744704	1.59353e-24	0.4347	-	-
6	rs58323866	C	CT	CT	1.41706	1.32535	1.51511	1.76118e-24	0.4481	-	-
6	rs9258898	T	C	C	1.41685	1.32518	1.51487	1.78959e-24	0.4482	-	-
6	rs1061537	G	A	G	1.41925	1.32697	1.51795	1.84664e-24	0.3561	-	-
6	rs28732147	G	A	A	1.45684	1.35521	1.56609	2.01997e-24	0.2457	-	-
6	rs3132714	T	C	C	1.41574	1.32421	1.51361	2.09994e-24	0.4488	HCP5B	HLA complex P5B
6	rs3128894	A	C	C	1.41558	1.32408	1.5134	2.10964e-24	0.4488	HCP5B	HLA complex P5B
6	rs9258900	C	A	A	1.41615	1.32448	1.51416	2.19458e-24	0.4478	-	-
6	rs9258922	C	T	T	1.41552	1.324	1.51337	2.2016e-24	0.4488	-	-
6	rs9258923	G	C	C	1.41552	1.32399	1.51339	2.23569e-24	0.4488	-	-
6	rs3094159	G	A	A	1.41545	1.32392	1.5133	2.25938e-24	0.4488	-	-
6	rs3115618	C	T	T	1.41555	1.324	1.51343	2.26843e-24	0.4488	HCP5B	HLA complex P5B
6	rs3132718	T	C	C	1.4154	1.32388	1.51324	2.27755e-24	0.4488	-	-
6	rs9258966	C	T	T	1.41539	1.32387	1.51324	2.29437e-24	0.4488	HCP5B	HLA complex P5B
6	rs3132557	A	G	G	1.41717	1.32521	1.51551	2.29871e-24	0.4779	-	-
6	rs3132708	A	G	G	1.41533	1.32381	1.51318	2.3176e-24	0.4488	HCP5B	HLA complex P5B
6	rs3094152	G	A	A	1.41529	1.32378	1.51313	2.32679e-24	0.4488	HCP5B	HLA complex P5B
6	rs3128895	G	C	C	1.41529	1.32378	1.51313	2.32679e-24	0.4488	HCP5B	HLA complex P5B
6	rs3094151	C	G	G	1.41529	1.32378	1.51313	2.32679e-24	0.4488	HCP5B	HLA complex P5B
6	rs3132716	A	C	C	1.41529	1.32378	1.51313	2.32679e-24	0.4488	HCP5B	HLA complex P5B
6	rs9258947	G	C	C	1.41529	1.32378	1.51313	2.32679e-24	0.4488	HCP5B	HLA complex P5B
6	rs9258948	C	T	T	1.41529	1.32378	1.51313	2.32679e-24	0.4488	HCP5B	HLA complex P5B
6	rs3094655	A	G	G	1.41529	1.32378	1.51313	2.32679e-24	0.4488	HCP5B	HLA complex P5B
6	rs3128893	G	A	A	1.41529	1.32378	1.51313	2.32679e-24	0.4488	HCP5B	HLA complex P5B
6	rs3094150	A	G	G	1.41529	1.32378	1.51313	2.32679e-24	0.4488	HCP5B	HLA complex P5B
6	rs3128892	G	A	A	1.41529	1.32378	1.51313	2.32679e-24	0.4488	HCP5B	HLA complex P5B
6	rs3128891	G	A	A	1.41529	1.32378	1.51313	2.32679e-24	0.4488	HCP5B	HLA complex P5B
6	rs3094149	C	G	G	1.41529	1.32378	1.51313	2.32679e-24	0.4488	HCP5B	HLA complex P5B
6	rs3094148	A	G	G	1.41529	1.32378	1.51313	2.32679e-24	0.4488	HCP5B	HLA complex P5B
6	rs3132715	T	C	C	1.41529	1.32378	1.51313	2.32679e-24	0.4488	HCP5B	HLA complex P5B
6	rs3129008	C	T	T	1.41529	1.32378	1.51313	2.32679e-24	0.4488	HCP5B	HLA complex P5B
6	rs3128890	G	C	C	1.41529	1.32378	1.51313	2.32679e-24	0.4488	HCP5B	HLA complex P5B
6	rs2394227	G	A	A	1.41529	1.32378	1.51313	2.32679e-24	0.4488	HCP5B	HLA complex P5B
6	rs2893991	C	T	T	1.41529	1.32378	1.51313	2.32679e-24	0.4488	HCP5B	HLA complex P5B
6	rs2394228	C	G	G	1.41529	1.32378	1.51313	2.32679e-24	0.4488	HCP5B	HLA complex P5B
6	rs3132712	A	G	G	1.41529	1.32378	1.51313	2.32679e-24	0.4488	HCP5B	HLA complex P5B
6	rs9258983	A	T	T	1.41529	1.32378	1.51313	2.32679e-24	0.4488	HCP5B	HLA complex P5B
6	rs3132710	A	G	G	1.41529	1.32378	1.51313	2.32679e-24	0.4488	HCP5B	HLA complex P5B
6	rs3129007	C	T	T	1.41529	1.32378	1.51313	2.32679e-24	0.4488	HCP5B	HLA complex P5B
6	rs9258993	T	C	C	1.41529	1.32378	1.51313	2.32679e-24	0.4488	HCP5B	HLA complex P5B
6	rs9258994	C	G	G	1.41529	1.32378	1.51313	2.32679e-24	0.4488	HCP5B	HLA complex P5B
6	rs9258995	G	A	A	1.41529	1.32378	1.51313	2.32679e-24	0.4488	HCP5B	HLA complex P5B
6	rs9258996	C	T	T	1.41529	1.32378	1.51313	2.32679e-24	0.4488	HCP5B	HLA complex P5B
6	rs9258997	G	A	A	1.41529	1.32378	1.51313	2.32679e-24	0.4488	HCP5B	HLA complex P5B
6	rs9258999	G	A	A	1.41529	1.32378	1.51313	2.32679e-24	0.4488	HCP5B	HLA complex P5B
6	rs3128886	C	A	A	1.41529	1.32378	1.51313	2.32679e-24	0.4489	HCP5B	HLA complex P5B
6	rs3094160	A	G	G	1.41529	1.32378	1.51313	2.32679e-24	0.4488	-	-
6	rs3128898	G	T	T	1.41529	1.32378	1.51313	2.32679e-24	0.4488	-	-
6	rs3132720	A	C	C	1.41529	1.32378	1.51313	2.32679e-24	0.4488	-	-
6	rs9258854	G	A	A	1.41529	1.32378	1.51313	2.32679e-24	0.4488	-	-
6	rs9258855	T	C	C	1.41529	1.32378	1.51313	2.32679e-24	0.4488	-	-
6	rs9258856	C	A	A	1.41529	1.32378	1.51313	2.32679e-24	0.4488	-	-
6	rs9258857	T	C	C	1.41529	1.32378	1.51313	2.32679e-24	0.4488	-	-
6	rs3094158	A	G	G	1.41529	1.32378	1.51313	2.32679e-24	0.4488	-	-
6	rs3132719	A	C	C	1.41529	1.32378	1.51313	2.32679e-24	0.4488	-	-
6	rs3129011	C	T	T	1.41529	1.32378	1.51313	2.32679e-24	0.4488	-	-
6	rs3128897	G	C	C	1.41529	1.32378	1.51313	2.32679e-24	0.4488	-	-
6	rs3094156	G	A	A	1.41529	1.32378	1.51313	2.32679e-24	0.4488	-	-
6	rs3094155	G	A	A	1.41529	1.32378	1.51313	2.32679e-24	0.4488	-	-
6	rs9258890	A	G	G	1.41529	1.32378	1.51313	2.32679e-24	0.4488	-	-
6	rs9258891	C	G	G	1.41529	1.32378	1.51313	2.32679e-24	0.4488	-	-
6	rs9258894	A	C	C	1.41529	1.32378	1.51313	2.32679e-24	0.4488	-	-
6	rs9258896	A	G	G	1.41529	1.32378	1.51313	2.32679e-24	0.4488	-	-
6	rs9258901	C	T	T	1.41529	1.32378	1.51313	2.32679e-24	0.4488	-	-
6	rs9258902	T	G	G	1.41529	1.32378	1.51313	2.32679e-24	0.4488	-	-
6	rs2394224	A	G	G	1.41529	1.32378	1.51313	2.32679e-24	0.4488	-	-
6	rs2893988	A	G	G	1.41529	1.32378	1.51313	2.32679e-24	0.4488	-	-
6	rs2893989	A	G	G	1.41529	1.32378	1.51313	2.32679e-24	0.4488	-	-
6	rs3873264	C	T	T	1.41529	1.32378	1.51313	2.32679e-24	0.4488	-	-
6	rs2893990	A	T	T	1.41529	1.32378	1.51313	2.32679e-24	0.4488	-	-
6	rs2394225	G	A	A	1.41529	1.32378	1.51313	2.32679e-24	0.4488	-	-
6	rs2394226	G	T	T	1.41529	1.32378	1.51313	2.32679e-24	0.4488	-	-
6	rs9258912	A	G	G	1.41529	1.32378	1.51313	2.32679e-24	0.4488	-	-
6	rs9258913	C	T	T	1.41529	1.32378	1.51313	2.32679e-24	0.4488	-	-
6	rs9258914	G	A	A	1.41529	1.32378	1.51313	2.32679e-24	0.4488	-	-
6	rs9258915	C	T	T	1.41529	1.32378	1.51313	2.32679e-24	0.4488	-	-
6	rs9258916	A	G	G	1.41529	1.32378	1.51313	2.32679e-24	0.4488	-	-
6	rs9258917	A	C	C	1.41529	1.32378	1.51313	2.32679e-24	0.4488	-	-
6	rs9258918	G	A	A	1.41529	1.32378	1.51313	2.32679e-24	0.4488	-	-
6	rs9258919	A	G	G	1.41529	1.32378	1.51313	2.32679e-24	0.4488	-	-
6	rs9258921	C	T	T	1.41529	1.32378	1.51313	2.32679e-24	0.4488	-	-
6	rs9258924	C	G	G	1.41529	1.32378	1.51313	2.32679e-24	0.4488	-	-
6	rs9258925	A	G	G	1.41529	1.32378	1.51313	2.32679e-24	0.4488	-	-
6	rs9258926	C	T	T	1.41529	1.32378	1.51313	2.32679e-24	0.4488	-	-
6	rs9258927	A	C	C	1.41529	1.32378	1.51313	2.32679e-24	0.4488	-	-
6	rs9258928	A	C	C	1.41529	1.32378	1.51313	2.32679e-24	0.4488	-	-
6	rs3094154	G	A	A	1.41529	1.32378	1.51313	2.32679e-24	0.4488	-	-
6	rs3094153	G	A	A	1.41529	1.32378	1.51313	2.32679e-24	0.4488	-	-
6	rs3132717	T	C	C	1.41529	1.32378	1.51313	2.32679e-24	0.4488	-	-
6	rs3115615	G	C	C	1.41529	1.32378	1.51313	2.32873e-24	0.4489	-	-
6	rs3132704	A	G	G	1.41529	1.32378	1.51313	2.32873e-24	0.4489	-	-
6	rs9259108	A	T	T	1.41529	1.32378	1.51313	2.32885e-24	0.4489	-	-
6	rs9259111	G	A	A	1.41529	1.32378	1.51313	2.32885e-24	0.4489	-	-
6	rs9259009	C	A	A	1.41914	1.32668	1.51805	2.3443e-24	0.4439	HCP5B	HLA complex P5B
6	rs9259010	C	T	T	1.41914	1.32668	1.51805	2.3443e-24	0.4439	HCP5B	HLA complex P5B
6	rs9259117	A	G	G	1.41627	1.32452	1.51439	2.34556e-24	0.4479	-	-
6	rs9258885	C	G	G	1.41526	1.32375	1.5131	2.3527e-24	0.4488	-	-
6	rs9258886	G	T	T	1.41526	1.32375	1.5131	2.3527e-24	0.4488	-	-
6	rs9258887	G	C	C	1.41526	1.32375	1.5131	2.3527e-24	0.4488	-	-
6	rs9258888	A	T	T	1.41526	1.32375	1.5131	2.3527e-24	0.4488	-	-
6	rs71537586	T	C	C	1.41526	1.32375	1.5131	2.3527e-24	0.4488	-	-
6	rs3094654	T	C	C	1.41525	1.32374	1.51309	2.3529e-24	0.4488	HCP5B	HLA complex P5B
6	rs9258881	G	A	A	1.41525	1.32374	1.51309	2.3529e-24	0.4488	-	-
6	rs3094161	A	G	G	1.41524	1.32373	1.51308	2.36671e-24	0.4488	-	-
6	rs9258884	G	A	A	1.41567	1.32404	1.51364	2.40813e-24	0.4475	-	-
6	rs9258892	G	C	C	1.41529	1.32375	1.51316	2.41045e-24	0.4489	-	-
6	rs3132721	C	T	T	1.41469	1.32328	1.51242	2.47298e-24	0.4486	-	-
6	rs9263931	A	G	G	0.696055	0.649119	0.746385	2.64066e-24	0.4366	-	-
6	rs3129010	G	T	T	1.41441	1.32296	1.51218	2.79863e-24	0.4487	-	-
6	rs3129009	C	T	T	1.41441	1.32293	1.51221	2.88573e-24	0.4487	-	-
6	rs9259109	C	T	T	1.41456	1.32304	1.51241	2.90511e-24	0.4482	-	-
6	rs3115619	A	G	G	1.41421	1.32276	1.51199	2.96424e-24	0.4488	HCP5B	HLA complex P5B
6	rs35476027	ATCCCC	A	A	1.41445	1.32292	1.51232	3.05108e-24	0.4483	-	-
6	rs9259000	C	T	T	1.4143	1.32279	1.51215	3.11437e-24	0.4484	HCP5B	HLA complex P5B
6	rs3115622	T	C	C	1.4143	1.32279	1.51215	3.11485e-24	0.4484	HCP5B	HLA complex P5B
6	rs3094163	C	G	G	1.41382	1.32241	1.51155	3.15843e-24	0.4487	-	-
6	rs9259001	A	C	C	1.4143	1.32276	1.51218	3.21106e-24	0.4484	HCP5B	HLA complex P5B
6	rs9258962	A	G	G	1.4143	1.32276	1.51218	3.21163e-24	0.4484	HCP5B	HLA complex P5B
6	rs3094164	G	A	A	1.41385	1.32241	1.51161	3.23497e-24	0.4487	-	-
6	rs3128899	G	C	C	1.41385	1.32241	1.51161	3.23497e-24	0.4487	-	-
6	rs3132725	C	T	T	1.41385	1.32241	1.51161	3.23497e-24	0.4487	-	-
6	rs3115623	T	C	C	1.41385	1.32241	1.51161	3.23497e-24	0.4487	-	-
6	rs3094162	A	G	G	1.41382	1.32238	1.51158	3.25668e-24	0.4487	-	-
6	rs3132724	C	T	T	1.41382	1.32238	1.51158	3.25668e-24	0.4487	-	-
6	rs9258899	A	G	G	1.41435	1.32279	1.51226	3.25924e-24	0.4478	-	-
6	rs9468925	G	A	A	0.679657	0.630782	0.732318	3.59162e-24	0.3529	-	-
6	rs3128896	G	T	T	1.41338	1.32191	1.51117	3.84466e-24	0.4507	-	-
6	rs28994656	C	CT	CT	1.43009	1.33433	1.53272	4.67144e-24	0.2972	HLA-A	major histocompatibility complex, class I, A
6	rs113360274	A	G	A	1.41159	1.32011	1.50942	6.5338e-24	0.4515	-	-
6	rs6900458	C	T	T	0.672914	0.623031	0.726791	6.73204e-24	0.3253	HLA-C	major histocompatibility complex, class I, C
6	rs2394402	T	C	T	1.51395	1.39653	1.64125	7.63283e-24	0.1588	HCG20	HLA complex group 20	Novel
6	rs9273058	T	C	T	0.704402	0.657942	0.754144	7.86931e-24	0.4796	HLA-DQA1	major histocompatibility complex, class II, DQ alpha 1
6	rs9280738	T	TAAAATAAA	TAAAATAAA	1.4101	1.31881	1.50769	7.92823e-24	0.4485	-	-
6	rs9264086	G	A	A	0.699703	0.65262	0.750183	9.45556e-24	0.4299	-	-
6	rs754490661	T	TTTTACTAAA	TTTTACTAAA	1.40935	1.31806	1.50697	9.96796e-24	0.4485	-	-
6	rs2252937	T	C	C	2.19733	1.88352	2.56343	1.34193e-23	0.0249	-	-
6	rs9259014	A	G	G	1.408	1.31676	1.50556	1.37452e-23	0.448	HCP5B	HLA complex P5B
6	rs9271384	C	T	T	0.673786	0.623654	0.727948	1.38988e-23	0.3244	-	-
6	rs33959627	G	A	A	1.43067	1.33376	1.53463	1.4183e-23	0.2786	POLR1HASP	POLR1H antisense, pseudogene	Novel
6	rs2844518	C	T	T	1.4145	1.32142	1.51414	1.78058e-23	0.323	MICA	MHC class I polypeptide-related sequence A
6	rs141618471	A	G	G	1.55435	1.42535	1.69502	1.91064e-23	0.1274	-	-
6	rs9461682	A	G	G	0.685971	0.637003	0.738703	1.96186e-23	0.3586	-	-
6	rs3807031	C	A	A	1.42907	1.33225	1.53294	1.97977e-23	0.2785	PPP1R11	protein phosphatase 1 regulatory inhibitor subunit 11	Novel
6	rs70987617	AATGAATTG	A	A	1.42173	1.32673	1.52353	2.01196e-23	0.2985	HLA-A	major histocompatibility complex, class I, A
6	rs6917363	G	A	A	0.705177	0.658386	0.755292	2.0256e-23	0.46	-	-
6	rs9468914	A	C	C	0.686373	0.637415	0.739091	2.11256e-23	0.3586	-	-
6	rs28367589	C	A	A	0.686373	0.637415	0.739091	2.11256e-23	0.3586	-	-
6	rs2523621	G	T	G	0.705764	0.659015	0.75583	2.15613e-23	0.4622	-	-
6	rs3131039	G	A	G	1.5091	1.39177	1.63632	2.16705e-23	0.1581	HCG20	HLA complex group 20	Novel
6	rs3130667	A	G	A	1.5091	1.39176	1.63632	2.17494e-23	0.1581	HCG20	HLA complex group 20	Novel
6	rs3132602	C	T	C	1.5091	1.39176	1.63632	2.17494e-23	0.1581	HCG20	HLA complex group 20	Novel
6	rs4590261	T	C	C	0.66917	0.618331	0.72419	2.17726e-23	0.3047	-	-
6	rs6457372	A	G	G	0.705649	0.658866	0.755753	2.25071e-23	0.46	-	-
6	rs3129979	A	G	A	1.51007	1.39238	1.63771	2.37816e-23	0.1578	HCG20	HLA complex group 20	Novel
6	rs12153924	G	A	A	1.42066	1.32577	1.52235	2.39345e-23	0.2984	HLA-A	major histocompatibility complex, class I, A
6	rs4455663	T	C	C	0.668735	0.617783	0.72389	2.49726e-23	0.3047	-	-
6	rs12202296	T	C	C	1.42224	1.32672	1.52462	3.05785e-23	0.2982	HLA-A	major histocompatibility complex, class I, A
6	rs28749130	T	A	A	1.41823	1.32367	1.51954	3.23125e-23	0.3004	-	-
6	rs4141168	A	G	G	0.67984	0.629952	0.733677	3.26786e-23	0.3322	-	-
6	rs7740279	C	T	C	1.50684	1.38949	1.63409	3.69263e-23	0.1583	-	-
6	rs9259104	G	A	A	1.40382	1.3127	1.50127	3.92726e-23	0.4475	-	-
6	rs3131921	T	C	C	1.43643	1.337	1.54326	4.36799e-23	0.2447	MUCL3	mucin like 3	Novel
6	rs9263964	C	T	T	0.702029	0.65444	0.753079	5.17796e-23	0.4188	-	-
6	rs9468911	G	A	A	0.680944	0.630945	0.734905	5.2847e-23	0.3312	-	-
6	rs9461680	C	T	T	0.680966	0.630965	0.734929	5.32878e-23	0.3312	-	-
6	rs28722181	A	T	T	0.681319	0.631285	0.73532	6.18595e-23	0.3315	-	-
6	rs3128887	G	T	T	1.40486	1.31301	1.50313	6.56833e-23	0.457	HCP5B	HLA complex P5B
6	rs9357135	C	T	T	1.56552	1.43195	1.71154	6.7988e-23	0.1188	NCR3	natural cytotoxicity triggering receptor 3
6	rs28780072	T	C	C	1.41431	1.32	1.51536	7.22759e-23	0.3003	-	-
6	rs2975050	C	T	T	1.41492	1.32036	1.51624	7.92438e-23	0.3004	HLA-A	major histocompatibility complex, class I, A
6	rs2735099	G	T	T	1.41476	1.32023	1.51607	8.14362e-23	0.3009	-	-
6	rs28380934	A	G	G	1.91105	1.67954	2.17447	8.36724e-23	0.04069	-	-
6	rs28380933	C	T	T	1.91103	1.67952	2.17445	8.37608e-23	0.04069	-	-
6	rs28380875	G	T	T	1.47909	1.36795	1.59926	9.10887e-23	0.1775	-	-
6	rs3115636	T	G	G	1.41283	1.31865	1.51374	9.39015e-23	0.3005	-	-
6	rs28367857	T	C	C	1.47753	1.36675	1.5973	9.50311e-23	0.1773	-	-
6	rs28367858	G	A	A	1.47753	1.36674	1.59731	9.61658e-23	0.1773	-	-
6	rs6904669	A	G	G	0.689531	0.640191	0.742673	9.84066e-23	0.3537	-	-
6	rs13207054	G	A	A	1.41038	1.31676	1.51066	9.95899e-23	0.302	HLA-A	major histocompatibility complex, class I, A
6	rs13215305	G	A	A	1.41355	1.31912	1.51474	1.00322e-22	0.3003	-	-
6	rs2517721	G	T	T	1.41355	1.31912	1.51474	1.01083e-22	0.3003	-	-
6	rs2517719	G	C	C	1.41355	1.31912	1.51474	1.01083e-22	0.3003	-	-
6	rs28749157	C	T	T	1.41355	1.31912	1.51474	1.01083e-22	0.3003	-	-
6	rs13215306	G	A	A	1.41355	1.31912	1.51474	1.01083e-22	0.3003	-	-
6	rs13215316	G	A	A	1.41355	1.31912	1.51474	1.01083e-22	0.3003	-	-
6	rs28749158	G	A	A	1.41355	1.31912	1.51474	1.01083e-22	0.3003	-	-
6	rs28749159	G	A	A	1.41355	1.31912	1.51474	1.01083e-22	0.3003	-	-
6	rs28749160	C	T	T	1.41355	1.31912	1.51474	1.01083e-22	0.3003	-	-
6	rs28749161	A	C	C	1.41355	1.31912	1.51474	1.01083e-22	0.3003	-	-
6	rs28749162	C	T	T	1.41355	1.31912	1.51474	1.01083e-22	0.3003	-	-
6	rs28894078	G	A	A	1.41355	1.31912	1.51474	1.01083e-22	0.3003	-	-
6	rs28894079	G	A	A	1.41355	1.31912	1.51474	1.01083e-22	0.3003	-	-
6	rs2735098	C	A	A	1.41352	1.31909	1.51472	1.01819e-22	0.3003	-	-
6	rs28749141	G	C	C	1.41351	1.31908	1.51471	1.02026e-22	0.3003	HLA-A	major histocompatibility complex, class I, A
6	rs9391669	C	G	G	1.41351	1.31908	1.51471	1.02026e-22	0.3003	HLA-A	major histocompatibility complex, class I, A
6	rs2916804	A	G	G	1.41351	1.31908	1.51471	1.02026e-22	0.3003	-	-
6	rs2975047	G	A	A	1.41351	1.31908	1.51471	1.02026e-22	0.3003	-	-
6	rs3016022	A	G	G	1.41351	1.31908	1.51471	1.02026e-22	0.3003	-	-
6	rs35320382	A	T	A	1.39961	1.30866	1.49689	1.05317e-22	0.466	-	-
6	rs1065045	C	T	T	0.663622	0.611404	0.7203	1.0581e-22	0.2994	HLA-DQA1	major histocompatibility complex, class II, DQ alpha 1
6	rs34543080	G	T	G	1.39961	1.30865	1.4969	1.06938e-22	0.466	-	-
6	rs7742733	A	G	A	1.39948	1.30853	1.49674	1.08525e-22	0.466	-	-
6	rs2975049	G	A	A	1.41318	1.31876	1.51436	1.0977e-22	0.3004	HLA-A	major histocompatibility complex, class I, A
6	rs4992475	G	A	A	1.47392	1.36389	1.59283	1.13158e-22	0.18	-	-
6	rs2975051	C	T	T	1.41331	1.31882	1.51456	1.1375e-22	0.3009	HLA-A	major histocompatibility complex, class I, A
6	rs9272168	T	C	C	0.678722	0.628096	0.733428	1.14188e-22	0.3167	-	-
6	rs200247843	C	CAG	CAG	0.678726	0.6281	0.733434	1.1444e-22	0.3167	-	-
6	rs2735095	C	A	A	1.41304	1.31861	1.51422	1.14999e-22	0.2997	-	-
6	rs2571388	A	T	T	1.41304	1.31861	1.51422	1.14999e-22	0.2997	-	-
6	rs2975041	T	C	C	1.41164	1.31753	1.51247	1.1981e-22	0.3011	-	-
6	rs28380867	G	A	A	1.47904	1.3676	1.59956	1.20956e-22	0.1769	-	-
6	rs28380868	G	A	A	1.47904	1.3676	1.59956	1.20956e-22	0.1769	-	-
6	rs28993377	CCT	C	C	1.41161	1.31749	1.51245	1.22374e-22	0.3012	-	-
6	rs9271377	T	G	G	0.682438	0.632186	0.736685	1.23515e-22	0.3262	-	-
6	rs4992478	G	A	A	1.4747	1.36435	1.59398	1.25546e-22	0.1795	-	-
6	rs13201284	C	T	T	1.41146	1.31735	1.5123	1.26037e-22	0.3012	-	-
6	rs13201160	A	C	C	1.41145	1.31733	1.51228	1.26497e-22	0.3012	-	-
6	rs16896724	G	T	T	1.41137	1.31725	1.5122	1.29254e-22	0.3013	-	-
6	rs143009074	C	CT	CT	1.41387	1.31906	1.5155	1.38466e-22	0.3028	-	-
6	rs28780073	C	G	G	1.41387	1.31906	1.5155	1.38466e-22	0.3028	-	-
6	rs2975048	G	T	T	1.41204	1.31769	1.51315	1.39195e-22	0.3003	HLA-A	major histocompatibility complex, class I, A
6	rs28380928	T	C	C	1.47256	1.36265	1.59133	1.39427e-22	0.1801	-	-
6	rs28749132	G	A	A	1.41157	1.31733	1.51256	1.39985e-22	0.3007	-	-
6	rs13214982	A	G	G	1.41199	1.31764	1.51309	1.40035e-22	0.3003	-	-
6	rs6904670	A	G	G	0.690443	0.641031	0.743662	1.40808e-22	0.3537	-	-
6	rs9404954	T	C	C	1.41167	1.31735	1.51274	1.48683e-22	0.3004	HLA-A	major histocompatibility complex, class I, A
6	rs4992473	G	T	T	1.47244	1.36247	1.59129	1.51486e-22	0.1802	-	-
6	rs9295830	C	T	T	1.41895	1.32272	1.52218	1.57797e-22	0.2802	RNF39	ring finger protein 39
6	rs28749142	T	A	A	1.42115	1.32431	1.52508	1.66675e-22	0.2921	HLA-A	major histocompatibility complex, class I, A
6	rs2517715	T	C	C	1.40986	1.31588	1.51056	1.68616e-22	0.3016	-	-
6	rs553500510	TG	T	TG	1.39769	1.30678	1.49493	1.72052e-22	0.4663	-	-
6	rs573651432	GC	G	GC	1.39769	1.30678	1.49493	1.72052e-22	0.4663	-	-
6	rs2975045	G	A	A	1.40987	1.31586	1.51058	1.72447e-22	0.3016	-	-
6	rs2916805	G	C	C	1.40987	1.31586	1.51058	1.72447e-22	0.3016	-	-
6	rs2735093	C	A	A	1.40987	1.31586	1.51058	1.72447e-22	0.3016	-	-
6	rs2517712	T	C	C	1.40987	1.31586	1.51058	1.72447e-22	0.3016	-	-
6	rs2517711	C	T	T	1.40987	1.31586	1.51058	1.72447e-22	0.3016	-	-
6	rs796609874	AGC	A	A	1.3981	1.30707	1.49548	1.75519e-22	0.4457	-	-
6	rs13203830	G	A	A	1.40971	1.31569	1.51045	1.8286e-22	0.302	HLA-A	major histocompatibility complex, class I, A
6	rs28749133	G	A	A	1.40971	1.31569	1.51045	1.8286e-22	0.302	-	-
6	rs28749131	G	A	A	1.40971	1.3157	1.51045	1.82863e-22	0.302	-	-
6	rs28993375	AC	A	A	1.40971	1.31569	1.51045	1.82881e-22	0.302	-	-
6	rs28749121	C	T	T	1.4097	1.31568	1.51044	1.83501e-22	0.302	-	-
6	rs28749120	G	A	A	1.4097	1.31568	1.51044	1.83517e-22	0.302	-	-
6	rs28749122	T	C	C	1.4097	1.31568	1.51044	1.83533e-22	0.302	-	-
6	rs28749123	C	T	T	1.4097	1.31568	1.51044	1.83533e-22	0.302	-	-
6	rs28749119	C	T	T	1.4097	1.31568	1.51044	1.83554e-22	0.302	-	-
6	rs28749124	C	T	T	1.4097	1.31568	1.51044	1.83559e-22	0.302	-	-
6	rs28749125	C	A	A	1.4097	1.31568	1.51044	1.83593e-22	0.302	-	-
6	rs28749126	T	C	C	1.4097	1.31568	1.51044	1.83593e-22	0.302	-	-
6	rs28749127	G	A	A	1.4097	1.31568	1.51044	1.83593e-22	0.302	-	-
6	rs28749128	G	T	T	1.4097	1.31568	1.51044	1.83593e-22	0.302	-	-
6	rs28749129	C	T	T	1.4097	1.31568	1.51044	1.83593e-22	0.302	-	-
6	rs13198419	G	C	C	1.40971	1.31569	1.51045	1.83597e-22	0.302	-	-
6	rs9368614	C	T	T	1.40971	1.31569	1.51045	1.83658e-22	0.302	-	-
6	rs9368615	G	T	T	1.40971	1.31569	1.51045	1.83658e-22	0.302	-	-
6	rs2904760	A	G	G	1.40971	1.31569	1.51045	1.83668e-22	0.302	-	-
6	rs28749117	A	G	G	1.4097	1.31568	1.51044	1.83819e-22	0.302	-	-
6	rs28749118	G	T	T	1.4097	1.31568	1.51044	1.83846e-22	0.302	-	-
6	rs2517730	T	A	A	1.40967	1.31566	1.51041	1.83941e-22	0.3019	-	-
6	rs28749115	C	T	T	1.40969	1.31567	1.51043	1.84095e-22	0.302	-	-
6	rs28749116	A	G	G	1.40969	1.31567	1.51043	1.84095e-22	0.302	-	-
6	rs2517729	A	G	G	1.40969	1.31567	1.51043	1.8446e-22	0.302	-	-
6	rs117116160	C	T	T	1.53626	1.40922	1.67476	1.85857e-22	0.1292	MICA	MHC class I polypeptide-related sequence A
6	rs56221809	G	C	G	1.39678	1.30599	1.49388	1.92565e-22	0.4665	-	-
6	rs2735097	C	A	A	1.41028	1.31604	1.51126	1.97677e-22	0.3003	-	-
6	rs28749135	C	T	T	1.4108	1.31641	1.51196	2.01779e-22	0.3004	-	-
6	rs2517708	C	T	T	1.40913	1.31517	1.50981	2.02016e-22	0.3017	-	-
6	rs9272258	G	T	T	0.680008	0.62922	0.734896	2.08623e-22	0.3147	HLA-DQA1	major histocompatibility complex, class II, DQ alpha 1
6	rs9272259	A	G	G	0.680008	0.62922	0.734896	2.08623e-22	0.3147	HLA-DQA1	major histocompatibility complex, class II, DQ alpha 1
6	rs13219558	T	C	C	1.40915	1.31513	1.50989	2.12799e-22	0.3014	HLA-A	major histocompatibility complex, class I, A
6	rs28380865	T	C	C	1.47448	1.36354	1.59445	2.25543e-22	0.177	-	-
6	rs28380866	C	T	T	1.47448	1.36354	1.59445	2.25543e-22	0.177	-	-
6	rs28380935	G	A	A	1.90142	1.67046	2.16431	2.3428e-22	0.04066	-	-
6	rs2647097	T	C	C	0.680739	0.629972	0.735597	2.35077e-22	0.317	-	-
6	rs28380932	A	G	G	1.90132	1.67038	2.16419	2.35957e-22	0.04065	-	-
6	rs28380930	A	G	G	1.90131	1.67037	2.16419	2.36056e-22	0.04064	-	-
6	rs377075184	C	CA	C	1.39643	1.30551	1.49367	2.43635e-22	0.4674	-	-
6	rs9404955	C	T	T	1.40962	1.31535	1.51065	2.44657e-22	0.3001	HLA-A	major histocompatibility complex, class I, A
6	rs28380931	C	T	T	1.90123	1.6702	2.16422	2.48289e-22	0.04065	-	-
6	rs28380846	T	C	C	1.47652	1.36493	1.59723	2.49037e-22	0.1741	-	-
6	rs67192942	T	TCA	T	1.39643	1.30549	1.4937	2.5109e-22	0.4674	-	-
6	rs9272329	A	G	G	0.677751	0.626594	0.733084	2.62284e-22	0.3113	HLA-DQA1	major histocompatibility complex, class II, DQ alpha 1
6	rs4645458	T	C	C	0.68064	0.629803	0.73558	2.63346e-22	0.3148	-	-
6	rs28752988	G	A	A	1.47055	1.36042	1.5896	2.74743e-22	0.1788	-	-
6	rs28380847	G	A	A	1.47585	1.36432	1.59649	2.76631e-22	0.1756	-	-
6	rs28380861	A	G	G	1.47119	1.36085	1.59048	2.84378e-22	0.1781	-	-
6	rs9273015	C	T	T	0.680503	0.62961	0.73551	2.85407e-22	0.3158	HLA-DQA1	major histocompatibility complex, class II, DQ alpha 1
6	rs9273016	A	G	G	0.680503	0.62961	0.73551	2.85407e-22	0.3158	HLA-DQA1	major histocompatibility complex, class II, DQ alpha 1
6	rs9281998	A	AG	AG	0.680543	0.629633	0.735569	2.97525e-22	0.3136	HLA-DQA1	major histocompatibility complex, class II, DQ alpha 1
6	chr6:29832415_A_AT	A	AT	A	1.39383	1.30339	1.49055	2.99281e-22	0.4628	-	-
6	rs4713274	G	C	C	1.40545	1.31202	1.50554	3.09907e-22	0.3049	-	-
6	rs28367855	T	G	G	1.46946	1.35948	1.58834	3.10012e-22	0.1793	-	-
6	rs1065049	C	A	A	0.676329	0.624928	0.731958	3.10125e-22	0.3088	HLA-DQA1	major histocompatibility complex, class II, DQ alpha 1
6	rs28380926	T	C	C	1.47001	1.35986	1.58909	3.18168e-22	0.1786	-	-
6	rs28752964	C	T	T	1.47073	1.36038	1.59003	3.20745e-22	0.1787	-	-
6	rs11752303	G	A	A	1.40526	1.31184	1.50534	3.21937e-22	0.3048	-	-
6	rs9272273	A	G	G	0.681241	0.630346	0.736246	3.36572e-22	0.3145	HLA-DQA1	major histocompatibility complex, class II, DQ alpha 1
6	rs4713275	A	C	C	1.40501	1.3116	1.50507	3.40414e-22	0.305	-	-
6	rs2596507	T	G	G	1.46921	1.35919	1.58814	3.41133e-22	0.1787	-	-
6	rs2571394	A	G	G	1.41016	1.31543	1.51172	3.42106e-22	0.3023	-	-
6	rs28359812	TC	T	T	1.46908	1.35907	1.58798	3.46496e-22	0.179	-	-
6	rs28380879	A	G	G	1.46899	1.35899	1.58789	3.52055e-22	0.179	-	-
6	rs28380881	G	C	C	1.46899	1.35899	1.58789	3.52055e-22	0.179	-	-
6	rs28380882	G	C	C	1.46899	1.35899	1.58789	3.52055e-22	0.179	-	-
6	rs28380890	T	G	G	1.46943	1.35931	1.58847	3.52903e-22	0.1788	-	-
6	rs2571392	G	A	A	1.40711	1.31312	1.50782	3.55072e-22	0.3011	-	-
6	rs4526236	G	A	A	0.681444	0.630542	0.736456	3.56389e-22	0.3258	HLA-DQA1	major histocompatibility complex, class II, DQ alpha 1
6	rs9272314	C	G	G	0.681054	0.630108	0.73612	3.56753e-22	0.3138	HLA-DQA1	major histocompatibility complex, class II, DQ alpha 1
6	rs9272315	T	C	C	0.681054	0.630108	0.73612	3.56753e-22	0.3138	HLA-DQA1	major histocompatibility complex, class II, DQ alpha 1
6	rs2596514	G	A	A	1.46886	1.35887	1.58774	3.5782e-22	0.179	-	-
6	rs2596509	A	G	G	1.46886	1.35887	1.58774	3.5782e-22	0.1788	-	-
6	rs28380862	C	A	A	1.46886	1.35887	1.58774	3.57832e-22	0.179	-	-
6	rs41267238	T	TC	TC	1.40487	1.31144	1.50494	3.58336e-22	0.3049	-	-
6	rs28753022	G	A	A	1.46878	1.3588	1.58766	3.62689e-22	0.179	-	-
6	rs28753023	T	C	C	1.46878	1.3588	1.58766	3.62689e-22	0.179	-	-
6	rs28753051	T	C	C	1.46878	1.3588	1.58766	3.62689e-22	0.179	-	-
6	rs28753054	T	G	G	1.46878	1.3588	1.58766	3.62689e-22	0.179	-	-
6	rs28753056	T	C	C	1.46878	1.3588	1.58766	3.62689e-22	0.179	-	-
6	rs28380871	A	G	G	1.46878	1.3588	1.58766	3.62689e-22	0.179	-	-
6	rs28380872	A	G	G	1.46878	1.3588	1.58766	3.62689e-22	0.179	-	-
6	rs28380873	G	A	A	1.46878	1.3588	1.58766	3.62689e-22	0.179	-	-
6	rs28380874	C	T	T	1.46878	1.3588	1.58766	3.62689e-22	0.179	-	-
6	rs28380876	C	A	A	1.46878	1.3588	1.58766	3.62689e-22	0.179	-	-
6	rs28380877	C	G	G	1.46878	1.3588	1.58766	3.62689e-22	0.179	-	-
6	rs28380883	T	C	C	1.46878	1.3588	1.58766	3.62689e-22	0.179	-	-
6	rs28380884	G	A	A	1.46878	1.3588	1.58766	3.62689e-22	0.179	-	-
6	rs28380888	G	A	A	1.46878	1.3588	1.58766	3.62689e-22	0.179	-	-
6	rs28380891	G	A	A	1.46878	1.3588	1.58766	3.62689e-22	0.179	-	-
6	rs28380892	C	T	T	1.46878	1.3588	1.58766	3.62689e-22	0.179	-	-
6	rs28380893	A	G	G	1.46878	1.3588	1.58766	3.62689e-22	0.179	-	-
6	rs28380894	A	G	G	1.46878	1.3588	1.58766	3.62689e-22	0.179	-	-
6	rs28771419	G	T	T	1.46878	1.3588	1.58766	3.62689e-22	0.179	-	-
6	rs28380895	G	A	A	1.46878	1.3588	1.58766	3.62689e-22	0.179	-	-
6	rs28380896	A	G	G	1.46878	1.3588	1.58766	3.62689e-22	0.179	-	-
6	rs28380897	A	G	G	1.46878	1.3588	1.58766	3.62689e-22	0.179	-	-
6	rs28380903	C	T	T	1.46878	1.3588	1.58766	3.62689e-22	0.179	-	-
6	rs28380905	C	T	T	1.46878	1.3588	1.58766	3.62689e-22	0.179	-	-
6	rs28380906	A	G	G	1.46878	1.3588	1.58766	3.62689e-22	0.179	-	-
6	rs2596525	T	C	C	1.46878	1.3588	1.58766	3.62689e-22	0.179	-	-
6	rs2596523	G	C	C	1.46878	1.3588	1.58766	3.62689e-22	0.179	-	-
6	rs28380914	A	T	T	1.46878	1.3588	1.58766	3.62689e-22	0.179	-	-
6	rs28380915	C	G	G	1.46878	1.3588	1.58766	3.62689e-22	0.179	-	-
6	rs28380916	A	G	G	1.46878	1.3588	1.58766	3.62689e-22	0.179	-	-
6	rs28771373	G	A	A	1.46878	1.3588	1.58766	3.62729e-22	0.179	-	-
6	rs28771374	A	C	C	1.46878	1.3588	1.58766	3.62729e-22	0.179	-	-
6	rs28749490	TTC	T	T	1.46878	1.3588	1.58766	3.62729e-22	0.179	-	-
6	rs28771375	G	T	T	1.46878	1.3588	1.58766	3.62729e-22	0.179	-	-
6	rs28771376	G	A	A	1.46878	1.3588	1.58766	3.62729e-22	0.179	-	-
6	rs28771377	A	T	T	1.46878	1.3588	1.58766	3.62729e-22	0.179	-	-
6	rs28771378	G	A	A	1.46878	1.3588	1.58766	3.62729e-22	0.179	-	-
6	rs28771379	C	T	T	1.46878	1.3588	1.58766	3.62729e-22	0.179	-	-
6	rs28771381	A	G	G	1.46878	1.3588	1.58766	3.62729e-22	0.179	-	-
6	rs28771382	A	G	G	1.46878	1.3588	1.58766	3.62729e-22	0.179	-	-
6	rs28771383	A	G	G	1.46878	1.3588	1.58766	3.62729e-22	0.179	-	-
6	rs28771385	C	T	T	1.46878	1.3588	1.58766	3.62729e-22	0.179	-	-
6	rs28771386	G	A	A	1.46878	1.3588	1.58766	3.62729e-22	0.179	-	-
6	rs28771387	T	C	C	1.46878	1.3588	1.58766	3.62729e-22	0.179	-	-
6	rs28367847	A	C	C	1.46878	1.3588	1.58766	3.62729e-22	0.179	-	-
6	rs28367849	C	A	A	1.46878	1.3588	1.58766	3.62729e-22	0.179	-	-
6	rs28367850	A	G	G	1.46878	1.3588	1.58766	3.62729e-22	0.179	-	-
6	rs28367852	A	C	C	1.46878	1.3588	1.58766	3.62729e-22	0.179	-	-
6	rs28367853	T	C	C	1.46878	1.3588	1.58766	3.62729e-22	0.179	-	-
6	rs28367854	G	A	A	1.46878	1.3588	1.58766	3.62729e-22	0.179	-	-
6	rs28752976	A	T	T	1.46878	1.3588	1.58766	3.62739e-22	0.179	-	-
6	rs28380790	C	A	A	1.46878	1.3588	1.58766	3.6276e-22	0.179	-	-
6	rs28380791	A	C	C	1.46878	1.3588	1.58766	3.6276e-22	0.179	-	-
6	rs28380792	C	T	T	1.46878	1.3588	1.58766	3.6276e-22	0.179	-	-
6	rs28380793	A	G	G	1.46878	1.3588	1.58766	3.6276e-22	0.179	-	-
6	rs28380794	A	T	T	1.46878	1.3588	1.58766	3.6276e-22	0.179	-	-
6	rs28380795	A	C	C	1.46878	1.3588	1.58766	3.6276e-22	0.179	-	-
6	rs28752957	T	C	C	1.46878	1.3588	1.58766	3.6296e-22	0.179	-	-
6	rs28752888	A	G	G	1.46876	1.35878	1.58763	3.62997e-22	0.179	-	-
6	rs28752930	G	A	A	1.46876	1.35878	1.58763	3.62997e-22	0.179	-	-
6	rs28752942	T	G	G	1.46875	1.35878	1.58763	3.63091e-22	0.179	-	-
6	rs28380885	T	A	A	1.46876	1.35878	1.58764	3.64155e-22	0.179	-	-
6	rs28380886	C	G	G	1.46876	1.35878	1.58764	3.64155e-22	0.179	-	-
6	rs28383855	G	GC	GC	1.46876	1.35878	1.58764	3.64394e-22	0.179	-	-
6	rs28367813	T	C	C	1.46876	1.35878	1.58763	3.64453e-22	0.179	-	-
6	rs9272219	G	T	T	0.681728	0.630844	0.736717	3.66215e-22	0.3148	-	-
6	rs28367856	T	A	A	1.46873	1.35875	1.5876	3.66539e-22	0.179	-	-
6	rs9272352	C	G	G	0.681514	0.630604	0.736534	3.67293e-22	0.3145	HLA-DQA1	major histocompatibility complex, class II, DQ alpha 1
6	rs9272327	G	A	A	0.679216	0.628045	0.734557	3.70046e-22	0.312	HLA-DQA1	major histocompatibility complex, class II, DQ alpha 1
6	rs9272325	G	A	A	0.680837	0.629845	0.735959	3.72272e-22	0.3139	HLA-DQA1	major histocompatibility complex, class II, DQ alpha 1
6	rs9273029	G	A	A	0.680943	0.629955	0.736058	3.77379e-22	0.3131	HLA-DQA1	major histocompatibility complex, class II, DQ alpha 1
6	rs9272271	A	T	T	0.681854	0.630967	0.736845	3.78682e-22	0.3148	HLA-DQA1	major histocompatibility complex, class II, DQ alpha 1
6	rs9272272	G	A	A	0.681854	0.630967	0.736845	3.78682e-22	0.3148	HLA-DQA1	major histocompatibility complex, class II, DQ alpha 1
6	rs9272222	G	A	A	0.681854	0.630967	0.736845	3.78682e-22	0.3148	-	-
6	rs9272255	C	T	T	0.681855	0.630965	0.736849	3.80799e-22	0.3148	-	-
6	rs9272261	G	A	A	0.681857	0.630966	0.736851	3.81087e-22	0.3148	HLA-DQA1	major histocompatibility complex, class II, DQ alpha 1
6	rs9272978	C	A	A	0.67963	0.628482	0.73494	3.86457e-22	0.312	HLA-DQA1	major histocompatibility complex, class II, DQ alpha 1
6	rs9272977	C	T	T	0.67963	0.628482	0.73494	3.86515e-22	0.312	HLA-DQA1	major histocompatibility complex, class II, DQ alpha 1
6	rs9273152	A	C	C	0.681379	0.630427	0.736449	3.86796e-22	0.3137	HLA-DQA1	major histocompatibility complex, class II, DQ alpha 1
6	rs9273054	T	C	C	0.681898	0.631005	0.736896	3.86974e-22	0.3146	HLA-DQA1	major histocompatibility complex, class II, DQ alpha 1
6	rs9273055	G	T	T	0.681898	0.631005	0.736896	3.86974e-22	0.3146	HLA-DQA1	major histocompatibility complex, class II, DQ alpha 1
6	rs5002181	T	C	C	0.681912	0.631016	0.736912	3.89733e-22	0.3146	HLA-DQA1	major histocompatibility complex, class II, DQ alpha 1
6	rs5002180	A	T	T	0.681912	0.631017	0.736913	3.89785e-22	0.3146	HLA-DQA1	major histocompatibility complex, class II, DQ alpha 1
6	rs5002179	T	C	C	0.681912	0.631017	0.736913	3.89785e-22	0.3146	HLA-DQA1	major histocompatibility complex, class II, DQ alpha 1
6	rs9273011	T	C	C	0.681912	0.631017	0.736913	3.89785e-22	0.3146	HLA-DQA1	major histocompatibility complex, class II, DQ alpha 1
6	rs9282046	G	GCCGATAAAAAAACAATA	GCCGATAAAAAAACAATA	0.681912	0.631017	0.736913	3.89785e-22	0.3146	HLA-DQA1	major histocompatibility complex, class II, DQ alpha 1
6	rs368229589	AC	A	A	0.681912	0.631017	0.736913	3.89785e-22	0.3146	HLA-DQA1	major histocompatibility complex, class II, DQ alpha 1
6	rs9273035	G	A	A	0.681912	0.631017	0.736913	3.89785e-22	0.3146	HLA-DQA1	major histocompatibility complex, class II, DQ alpha 1
6	rs9273037	G	A	A	0.68192	0.631023	0.736923	3.919e-22	0.3146	HLA-DQA1	major histocompatibility complex, class II, DQ alpha 1
6	rs9272225	G	T	T	0.681944	0.631043	0.736951	3.96526e-22	0.3147	-	-
6	rs28380789	C	T	T	1.46837	1.35839	1.58725	3.99064e-22	0.179	-	-
6	rs9272224	C	T	T	0.681932	0.631024	0.736946	4.0075e-22	0.3146	-	-
6	rs28366070	C	A	A	1.89456	1.66443	2.15651	4.01762e-22	0.04081	-	-
6	rs28380880	A	C	C	1.46952	1.35923	1.58877	4.0264e-22	0.1785	-	-
6	rs28380869	G	C	C	1.46818	1.35824	1.58703	4.03792e-22	0.1791	-	-
6	rs28380870	T	C	C	1.46818	1.35824	1.58703	4.03792e-22	0.1791	-	-
6	rs28366069	G	A	A	1.89447	1.66434	2.15641	4.05467e-22	0.04081	-	-
6	rs28380938	C	T	T	1.89446	1.66434	2.1564	4.05795e-22	0.04081	-	-
6	rs2517892	T	C	T	1.39184	1.30162	1.48832	4.0631e-22	0.4618	-	-
6	rs2254071	T	C	T	1.39184	1.30162	1.48832	4.0631e-22	0.4618	-	-
6	rs28380936	T	C	C	1.89428	1.66418	2.15619	4.10805e-22	0.04077	-	-
6	rs28380937	T	C	C	1.89428	1.66418	2.15619	4.10805e-22	0.04077	-	-
6	rs879498701	TTG	T	T	0.681785	0.630844	0.73684	4.1397e-22	0.3151	-	-
6	rs2734997	G	A	G	1.39189	1.30164	1.4884	4.14647e-22	0.4618	-	-
6	rs9273150	T	C	C	0.681513	0.63054	0.736607	4.15004e-22	0.3138	HLA-DQA1	major histocompatibility complex, class II, DQ alpha 1
6	rs9273151	G	A	A	0.681513	0.63054	0.736607	4.15004e-22	0.3138	HLA-DQA1	major histocompatibility complex, class II, DQ alpha 1
6	rs2517894	A	G	A	1.39184	1.3016	1.48835	4.18243e-22	0.4618	-	-
6	rs2523792	T	C	T	1.39184	1.3016	1.48835	4.18243e-22	0.4618	-	-
6	rs2517889	A	G	A	1.39184	1.3016	1.48835	4.18243e-22	0.4618	-	-
6	rs2523791	C	T	C	1.39184	1.3016	1.48835	4.18243e-22	0.4618	-	-
6	rs2523790	T	G	T	1.39184	1.3016	1.48835	4.18243e-22	0.4618	-	-
6	rs2394179	C	T	C	1.39184	1.3016	1.48835	4.18243e-22	0.4618	-	-
6	rs2735015	T	A	T	1.39184	1.3016	1.48835	4.18243e-22	0.4618	-	-
6	rs2253981	G	A	G	1.39184	1.3016	1.48835	4.18243e-22	0.4618	-	-
6	rs2254077	T	C	T	1.39184	1.3016	1.48835	4.18243e-22	0.4618	-	-
6	rs2523780	A	G	A	1.39184	1.3016	1.48835	4.18243e-22	0.4618	-	-
6	rs2523778	T	C	T	1.39184	1.3016	1.48835	4.18243e-22	0.4618	-	-
6	rs2735005	G	A	G	1.39184	1.3016	1.48835	4.18243e-22	0.4618	-	-
6	rs2735002	A	G	A	1.39184	1.3016	1.48835	4.18243e-22	0.4618	-	-
6	rs34800369	GT	G	GT	1.39186	1.30161	1.48836	4.18311e-22	0.4618	-	-
6	rs2523769	A	C	A	1.39186	1.30161	1.48836	4.18311e-22	0.4618	-	-
6	rs9272014	G	A	A	0.680893	0.629846	0.736078	4.18884e-22	0.3134	-	-
6	rs9273077	A	G	G	0.681979	0.631051	0.737018	4.21446e-22	0.3149	HLA-DQA1	major histocompatibility complex, class II, DQ alpha 1
6	rs9273080	C	T	T	0.681979	0.631051	0.737018	4.21446e-22	0.3149	HLA-DQA1	major histocompatibility complex, class II, DQ alpha 1
6	rs28366071	C	T	T	1.89387	1.66382	2.15573	4.2433e-22	0.04089	-	-
6	rs6929927	T	C	C	1.89387	1.66382	2.15572	4.24389e-22	0.04089	-	-
6	rs551116093	C	G	G	1.8922	1.66262	2.15347	4.29205e-22	0.04115	-	-
6	rs28752996	C	T	T	1.46913	1.35887	1.58835	4.30548e-22	0.1776	-	-
6	rs2508035	T	C	C	1.40384	1.3105	1.50382	4.31014e-22	0.3053	-	-
6	rs2523619	T	C	C	1.46878	1.3586	1.58789	4.32847e-22	0.1792	-	-
6	rs28380858	A	G	G	1.46835	1.35829	1.58734	4.33823e-22	0.1789	-	-
6	rs28380859	A	G	G	1.46835	1.35829	1.58734	4.33823e-22	0.1789	-	-
6	rs28380860	G	C	C	1.46835	1.35829	1.58734	4.33823e-22	0.1789	-	-
6	rs9273012	A	G	G	0.681841	0.630878	0.736921	4.3709e-22	0.315	HLA-DQA1	major histocompatibility complex, class II, DQ alpha 1
6	rs9393984	G	C	C	1.40378	1.31044	1.50376	4.38319e-22	0.3051	-	-
6	rs9357088	G	T	T	1.40378	1.31044	1.50376	4.38319e-22	0.3051	-	-
6	rs9273039	C	T	T	0.682131	0.631193	0.737179	4.43156e-22	0.3145	HLA-DQA1	major histocompatibility complex, class II, DQ alpha 1
6	rs9273041	T	A	A	0.682131	0.631193	0.737179	4.43156e-22	0.3145	HLA-DQA1	major histocompatibility complex, class II, DQ alpha 1
6	rs4713262	A	G	G	1.40751	1.3132	1.5086	4.46805e-22	0.3066	-	-
6	rs9273047	C	T	T	0.682398	0.631486	0.737415	4.47554e-22	0.3148	HLA-DQA1	major histocompatibility complex, class II, DQ alpha 1
6	rs9272249	T	A	A	0.682341	0.63142	0.73737	4.50159e-22	0.3147	-	-
6	rs9272250	A	T	T	0.682341	0.631416	0.737375	4.5371e-22	0.3147	-	-
6	rs9272251	A	G	G	0.682341	0.631416	0.737375	4.5371e-22	0.3147	-	-
6	rs12192286	C	T	T	1.69449	1.5225	1.88592	4.5707e-22	0.07039	-	-
6	rs28367836	A	G	G	1.46837	1.35824	1.58744	4.59393e-22	0.1787	-	-
6	rs28367837	T	C	C	1.46837	1.35823	1.58745	4.61167e-22	0.1787	-	-
6	rs28367859	A	G	G	1.46985	1.35931	1.58939	4.66416e-22	0.177	-	-
6	rs2394182	A	G	A	1.39131	1.3011	1.48778	4.67246e-22	0.4619	-	-
6	rs28380889	A	C	C	1.46755	1.3576	1.5864	4.69824e-22	0.1792	-	-
6	rs9273173	G	A	A	0.682179	0.631198	0.737277	4.86519e-22	0.3148	HLA-DQA1	major histocompatibility complex, class II, DQ alpha 1
6	rs9272274	C	T	T	0.681463	0.630398	0.736666	4.90494e-22	0.3139	HLA-DQA1	major histocompatibility complex, class II, DQ alpha 1
6	rs2394181	A	G	A	1.39111	1.3009	1.48757	4.90637e-22	0.4619	-	-
6	rs2743944	T	C	T	1.39112	1.30091	1.48758	4.90966e-22	0.4619	-	-
6	rs2735021	A	G	A	1.39112	1.30091	1.48758	4.90966e-22	0.4619	-	-
6	rs6907562	G	A	A	1.46745	1.35747	1.58633	4.93431e-22	0.1797	-	-
6	rs28753060	T	C	C	1.46789	1.3578	1.58692	4.95788e-22	0.1785	-	-
6	rs28753061	G	A	A	1.46789	1.3578	1.58692	4.95788e-22	0.1785	-	-
6	rs28753062	T	G	G	1.46789	1.3578	1.58692	4.95788e-22	0.1785	-	-
6	rs28753063	T	C	C	1.46789	1.3578	1.58692	4.95788e-22	0.1785	-	-
6	rs2253955	G	A	G	1.39166	1.30129	1.4883	4.9985e-22	0.4624	-	-
6	rs9272972	C	T	T	0.680974	0.629838	0.736262	5.04725e-22	0.3127	HLA-DQA1	major histocompatibility complex, class II, DQ alpha 1
6	rs9272975	T	A	A	0.680974	0.629839	0.736262	5.04765e-22	0.3127	HLA-DQA1	major histocompatibility complex, class II, DQ alpha 1
6	rs2523786	T	C	T	1.39095	1.30075	1.4874	5.05685e-22	0.462	-	-
6	rs6930065	T	C	C	0.697134	0.647862	0.750154	5.07078e-22	0.3665	-	-
6	rs3903160	G	A	A	1.40336	1.30993	1.50345	5.40082e-22	0.3047	-	-
6	rs28366068	G	A	A	1.88934	1.66009	2.15024	5.41e-22	0.04139	-	-
6	rs2507978	G	A	A	0.717856	0.671063	0.767913	5.49665e-22	0.4971	-	-
6	rs12174396	A	G	G	1.43617	1.33424	1.54588	5.57118e-22	0.2192	MICA	MHC class I polypeptide-related sequence A
6	rs9273068	T	A	A	0.682997	0.632037	0.738065	5.58077e-22	0.3152	HLA-DQA1	major histocompatibility complex, class II, DQ alpha 1
6	rs9273072	C	A	A	0.682997	0.632038	0.738066	5.58275e-22	0.3152	HLA-DQA1	major histocompatibility complex, class II, DQ alpha 1
6	rs9366783	G	C	C	1.43607	1.33415	1.54578	5.67483e-22	0.2192	MICA	MHC class I polypeptide-related sequence A
6	rs28380863	G	A	A	1.46648	1.35659	1.58527	5.74613e-22	0.1788	-	-
6	rs28380913	A	G	G	1.46551	1.35583	1.58407	6.00669e-22	0.18	-	-
6	rs28380917	G	A	A	1.46551	1.35583	1.58407	6.00669e-22	0.18	-	-
6	rs28380918	A	G	G	1.46551	1.35583	1.58407	6.00669e-22	0.18	-	-
6	rs5021841	C	T	T	1.46551	1.35583	1.58407	6.00669e-22	0.18	-	-
6	rs5021842	T	G	G	1.46551	1.35583	1.58407	6.00669e-22	0.18	-	-
6	rs5021843	T	G	G	1.46551	1.35583	1.58407	6.00669e-22	0.18	-	-
6	rs5021844	C	T	T	1.46551	1.35583	1.58407	6.00669e-22	0.18	-	-
6	rs28367848	C	T	T	1.46551	1.35582	1.58407	6.00729e-22	0.18	-	-
6	rs28752958	T	A	A	1.46551	1.35582	1.58407	6.01101e-22	0.18	-	-
6	rs6935487	T	C	C	1.46548	1.3558	1.58404	6.0351e-22	0.18	-	-
6	rs28752876	T	C	C	1.46548	1.3558	1.58404	6.0351e-22	0.18	-	-
6	rs9272236	T	C	C	0.682647	0.631604	0.737816	6.07412e-22	0.3147	-	-
6	rs9272348	C	T	T	0.680901	0.629656	0.736316	6.11512e-22	0.3102	HLA-DQA1	major histocompatibility complex, class II, DQ alpha 1
6	rs11421756	G	GA	GA	1.40451	1.31066	1.50508	6.14478e-22	0.3014	-	-
6	rs9272992	A	G	G	0.675147	0.623255	0.731361	6.15292e-22	0.3032	HLA-DQA1	major histocompatibility complex, class II, DQ alpha 1
6	rs28753064	T	G	G	1.46665	1.35661	1.58561	6.29954e-22	0.1788	-	-
6	rs4947248	T	C	C	1.46497	1.35536	1.58344	6.38627e-22	0.18	-	-
6	rs4713267	C	T	T	1.40135	1.30823	1.50111	6.74503e-22	0.3072	-	-
6	rs2571391	A	C	C	1.40049	1.30756	1.50003	6.94406e-22	0.3	-	-
6	rs13203722	T	C	C	1.68878	1.51765	1.87921	7.08897e-22	0.07069	HLA-C	major histocompatibility complex, class I, C
6	rs13191099	A	G	G	1.68878	1.51765	1.87921	7.08897e-22	0.07068	HLA-C	major histocompatibility complex, class I, C
6	rs72473480	CCTT	C	C	1.68878	1.51764	1.8792	7.09042e-22	0.07069	-	-
6	rs28380908	A	T	T	1.4659	1.35592	1.5848	7.13403e-22	0.179	-	-
6	rs28380909	A	G	G	1.4659	1.35592	1.5848	7.13403e-22	0.179	-	-
6	rs28380910	A	G	G	1.4659	1.35592	1.5848	7.13403e-22	0.179	-	-
6	rs13194791	A	G	G	1.39544	1.30377	1.49356	7.17518e-22	0.3478	LINC02571	long intergenic non-protein coding RNA 2571
6	rs9468973	G	C	C	1.46429	1.35455	1.58292	8.36977e-22	0.1797	-	-
6	rs13218306	C	A	A	1.68628	1.51555	1.87624	8.46682e-22	0.07072	HLA-C	major histocompatibility complex, class I, C
6	rs3873386	T	C	C	0.686564	0.635744	0.741446	9.31583e-22	0.3205	LINC02571	long intergenic non-protein coding RNA 2571
6	rs9259035	G	A	A	1.40048	1.30724	1.50038	9.55737e-22	0.4303	-	-
6	rs28380843	A	G	G	1.46622	1.35577	1.58566	9.97066e-22	0.1777	-	-
6	rs9272332	C	T	T	0.678367	0.626575	0.734439	9.99104e-22	0.3064	HLA-DQA1	major histocompatibility complex, class II, DQ alpha 1
6	rs3128981	A	G	G	2.20835	1.87779	2.59711	1.00777e-21	0.02179	-	-
6	rs9265638	C	T	T	0.681889	0.630491	0.737477	1.00948e-21	0.3115	-	-
6	rs2507975	A	T	A	1.39441	1.30262	1.49267	1.07306e-21	0.3232	-	-
6	rs139336381	C	T	T	1.55005	1.41695	1.69567	1.09501e-21	0.1154	ABHD16A	abhydrolase domain containing 16A, phospholipase
6	rs1634769	G	A	G	0.689352	0.638737	0.743978	1.16669e-21	0.3361	-	-
6	rs28367838	T	C	C	1.46338	1.35347	1.5822	1.19461e-21	0.1789	-	-
6	rs2571393	T	C	C	1.40242	1.30845	1.50314	1.20722e-21	0.3068	-	-
6	rs2517714	C	T	T	1.39847	1.30551	1.49804	1.2148e-21	0.3082	-	-
6	rs28367684	G	C	C	0.687032	0.636121	0.742018	1.22641e-21	0.3193	LINC02571	long intergenic non-protein coding RNA 2571
6	rs9357086	G	C	C	1.39152	1.30032	1.48911	1.25539e-21	0.358	-	-
6	rs2735089	A	G	G	1.40052	1.30698	1.50074	1.27788e-21	0.3082	-	-
6	rs2853975	A	T	T	2.19014	1.86469	2.5724	1.27988e-21	0.02216	MICA	MHC class I polypeptide-related sequence A
6	rs9265940	G	A	G	0.689672	0.639023	0.744336	1.33533e-21	0.3372	-	-
6	rs28753065	C	T	T	1.46358	1.35349	1.58263	1.34663e-21	0.1783	-	-
6	rs9295825	G	A	A	1.39875	1.30562	1.49852	1.35048e-21	0.3055	HCG9	HLA complex group 9
6	rs28753067	G	A	A	1.46356	1.35347	1.58261	1.35206e-21	0.1783	-	-
6	rs28771368	G	A	A	1.46356	1.35347	1.58261	1.35206e-21	0.1783	-	-
6	rs28771369	A	G	G	1.46356	1.35347	1.58261	1.35206e-21	0.1783	-	-
6	rs28753053	A	G	G	1.46086	1.35146	1.5791	1.36999e-21	0.1797	-	-
6	rs2646993	G	T	T	0.680765	0.629068	0.736711	1.38884e-21	0.3093	HLA-DQA1	major histocompatibility complex, class II, DQ alpha 1
6	rs9282045	T	TA	TA	0.684847	0.633596	0.740244	1.44541e-21	0.3188	HLA-DQA1	major histocompatibility complex, class II, DQ alpha 1
6	rs9366750	A	T	T	1.39852	1.30537	1.49831	1.45771e-21	0.3055	HCG9	HLA complex group 9
6	rs41265824	G	T	T	1.39852	1.30537	1.49831	1.45771e-21	0.3055	HCG9	HLA complex group 9
6	rs9273145	T	A	A	0.684913	0.633656	0.740315	1.47992e-21	0.3166	HLA-DQA1	major histocompatibility complex, class II, DQ alpha 1
6	rs3873380	C	T	T	0.685816	0.634661	0.741094	1.48883e-21	0.3143	LINC02571	long intergenic non-protein coding RNA 2571
6	rs4260781	T	C	T	0.690593	0.639962	0.745231	1.58417e-21	0.3397	-	-
6	rs9273023	C	G	G	0.684202	0.632822	0.739754	1.60074e-21	0.3105	HLA-DQA1	major histocompatibility complex, class II, DQ alpha 1
6	rs28367861	G	A	A	1.4624	1.35239	1.58137	1.65151e-21	0.1784	-	-
6	rs2517898	C	G	C	1.38674	1.29645	1.48331	1.75386e-21	0.4528	-	-
6	rs2442753	T	C	C	0.71433	0.666519	0.76557	1.77e-21	0.4397	-	-
6	rs9263993	C	T	T	0.64486	0.589123	0.70587	1.86742e-21	0.2273	-	-
6	rs5021845	C	T	C	0.691373	0.64073	0.74602	1.92459e-21	0.3383	-	-
6	rs28771421	C	T	C	0.691717	0.641087	0.746346	2.02431e-21	0.3391	-	-
6	rs4713279	T	A	A	1.39654	1.30353	1.49618	2.12792e-21	0.3061	HCG9	HLA complex group 9
6	rs9273131	G	T	T	0.685722	0.634344	0.741261	2.2047e-21	0.316	HLA-DQA1	major histocompatibility complex, class II, DQ alpha 1
6	rs9272341	C	A	A	0.679925	0.627868	0.736298	2.25486e-21	0.3052	HLA-DQA1	major histocompatibility complex, class II, DQ alpha 1
6	rs2517702	C	A	A	1.39658	1.30343	1.49637	2.42035e-21	0.3053	-	-
6	rs9391723	A	G	A	0.692336	0.641667	0.747006	2.49556e-21	0.339	-	-
6	rs28380921	A	T	A	0.692336	0.641667	0.747006	2.49556e-21	0.339	-	-
6	rs28771422	G	A	G	0.692158	0.641467	0.746855	2.50007e-21	0.3394	-	-
6	rs2535322	A	G	A	1.46381	1.35293	1.58379	2.5328e-21	0.1808	HCG20	HLA complex group 20	Novel
6	rs2285793	T	C	C	1.5718	1.43143	1.72592	2.65979e-21	0.1038	LINC02829	long intergenic non-protein coding RNA 2829
6	rs28380922	A	C	A	0.692537	0.641839	0.74724	2.75343e-21	0.3388	-	-
6	rs73390208	C	T	C	1.38482	1.29458	1.48136	2.81537e-21	0.4989	HLA-B	major histocompatibility complex, class I, B
6	rs2523623	T	C	T	0.692671	0.641969	0.747376	2.85315e-21	0.3383	-	-
6	rs12195208	C	T	T	1.40232	1.30746	1.50405	3.01333e-21	0.3012	HLA-A	major histocompatibility complex, class I, A
6	rs28367863	G	A	A	1.46188	1.35122	1.58161	3.24593e-21	0.1749	-	-
6	rs1454986355	GC	G	G	1.46265	1.35176	1.58263	3.28958e-21	0.1772	-	-
6	rs1313804925	T	TGTTGAAAATTATAGAA	TGTTGAAAATTATAGAA	1.46243	1.35156	1.58238	3.39226e-21	0.1772	-	-
6	rs4947313	G	T	T	1.66164	1.4955	1.84624	3.4634e-21	0.07228	HLA-B	major histocompatibility complex, class I, B
6	rs2517701	A	T	T	1.39351	1.3008	1.49282	3.49474e-21	0.3072	-	-
6	rs115457991	G	A	A	1.65711	1.49223	1.8402	3.52782e-21	0.07315	-	-
6	rs28380857	G	C	C	1.45828	1.34844	1.57707	3.64272e-21	0.1781	-	-
6	rs9391720	G	A	G	0.693362	0.642566	0.748175	3.96432e-21	0.3388	-	-
6	rs28751323	T	TG	TG	1.46253	1.35136	1.58285	4.30289e-21	0.1717	-	-
6	rs2074489	C	T	T	0.693259	0.64237	0.74818	4.58889e-21	0.328	HLA-C	major histocompatibility complex, class I, C
6	rs3020583	G	A	G	1.38425	1.29358	1.48127	5.07909e-21	0.3276	-	-
6	rs9273018	T	C	C	0.68657	0.634814	0.742546	5.26032e-21	0.3254	HLA-DQA1	major histocompatibility complex, class II, DQ alpha 1
6	rs12524692	T	A	A	1.50539	1.38233	1.63939	5.38365e-21	0.1363	-	-
6	rs9279133	AG	A	A	1.37777	1.28863	1.47308	5.99206e-21	0.4599	-	-
6	rs28771425	A	C	A	0.694398	0.643494	0.74933	6.05525e-21	0.3372	-	-
6	rs147412087	C	T	T	1.65696	1.49112	1.84124	6.27292e-21	0.07222	-	-
6	rs9393953	G	C	C	1.71458	1.53199	1.91893	6.29418e-21	0.06162	-	-
6	rs3131057	T	C	T	1.45828	1.34772	1.5779	6.6844e-21	0.1764	-	-
6	rs9272991	A	T	T	0.681446	0.62889	0.738394	7.53287e-21	0.3001	HLA-DQA1	major histocompatibility complex, class II, DQ alpha 1
6	rs879940295	G	GTT	GTT	0.690635	0.639144	0.746274	7.73914e-21	0.3179	-	-
6	rs13207315	T	C	C	1.67221	1.50159	1.86223	7.74514e-21	0.06996	HLA-C	major histocompatibility complex, class I, C
6	rs13191343	C	T	T	1.67221	1.50158	1.86224	7.77647e-21	0.06996	HLA-C	major histocompatibility complex, class I, C
6	rs9273126	C	T	T	0.68851	0.636762	0.744463	7.80296e-21	0.3128	HLA-DQA1	major histocompatibility complex, class II, DQ alpha 1
6	rs9273116	G	A	A	0.688332	0.636546	0.744331	8.04698e-21	0.3173	HLA-DQA1	major histocompatibility complex, class II, DQ alpha 1
6	rs2734975	C	A	A	1.37577	1.28683	1.47085	8.27819e-21	0.439	-	-
6	rs9366785	G	A	A	1.5338	1.40234	1.67759	8.28308e-21	0.1169	PRRC2A	proline rich coiled-coil 2A	Novel
6	rs117884751	T	A	A	1.50572	1.38196	1.64057	8.58031e-21	0.1333	-	-
6	rs116138399	G	C	C	1.65406	1.48849	1.83806	8.66806e-21	0.07259	HLA-B	major histocompatibility complex, class I, B
6	rs9273164	G	A	A	0.691112	0.639614	0.746757	8.68654e-21	0.3171	HLA-DQA1	major histocompatibility complex, class II, DQ alpha 1
6	rs62396269	G	T	T	1.65406	1.48848	1.83807	8.70569e-21	0.0726	HLA-B	major histocompatibility complex, class I, B
6	rs3997995	C	T	T	1.65625	1.49	1.84104	8.83811e-21	0.07203	HLA-B	major histocompatibility complex, class I, B
6	rs12215963	A	G	G	2.4336	2.0192	2.93305	9.81488e-21	0.01435	POU5F1	POU class 5 homeobox 1	Novel
6	rs1049650	C	G	G	0.679703	0.626741	0.737141	1.07524e-20	0.2825	HLA-C	major histocompatibility complex, class I, C
6	rs114708313	A	T	T	1.4814	1.36396	1.60896	1.10828e-20	0.1503	-	-
6	rs150761055	T	C	C	1.73091	1.5422	1.94271	1.21664e-20	0.05881	-	-
6	rs17192274	A	G	G	0.679699	0.626664	0.737223	1.21882e-20	0.2822	-	-
6	rs115497794	G	A	A	1.4806	1.36323	1.60807	1.23932e-20	0.1503	-	-
6	rs116280898	G	C	C	1.48059	1.36323	1.60807	1.23947e-20	0.1503	-	-
6	rs115860766	C	T	T	1.48055	1.36318	1.60802	1.24946e-20	0.1503	-	-
6	rs2395474	G	A	A	1.64991	1.48485	1.83332	1.27182e-20	0.07257	HLA-B	major histocompatibility complex, class I, B
6	rs9267920	C	T	T	2.05029	1.76244	2.38515	1.37904e-20	0.0268	-	-
6	rs35028179	A	G	G	0.680586	0.62756	0.738092	1.43259e-20	0.2831	HLA-C	major histocompatibility complex, class I, C
6	rs6929963	C	T	T	0.708594	0.658962	0.761964	1.43807e-20	0.378	-	-
6	rs2074488	G	T	T	0.680607	0.627579	0.738116	1.44366e-20	0.2826	HLA-C	major histocompatibility complex, class I, C
6	rs34090104	G	T	T	0.68064	0.62761	0.73815	1.4576e-20	0.2826	HLA-C	major histocompatibility complex, class I, C
6	rs34622008	C	T	T	0.68064	0.627608	0.738152	1.46208e-20	0.2826	HLA-C	major histocompatibility complex, class I, C
6	rs35976302	T	C	C	0.68064	0.627608	0.738152	1.46208e-20	0.2826	HLA-C	major histocompatibility complex, class I, C
6	rs34255701	G	A	A	0.680668	0.627636	0.738181	1.47182e-20	0.2826	HLA-C	major histocompatibility complex, class I, C
6	rs9260034	G	A	A	0.700139	0.649433	0.754804	1.49228e-20	0.3392	-	-
6	rs9260035	C	T	T	0.700139	0.649433	0.754804	1.49228e-20	0.3392	-	-
6	rs35075694	G	A	A	0.679115	0.625888	0.736868	1.50816e-20	0.2804	HLA-C	major histocompatibility complex, class I, C
6	rs9260028	G	A	A	1.37951	1.28887	1.47653	1.72263e-20	0.3292	-	-
6	rs11967243	C	T	T	0.681127	0.62804	0.738701	1.77221e-20	0.2822	-	-
6	rs6919603	A	G	G	0.70559	0.655447	0.759569	1.83188e-20	0.3569	-	-
6	rs9468975	C	T	T	1.45361	1.34304	1.57327	1.91707e-20	0.1726	-	-
6	rs116633868	A	T	T	1.647	1.482	1.83037	1.97027e-20	0.07243	HLA-B	major histocompatibility complex, class I, B
6	rs9260079	T	C	C	1.37872	1.28814	1.47568	1.99852e-20	0.3293	HLA-A	major histocompatibility complex, class I, A
6	rs2734903	G	A	A	1.37872	1.28813	1.47568	2.01366e-20	0.3293	HLA-A	major histocompatibility complex, class I, A
6	rs34887319	G	GC	GC	0.681649	0.628545	0.739238	2.0218e-20	0.2823	HLA-C	major histocompatibility complex, class I, C
6	rs34634498	G	A	A	0.681649	0.628542	0.739243	2.03406e-20	0.2823	HLA-C	major histocompatibility complex, class I, C
6	rs1064991	G	C	C	0.690361	0.638284	0.746686	2.04817e-20	0.3164	HLA-DQA1	major histocompatibility complex, class II, DQ alpha 1
6	rs1056315	C	A	A	0.690697	0.638654	0.74698	2.07157e-20	0.3053	-	-
6	rs12214258	G	T	T	2.3915	1.98842	2.87628	2.07223e-20	0.0148	HCG22	HLA complex group 22 (gene/pseudogene)
6	rs13201872	T	A	A	2.3915	1.98842	2.87629	2.073e-20	0.0148	HCG22	HLA complex group 22 (gene/pseudogene)
6	rs28732148	C	G	G	1.3954	1.30035	1.49739	2.10984e-20	0.2654	-	-
6	rs148875894	ATGGATCT	A	A	1.7627	1.56322	1.98763	2.23188e-20	0.05326	-	-
6	rs9260257	C	T	T	0.702029	0.651318	0.756689	2.28608e-20	0.3402	-	-
6	rs2856698	C	G	G	0.691398	0.639343	0.747692	2.45182e-20	0.3052	HLA-DQB1	major histocompatibility complex, class II, DQ beta 1
6	rs9378200	T	C	C	1.39455	1.29955	1.49648	2.4819e-20	0.265	-	-
6	rs4947244	C	G	G	1.38335	1.29131	1.48194	2.50065e-20	0.3097	-	-
6	rs10456062	G	A	A	2.0253	1.74357	2.35256	2.59309e-20	0.02769	-	-
6	rs41257954	C	T	T	2.41627	2.00353	2.91405	2.67913e-20	0.01431	POU5F1	POU class 5 homeobox 1	Novel
6	rs35438642	C	G	G	0.682365	0.629178	0.740048	2.68858e-20	0.2819	-	-
6	rs34950876	T	G	G	0.682365	0.629174	0.740053	2.70478e-20	0.2819	-	-
6	rs4959039	A	G	G	1.38291	1.29088	1.48149	2.78559e-20	0.3096	-	-
6	rs11964817	A	G	G	0.694211	0.642414	0.750185	2.83186e-20	0.3126	-	-
6	rs28380845	C	T	T	1.45461	1.34322	1.57525	3.00281e-20	0.1726	-	-
6	rs3130303	A	G	G	2.0214	1.74047	2.34767	3.01222e-20	0.02769	-	-
6	rs6908222	G	A	A	0.711937	0.662315	0.765277	3.04763e-20	0.3798	-	-
6	rs4947249	A	G	G	0.711937	0.662315	0.765277	3.04763e-20	0.3798	-	-
6	rs9260044	G	A	A	0.702336	0.651499	0.75714	3.05136e-20	0.3367	-	-
6	rs9279532	CG	C	C	2.02017	1.73949	2.34613	3.161e-20	0.02771	-	-
6	rs10484554	C	T	T	2.00724	1.73071	2.32796	3.17685e-20	0.02798	LINC02571	long intergenic non-protein coding RNA 2571
6	rs2894186	G	C	C	1.37266	1.28319	1.46836	3.22947e-20	0.3536	-	-
6	rs11966716	C	T	T	0.6946	0.642771	0.750608	3.24592e-20	0.3124	-	-
6	rs4959040	C	A	A	1.38252	1.29042	1.48119	3.2932e-20	0.3093	-	-
6	rs9348874	C	T	T	1.50606	1.38034	1.64323	3.33462e-20	0.1302	-	-
6	rs6901158	C	T	T	2.02228	1.74073	2.34936	3.36291e-20	0.02755	-	-
6	rs3134924	G	T	T	2.01869	1.73824	2.34439	3.42912e-20	0.02772	-	-
6	rs9348876	C	T	T	1.39247	1.29768	1.49419	3.44794e-20	0.2657	-	-
6	rs3134925	G	A	A	2.01857	1.73814	2.34424	3.44948e-20	0.02772	-	-
6	rs6918888	G	C	C	2.01843	1.73804	2.34405	3.45468e-20	0.02771	-	-
6	rs9260066	C	T	T	0.703484	0.652679	0.758245	3.71452e-20	0.3385	HLA-A	major histocompatibility complex, class I, A
6	rs9260068	G	A	A	0.703484	0.652679	0.758245	3.71452e-20	0.3385	HLA-A	major histocompatibility complex, class I, A
6	rs9260048	T	G	G	0.703449	0.652638	0.758216	3.7218e-20	0.3385	-	-
6	rs9280783	T	TTC	TTC	0.703479	0.652671	0.758244	3.73176e-20	0.3384	-	-
6	rs451318	G	A	A	0.70348	0.652668	0.758246	3.74679e-20	0.3384	-	-
6	rs9260030	G	A	A	0.70349	0.652679	0.758257	3.75412e-20	0.3384	-	-
6	rs9260031	G	A	A	0.703491	0.65268	0.758257	3.7547e-20	0.3384	-	-
6	rs453325	A	C	C	0.703486	0.652674	0.758253	3.75491e-20	0.3384	-	-
6	rs9260025	C	A	A	0.70349	0.652679	0.758257	3.75572e-20	0.3384	-	-
6	rs3884198	T	TAC	TAC	0.703486	0.652674	0.758254	3.75665e-20	0.3384	-	-
6	rs9260014	C	A	A	0.70355	0.652731	0.758324	3.85303e-20	0.3386	-	-
6	rs36118255	G	C	C	0.695027	0.643142	0.751097	3.90703e-20	0.3125	-	-
6	rs13195617	A	T	T	1.37499	1.28471	1.47163	3.93826e-20	0.3623	-	-
6	rs181752128	G	T	T	1.70096	1.51876	1.90502	3.96371e-20	0.06152	LINC03003	long intergenic non-protein coding RNA 3003
6	rs2074478	C	T	C	0.694999	0.643055	0.751139	4.30091e-20	0.3141	-	-
6	rs28771372	C	T	T	1.44783	1.33783	1.56687	4.33479e-20	0.1777	-	-
6	rs440674	A	G	G	0.703865	0.653014	0.758675	4.36813e-20	0.3382	-	-
6	rs9260388	C	T	T	0.704291	0.653471	0.759063	4.54595e-20	0.3388	-	-
6	rs9380150	T	C	C	1.38022	1.28839	1.4786	4.58649e-20	0.3099	POLR1HASP	POLR1H antisense, pseudogene	Novel
6	rs6930692	C	T	T	0.712937	0.6632	0.766404	4.70809e-20	0.3789	-	-
6	rs118097312	A	C	C	1.52412	1.39276	1.66787	4.99068e-20	0.1159	-	-
6	rs10447394	G	A	A	2.40803	1.99542	2.90595	4.99407e-20	0.01424	-	-
6	rs34314881	G	A	A	0.695869	0.643925	0.752004	5.16495e-20	0.3117	-	-
6	rs35556213	T	A	A	0.695869	0.643925	0.752004	5.16495e-20	0.3117	-	-
6	chr6:31267595_CA_C	CA	C	C	1.98841	1.71642	2.3035	5.26918e-20	0.02827	-	-
6	rs2853953	G	A	A	1.9884	1.71641	2.3035	5.27195e-20	0.02828	-	-
6	rs78179089	C	T	T	0.696282	0.644352	0.752398	5.50272e-20	0.3112	HLA-A	major histocompatibility complex, class I, A
6	rs9260041	C	T	T	0.696286	0.644355	0.752402	5.5056e-20	0.3111	-	-
6	rs402850	T	G	G	0.696284	0.644353	0.752401	5.5141e-20	0.3111	-	-
6	rs9260026	G	A	A	0.696287	0.644355	0.752404	5.52095e-20	0.3111	-	-
6	rs6933352	C	T	T	0.702845	0.651728	0.757972	5.55021e-20	0.3319	-	-
6	rs6930572	A	G	G	2.43285	2.01105	2.94311	5.60088e-20	0.01404	-	-
6	rs9391775	A	C	C	2.43276	2.01099	2.943	5.61486e-20	0.01404	-	-
6	rs2245822	G	A	A	1.98695	1.71517	2.3018	5.7552e-20	0.02833	-	-
6	rs2524111	A	T	T	1.98695	1.71517	2.3018	5.7552e-20	0.02833	-	-
6	rs9264490	A	G	G	1.98695	1.71517	2.3018	5.7552e-20	0.02833	-	-
6	rs2248880	T	C	C	1.98695	1.71517	2.3018	5.7552e-20	0.02833	-	-
6	rs2844625	C	T	T	1.98695	1.71516	2.30181	5.76214e-20	0.02833	-	-
6	rs2853960	G	A	A	1.98695	1.71516	2.30181	5.76214e-20	0.02833	-	-
6	rs2853958	G	T	T	1.98695	1.71516	2.30181	5.76214e-20	0.02833	-	-
6	rs2248902	G	A	A	1.98695	1.71516	2.30181	5.76214e-20	0.02833	-	-
6	rs17197227	C	T	T	2.40475	1.99265	2.90207	5.7665e-20	0.01427	POU5F1	POU class 5 homeobox 1	Novel
6	rs34131062	C	T	T	0.685746	0.632481	0.743498	6.00231e-20	0.2826	HLA-C	major histocompatibility complex, class I, C
6	rs892666	T	C	T	0.712449	0.662502	0.766161	6.10123e-20	0.3908	-	-
6	rs9295826	C	T	T	1.37927	1.28737	1.47773	6.23958e-20	0.3086	POLR1HASP	POLR1H antisense, pseudogene	Novel
6	rs9273019	G	C	C	0.693278	0.640896	0.749941	6.31505e-20	0.3332	HLA-DQA1	major histocompatibility complex, class II, DQ alpha 1
6	rs9260229	A	C	C	0.703554	0.652436	0.758676	6.47399e-20	0.3335	-	-
6	rs36001438	G	A	A	2.40064	1.98938	2.89691	6.59764e-20	0.01429	-	-
6	rs7763052	G	A	A	0.703633	0.652513	0.758757	6.60675e-20	0.3334	-	-
6	rs7763173	G	T	T	0.703619	0.652495	0.758747	6.63015e-20	0.3334	-	-
6	rs6908001	A	C	C	0.713353	0.663467	0.766989	6.72621e-20	0.3784	-	-
6	rs28771371	T	C	C	1.44484	1.33512	1.56359	6.73645e-20	0.1777	-	-
6	rs41315714	C	G	G	1.37084	1.2811	1.46687	6.77372e-20	0.3639	-	-
6	rs117689957	A	G	G	1.52159	1.39043	1.66513	7.07653e-20	0.1148	TNXB	tenascin XB
6	rs12195799	G	A	A	2.42283	2.00332	2.93018	7.34009e-20	0.01407	-	-
6	rs12203909	A	C	C	2.42149	2.00225	2.92851	7.67665e-20	0.01408	-	-
6	rs35482069	G	T	T	0.697584	0.645595	0.753761	7.98503e-20	0.3127	HLA-C	major histocompatibility complex, class I, C
6	rs368552951	GAA	G	G	1.46197	1.34729	1.58642	8.10539e-20	0.156	-	-
6	rs71563311	C	A	A	2.39579	1.98529	2.89118	8.15331e-20	0.01429	POU5F1	POU class 5 homeobox 1	Novel
6	rs34247821	C	T	T	0.697999	0.646016	0.754164	8.60592e-20	0.3129	HLA-C	major histocompatibility complex, class I, C
6	rs6932888	G	C	C	1.36803	1.27879	1.4635	8.61684e-20	0.3826	HLA-G	major histocompatibility complex, class I, G
6	rs6932596	C	T	T	1.36803	1.27879	1.4635	8.61684e-20	0.3826	HLA-G	major histocompatibility complex, class I, G
6	rs71563335	C	A	A	2.40342	1.9896	2.90331	9.41164e-20	0.01423	LINC01149	long intergenic non-protein coding RNA 1149
6	rs34441152	T	C	C	2.40342	1.9896	2.90331	9.41164e-20	0.01423	LINC01149	long intergenic non-protein coding RNA 1149
6	rs12193020	T	C	C	2.40342	1.9896	2.90331	9.41164e-20	0.01423	-	-
6	rs9260610	T	C	C	0.704778	0.653588	0.759977	9.54558e-20	0.3319	-	-
6	rs12200084	G	A	A	1.37706	1.2853	1.47538	9.63368e-20	0.309	RNF39	ring finger protein 39
6	rs9380146	G	A	A	1.36911	1.27946	1.46505	9.72602e-20	0.3638	LOC105375010	uncharacterized LOC105375010
6	rs7745413	T	C	C	0.7048	0.653601	0.76001	9.74176e-20	0.3334	-	-
6	rs2975044	G	A	A	1.36949	1.2797	1.46557	1.00319e-19	0.3356	-	-
6	rs2233940	C	T	T	2.39282	1.98242	2.88818	1.00619e-19	0.01432	-	-
6	rs12206131	A	G	G	2.41186	1.99462	2.91638	1.04251e-19	0.01411	LINC01149	long intergenic non-protein coding RNA 1149
6	rs6908759	A	G	G	0.703743	0.652369	0.759162	1.04324e-19	0.3333	MUC22	mucin 22
6	rs9260334	G	A	A	0.705199	0.654002	0.760404	1.05783e-19	0.3317	-	-
6	rs9260362	C	A	A	0.705199	0.654002	0.760404	1.05783e-19	0.3317	-	-
6	rs9260377	G	A	A	0.705199	0.654002	0.760404	1.05783e-19	0.3317	-	-
6	rs9260381	C	A	A	0.705199	0.654002	0.760404	1.05783e-19	0.3317	-	-
6	rs9260392	T	C	C	0.705199	0.654002	0.760404	1.05783e-19	0.3317	-	-
6	rs9260393	T	G	G	0.705199	0.654002	0.760404	1.05783e-19	0.3317	-	-
6	rs34087996	A	C	C	1.46007	1.34551	1.58437	1.0954e-19	0.1562	-	-
6	rs6457127	T	G	G	1.37608	1.28443	1.47427	1.10727e-19	0.3091	POLR1HASP	POLR1H antisense, pseudogene	Novel
6	rs4711207	C	A	A	1.37601	1.28436	1.47421	1.12491e-19	0.309	POLR1HASP	POLR1H antisense, pseudogene	Novel
6	rs9393987	C	T	T	1.37601	1.28436	1.47421	1.12491e-19	0.309	POLR1HASP	POLR1H antisense, pseudogene	Novel
6	rs10580504	CAA	C	C	1.37601	1.28436	1.47421	1.12491e-19	0.309	POLR1HASP	POLR1H antisense, pseudogene	Novel
6	rs4713281	G	A	A	1.37593	1.28429	1.4741	1.1322e-19	0.3091	POLR1HASP	POLR1H antisense, pseudogene	Novel
6	rs2275855	T	C	C	1.37589	1.28426	1.47406	1.1405e-19	0.3091	-	-
6	rs17192099	G	C	C	0.696573	0.644239	0.753158	1.14877e-19	0.3056	-	-
6	rs17192106	G	T	T	0.696573	0.644239	0.753158	1.14877e-19	0.3056	-	-
6	rs140656257	AC	A	A	0.696573	0.644239	0.753158	1.14877e-19	0.3056	-	-
6	rs72657649	G	T	T	0.696573	0.644239	0.753158	1.14877e-19	0.3056	-	-
6	rs28749137	C	T	T	1.39235	1.29627	1.49554	1.15509e-19	0.2904	HLA-A	major histocompatibility complex, class I, A
6	rs4711206	G	A	A	1.37577	1.28415	1.47392	1.1554e-19	0.3093	POLR1HASP	POLR1H antisense, pseudogene	Novel
6	rs13191519	T	C	C	1.98517	1.71184	2.30213	1.1623e-19	0.02826	LINC02571	long intergenic non-protein coding RNA 2571
6	rs9393988	G	A	A	1.37595	1.28428	1.47417	1.16877e-19	0.3089	POLR1HASP	POLR1H antisense, pseudogene	Novel
6	rs9405044	G	A	A	1.37578	1.28414	1.47396	1.18242e-19	0.3091	POLR1HASP	POLR1H antisense, pseudogene	Novel
6	rs17192225	T	C	C	0.696672	0.644332	0.753264	1.18492e-19	0.3057	-	-
6	rs9295829	A	G	G	1.37519	1.28369	1.47321	1.19863e-19	0.3092	-	-
6	rs6931569	A	G	G	1.98459	1.71134	2.30146	1.20446e-19	0.02824	LINC02571	long intergenic non-protein coding RNA 2571
6	rs9260494	G	A	A	0.705468	0.654227	0.760721	1.20676e-19	0.3317	-	-
6	rs13200571	A	C	C	1.98455	1.7113	2.30142	1.2081e-19	0.02824	LINC02571	long intergenic non-protein coding RNA 2571
6	rs6929408	C	T	T	0.714956	0.66494	0.768734	1.21501e-19	0.3788	-	-
6	rs9348835	A	G	G	1.37544	1.28384	1.47357	1.23432e-19	0.3093	POLR1HASP	POLR1H antisense, pseudogene	Novel
6	rs34176304	CAT	C	C	2.41683	1.99634	2.92589	1.44745e-19	0.01385	-	-
6	rs12196211	A	C	C	2.41438	1.99446	2.92271	1.54169e-19	0.01413	MICB-DT	MICB divergent transcript
6	chr6:31481430_GA_G	GA	G	G	2.41438	1.99446	2.92271	1.54169e-19	0.01413	-	-
6	rs9393989	G	A	A	1.37437	1.28281	1.47247	1.56318e-19	0.309	RNF39	ring finger protein 39
6	rs1632969	T	G	T	0.695105	0.642392	0.752144	1.5875e-19	0.2994	-	-
6	rs9368581	C	T	T	1.72251	1.53091	1.93809	1.59106e-19	0.05576	TRIM27	tripartite motif containing 27
6	rs55883436	A	G	G	2.39879	1.98399	2.9003	1.67319e-19	0.01408	-	-
6	rs114766555	G	A	A	2.41167	1.9923	2.91931	1.68472e-19	0.01415	MICB	MHC class I polypeptide-related sequence B
6	rs12110470	G	T	T	0.70574	0.654311	0.76121	1.75374e-19	0.3333	MUC22	mucin 22
6	rs34606125	CA	C	C	0.719266	0.669602	0.772614	1.76694e-19	0.3881	-	-
6	rs10947050	C	T	T	1.37375	1.28222	1.47182	1.77569e-19	0.309	RNF39	ring finger protein 39
6	rs142184605	CT	C	C	1.44851	1.33649	1.56992	1.83126e-19	0.1719	-	-
6	rs9260060	G	A	A	0.699321	0.647044	0.755821	1.84459e-19	0.3105	HLA-A	major histocompatibility complex, class I, A
6	rs9260061	G	A	A	0.699321	0.647044	0.755821	1.84459e-19	0.3105	HLA-A	major histocompatibility complex, class I, A
6	rs10456057	A	G	G	1.96106	1.69414	2.27004	1.8471e-19	0.02929	-	-
6	rs9260425	T	C	C	0.706634	0.655285	0.762006	1.85904e-19	0.3308	-	-
6	rs4711209	G	A	A	1.37308	1.28164	1.47105	1.93659e-19	0.31	RNF39	ring finger protein 39
6	rs9274659	A	T	A	0.720791	0.671271	0.773963	1.95389e-19	0.3925	HLA-DQB1	major histocompatibility complex, class II, DQ beta 1
6	rs9274657	G	A	G	0.720791	0.671268	0.773966	1.96365e-19	0.3925	HLA-DQB1	major histocompatibility complex, class II, DQ beta 1
6	rs74562547	AGGGTG	A	A	0.686216	0.632246	0.744793	2.0599e-19	0.2759	-	-
6	rs7766469	G	T	T	1.37848	1.28545	1.47824	2.18107e-19	0.3039	POLR1HASP	POLR1H antisense, pseudogene	Novel
6	rs1811197	G	A	A	1.61825	1.45726	1.79703	2.1902e-19	0.07459	-	-
6	rs9357092	G	A	A	1.3722	1.28083	1.47008	2.25405e-19	0.3095	POLR1HASP	POLR1H antisense, pseudogene	Novel
6	rs12191877	C	T	T	1.95227	1.68736	2.25877	2.44158e-19	0.0293	-	-
6	rs9282157	T	TC	T	0.718314	0.66832	0.772048	2.49919e-19	0.397	HLA-DQB1	major histocompatibility complex, class II, DQ beta 1
6	rs9272956	T	G	G	0.698196	0.645528	0.755162	2.76805e-19	0.3264	HLA-DQA1	major histocompatibility complex, class II, DQ alpha 1
6	rs9380142	A	G	G	1.36026	1.27189	1.45478	2.76978e-19	0.3856	HLA-G	major histocompatibility complex, class I, G
6	rs9272953	C	A	A	0.697701	0.64495	0.754766	2.85665e-19	0.3297	HLA-DQA1	major histocompatibility complex, class II, DQ alpha 1
6	rs74552624	ACACTCTCCGGTGAGC	A	A	1.3635	1.27422	1.45903	2.86084e-19	0.3838	-	-
6	rs9272954	C	A	A	0.697842	0.645087	0.754911	2.96145e-19	0.3278	HLA-DQA1	major histocompatibility complex, class II, DQ alpha 1
6	rs13209817	A	G	G	2.3794	1.96875	2.87571	3.01916e-19	0.0142	MICA-AS1	MICA antisense RNA 1
6	rs9393986	T	C	C	1.37019	1.27903	1.46785	3.08466e-19	0.3092	-	-
6	rs9265679	T	G	G	0.712054	0.66104	0.767005	3.43963e-19	0.3686	-	-
6	rs6923313	C	T	C	1.37409	1.2817	1.47313	3.59689e-19	0.2902	HLA-C	major histocompatibility complex, class I, C
6	rs12208205	A	T	T	2.37417	1.96441	2.86941	3.71979e-19	0.01425	LOC105379664	uncharacterized LOC105379664
6	rs12206361	C	T	T	2.37414	1.96438	2.86937	3.72811e-19	0.01426	-	-
6	rs1131114	T	C	C	1.94267	1.67957	2.24699	3.76473e-19	0.02964	HLA-C	major histocompatibility complex, class I, C
6	rs6457057	A	G	G	1.35979	1.2712	1.45455	3.83598e-19	0.385	-	-
6	rs2523409	A	G	G	1.35835	1.27013	1.45269	3.90455e-19	0.3898	-	-
6	rs12193701	A	T	T	2.37267	1.96318	2.86759	3.94294e-19	0.01426	-	-
6	rs12207404	G	A	A	1.94117	1.67827	2.24527	4.14765e-19	0.02964	HLA-C	major histocompatibility complex, class I, C
6	rs1611156	G	A	A	1.35851	1.27018	1.45298	4.17052e-19	0.3873	-	-
6	rs2516517	G	T	T	2.48383	2.03425	3.03275	4.23835e-19	0.01287	-	-
6	rs6934957	C	T	T	1.35841	1.27009	1.45288	4.25688e-19	0.3855	-	-
6	rs13214872	C	G	G	1.94854	1.68313	2.25579	4.28831e-19	0.02929	-	-
6	rs2394173	C	T	T	1.35772	1.2695	1.45207	4.60534e-19	0.3855	-	-
6	rs3910312	A	C	C	1.37018	1.27858	1.46834	4.60976e-19	0.3077	POLR1HASP	POLR1H antisense, pseudogene	Novel
6	rs9468926	C	T	T	0.699458	0.646622	0.756611	4.67502e-19	0.3012	LINC02571	long intergenic non-protein coding RNA 2571
6	rs28367595	G	A	A	0.699649	0.646802	0.756815	4.95091e-19	0.3012	-	-
6	rs9468922	G	A	A	0.699668	0.646818	0.756837	4.99237e-19	0.3011	-	-
6	rs9270487	A	G	G	0.668063	0.611339	0.730049	5.09501e-19	0.2296	HLA-DRB1	major histocompatibility complex, class II, DR beta 1
6	rs6457058	C	T	T	1.35729	1.26908	1.45163	5.10931e-19	0.3856	-	-
6	rs3094642	G	T	T	1.35707	1.26891	1.45136	5.13286e-19	0.3877	-	-
6	rs2743930	T	G	G	1.35716	1.26896	1.45148	5.19813e-19	0.3873	-	-
6	rs2743940	T	C	C	1.35697	1.26882	1.45124	5.21483e-19	0.386	-	-
6	rs2844835	A	G	G	1.35697	1.26881	1.45125	5.26052e-19	0.386	-	-
6	rs2735043	C	T	T	1.35693	1.26878	1.4512	5.26959e-19	0.3876	-	-
6	rs2247422	G	A	A	1.35693	1.26878	1.4512	5.26959e-19	0.3876	-	-
6	rs2743943	C	A	A	1.35694	1.26879	1.45122	5.2825e-19	0.3859	-	-
6	rs2735038	G	A	A	1.35694	1.26879	1.45122	5.2825e-19	0.3859	-	-
6	rs6911139	G	A	A	1.35707	1.26888	1.45139	5.30234e-19	0.3855	-	-
6	rs71563325	G	A	A	2.36681	1.95802	2.86095	5.30863e-19	0.01436	-	-
6	rs2844843	T	C	C	1.35688	1.26874	1.45116	5.32234e-19	0.3876	-	-
6	rs2517930	G	T	T	1.3569	1.26875	1.45118	5.32298e-19	0.3859	-	-
6	rs2517929	A	G	G	1.3569	1.26875	1.45118	5.32308e-19	0.3859	-	-
6	rs7776026	G	A	A	1.35696	1.26879	1.45127	5.35808e-19	0.3856	-	-
6	rs9357085	C	T	T	1.35687	1.26872	1.45114	5.36061e-19	0.3859	-	-
6	rs28724922	CA	C	C	1.35687	1.26872	1.45114	5.36061e-19	0.3859	-	-
6	rs2844841	A	C	C	1.35679	1.26866	1.45105	5.37948e-19	0.3859	-	-
6	rs2743945	T	G	G	1.35679	1.26866	1.45105	5.37948e-19	0.3859	-	-
6	rs2975038	T	A	A	1.35679	1.26865	1.45106	5.42663e-19	0.3859	-	-
6	rs2517928	C	T	T	1.35679	1.26865	1.45106	5.42663e-19	0.3859	-	-
6	rs1611190	A	T	T	1.35675	1.26861	1.45102	5.47396e-19	0.3876	-	-
6	rs2735030	A	C	C	1.35678	1.26861	1.45108	5.60224e-19	0.3874	-	-
6	rs1611173	T	C	C	1.35678	1.26861	1.45108	5.60224e-19	0.3874	-	-
6	rs2743936	T	A	A	1.35678	1.26861	1.45108	5.60224e-19	0.3874	-	-
6	rs9380139	C	T	T	1.35664	1.26851	1.45091	5.60399e-19	0.3859	-	-
6	rs2394688	C	T	T	1.35664	1.26851	1.45091	5.60399e-19	0.3859	-	-
6	rs9366749	G	A	A	1.35664	1.26851	1.45091	5.60491e-19	0.3859	HLA-V	major histocompatibility complex, class I, V (pseudogene)	Novel
6	rs7768875	C	T	T	0.668432	0.611681	0.730449	5.65998e-19	0.2295	-	-
6	rs34977266	GCC	G	G	0.701043	0.648251	0.758135	6.01711e-19	0.3117	-	-
6	rs4628144	T	C	C	0.700147	0.647222	0.7574	6.18499e-19	0.3005	-	-
6	rs12722477	C	A	A	0.697316	0.644019	0.755024	6.28655e-19	0.2907	HLA-G	major histocompatibility complex, class I, G
6	rs2735035	C	T	T	1.35601	1.26791	1.45023	6.34403e-19	0.386	HLA-V	major histocompatibility complex, class I, V (pseudogene)	Novel
6	rs2735049	C	T	T	1.35655	1.26828	1.45095	6.47002e-19	0.3873	-	-
6	rs2844844	T	C	C	1.35647	1.26821	1.45087	6.55783e-19	0.3873	-	-
6	rs34196875	G	C	C	0.656061	0.597788	0.720015	6.60581e-19	0.21	LINC02571	long intergenic non-protein coding RNA 2571
6	rs9380141	T	C	C	1.35605	1.26788	1.45035	6.72084e-19	0.3855	-	-
6	rs28380850	T	A	A	1.44359	1.33122	1.56544	6.72938e-19	0.1682	-	-
6	rs2735048	G	A	A	1.35635	1.2681	1.45075	6.73864e-19	0.3873	-	-
6	rs17192190	A	G	G	0.700998	0.648121	0.75819	6.81338e-19	0.3027	-	-
6	rs3873379	T	C	C	0.700582	0.647618	0.757876	7.16755e-19	0.3003	LINC02571	long intergenic non-protein coding RNA 2571
6	rs2517931	T	A	A	1.35598	1.26776	1.45034	7.17674e-19	0.3874	-	-
6	rs3873374	T	C	C	0.700658	0.64769	0.757957	7.33031e-19	0.3003	-	-
6	rs6910962	C	T	T	0.700658	0.64769	0.757957	7.33031e-19	0.3003	-	-
6	rs9468921	A	G	G	0.700658	0.64769	0.757957	7.33031e-19	0.3003	-	-
6	rs9468923	T	C	C	0.700658	0.64769	0.757957	7.33031e-19	0.3003	-	-
6	rs3906269	G	A	A	0.700658	0.64769	0.757957	7.33031e-19	0.3003	-	-
6	rs9461683	A	G	G	0.700671	0.647702	0.757972	7.36618e-19	0.3003	-	-
6	rs2394963	C	T	T	0.700673	0.647703	0.757976	7.38129e-19	0.3003	-	-
6	rs3906276	T	A	A	0.700691	0.647722	0.757992	7.39729e-19	0.3003	LINC02571	long intergenic non-protein coding RNA 2571
6	rs3909124	G	T	T	0.700691	0.64772	0.757995	7.42047e-19	0.3003	LINC02571	long intergenic non-protein coding RNA 2571
6	rs9468915	A	C	C	0.700743	0.647771	0.758047	7.50876e-19	0.3003	-	-
6	rs9468916	T	C	C	0.700743	0.647771	0.758047	7.50876e-19	0.3003	-	-
6	rs9468917	C	T	T	0.700743	0.647771	0.758047	7.50876e-19	0.3003	-	-
6	rs28367587	G	A	A	0.700743	0.647771	0.758047	7.50876e-19	0.3003	-	-
6	rs28367588	G	A	A	0.700743	0.647771	0.758047	7.50876e-19	0.3003	-	-
6	chr6:31283239_TA_T	TA	T	T	0.700743	0.647771	0.758047	7.50876e-19	0.3003	-	-
6	rs9461681	G	A	A	0.700743	0.647771	0.758047	7.50876e-19	0.3003	-	-
6	rs2394964	C	T	T	0.700744	0.647772	0.758048	7.51004e-19	0.3002	-	-
6	rs2894206	A	T	T	0.700744	0.647772	0.758048	7.51004e-19	0.3002	-	-
6	rs2394965	G	T	T	0.700744	0.647772	0.758048	7.51117e-19	0.3002	-	-
6	rs9468918	T	C	C	0.700744	0.647772	0.758048	7.51117e-19	0.3002	-	-
6	rs34972021	A	G	G	0.672441	0.615965	0.734095	7.55731e-19	0.2364	-	-
6	rs34268928	C	T	T	2.38821	1.97014	2.895	7.55932e-19	0.01407	-	-
6	rs28986792	C	CAA	CAA	1.35528	1.26716	1.44952	7.77813e-19	0.3856	-	-
6	rs35795116	G	A	A	0.671953	0.615371	0.733737	8.10779e-19	0.2357	-	-
6	rs35494442	A	T	T	0.697494	0.644048	0.755376	8.2133e-19	0.2903	-	-
6	rs6902116	A	G	G	0.683387	0.628167	0.74346	8.29757e-19	0.2561	-	-
6	rs12196019	C	A	A	2.35179	1.94623	2.84186	8.35442e-19	0.01431	-	-
6	rs13212987	G	A	A	2.35179	1.94623	2.84186	8.35442e-19	0.01431	-	-
6	rs71561402	T	A	A	2.35179	1.94623	2.84186	8.35442e-19	0.01431	-	-
6	rs13191523	A	G	G	2.35179	1.94623	2.84186	8.35442e-19	0.01431	-	-
6	rs12207025	G	C	C	2.35179	1.94623	2.84186	8.35442e-19	0.01431	-	-
6	rs116399318	T	C	C	2.3517	1.94616	2.84175	8.38925e-19	0.01426	C6orf15	chromosome 6 open reading frame 15
6	rs70987691	TGGGAGGAG	T	T	2.35144	1.94593	2.84145	8.49347e-19	0.01425	-	-
6	rs12197477	C	T	T	2.35144	1.94593	2.84145	8.49347e-19	0.01425	-	-
6	rs72846618	G	T	T	0.69896	0.64566	0.75666	8.75791e-19	0.292	-	-
6	rs28380779	A	G	G	1.43437	1.32424	1.55367	8.76805e-19	0.1764	-	-
6	rs28380780	C	T	T	1.43437	1.32424	1.55367	8.76805e-19	0.1764	-	-
6	rs28380781	T	C	C	1.43437	1.32424	1.55367	8.76805e-19	0.1764	-	-
6	rs72838218	G	A	A	0.699031	0.645725	0.756737	8.95866e-19	0.2919	HLA-G	major histocompatibility complex, class I, G
6	rs2394696	C	T	T	0.699027	0.64572	0.756735	8.97166e-19	0.2919	-	-
6	rs11753654	C	T	T	0.699066	0.645759	0.756773	9.0346e-19	0.2918	-	-
6	rs35734933	T	G	G	0.656764	0.598346	0.720884	9.08437e-19	0.2091	-	-
6	rs3823321	G	A	A	0.699089	0.645781	0.756797	9.08613e-19	0.292	HLA-G	major histocompatibility complex, class I, G
6	rs2394176	G	A	A	0.699051	0.645725	0.75678	9.27496e-19	0.2919	-	-
6	rs2394177	A	G	G	0.699051	0.645725	0.75678	9.27496e-19	0.2919	-	-
6	rs72848310	C	T	T	0.699051	0.645725	0.75678	9.27496e-19	0.2919	-	-
6	rs34468824	C	A	A	0.699051	0.645725	0.75678	9.27496e-19	0.2919	-	-
6	rs35286850	TA	T	T	0.699051	0.645725	0.75678	9.27496e-19	0.2919	-	-
6	rs35726606	G	C	C	0.699051	0.645725	0.75678	9.27496e-19	0.2919	-	-
6	rs35875431	CT	C	C	0.699051	0.645725	0.75678	9.27496e-19	0.2919	-	-
6	rs66472615	T	G	G	0.699051	0.645725	0.756781	9.27527e-19	0.2919	-	-
6	rs17185412	A	G	G	0.699051	0.645725	0.756781	9.27527e-19	0.2919	-	-
6	rs7743930	G	A	A	0.699051	0.645725	0.756781	9.27527e-19	0.2919	-	-
6	rs72838212	A	G	G	0.699045	0.645718	0.756776	9.27964e-19	0.2919	-	-
6	rs72838213	C	T	T	0.699045	0.645718	0.756776	9.28028e-19	0.2919	-	-
6	rs60774155	A	G	G	0.699051	0.645723	0.756783	9.30285e-19	0.2919	-	-
6	rs58060097	TATC	T	T	0.699051	0.645723	0.756783	9.30285e-19	0.2919	-	-
6	rs59832006	T	C	C	0.699051	0.645723	0.756783	9.30285e-19	0.2919	-	-
6	rs34833819	G	A	A	0.699051	0.645723	0.756783	9.30285e-19	0.2919	-	-
6	rs17185377	C	T	T	0.699051	0.645723	0.756783	9.30355e-19	0.2919	-	-
6	rs7743372	A	G	G	0.699051	0.645723	0.756783	9.30355e-19	0.2919	-	-
6	rs66776450	T	C	C	0.699051	0.645723	0.756783	9.30355e-19	0.2919	-	-
6	rs59457386	C	T	T	0.699052	0.645724	0.756784	9.30715e-19	0.2919	-	-
6	rs142459005	A	T	T	1.46692	1.34749	1.59694	9.31113e-19	0.1399	-	-
6	rs7769235	A	C	C	0.699058	0.64573	0.75679	9.32099e-19	0.2919	-	-
6	rs7769357	C	T	T	0.699058	0.64573	0.75679	9.32176e-19	0.2919	-	-
6	rs1611580	A	C	C	1.35422	1.26619	1.44838	9.43558e-19	0.4421	-	-
6	rs61331935	T	A	A	0.699191	0.645851	0.756936	9.7448e-19	0.2919	-	-
6	rs3888720	C	T	T	0.699197	0.645856	0.756943	9.77266e-19	0.2918	-	-
6	rs72492273	A	G	G	0.699197	0.645856	0.756943	9.77266e-19	0.2917	-	-
6	rs67281546	G	A	A	0.699197	0.645856	0.756943	9.77266e-19	0.2917	-	-
6	rs72492275	G	A	A	0.699197	0.645856	0.756943	9.77508e-19	0.2917	-	-
6	rs72846685	G	A	A	0.699201	0.645859	0.756947	9.78788e-19	0.2917	-	-
6	rs77911920	C	T	T	0.699204	0.645862	0.756951	9.79928e-19	0.2917	-	-
6	rs72492279	C	A	A	0.699241	0.645898	0.75699	9.89461e-19	0.2917	-	-
6	rs35446580	T	C	C	0.657111	0.598671	0.721257	9.92769e-19	0.2089	-	-
6	rs17875408	C	T	T	0.700752	0.647601	0.758265	9.93227e-19	0.2957	HLA-G	major histocompatibility complex, class I, G
6	rs34023488	C	T	T	0.657878	0.599522	0.721914	9.96223e-19	0.2103	LINC02571	long intergenic non-protein coding RNA 2571
6	rs60503702	G	GT	GT	0.699325	0.645972	0.757085	1.02156e-18	0.2917	-	-
6	rs7754443	G	A	A	0.701809	0.648776	0.759178	1.02339e-18	0.3003	-	-
6	rs72492280	G	A	A	0.699421	0.646078	0.757167	1.02367e-18	0.2918	HLA-G	major histocompatibility complex, class I, G
6	rs10456390	C	T	T	2.34624	1.9417	2.83507	1.02683e-18	0.01434	-	-
6	rs72492276	C	G	G	0.699334	0.645973	0.757102	1.03525e-18	0.2917	-	-
6	rs12197587	G	A	A	2.34615	1.9416	2.835	1.03722e-18	0.01433	-	-
6	rs3882582	T	C	C	0.69866	0.645206	0.756543	1.04639e-18	0.2917	-	-
6	rs3882583	G	A	A	0.69866	0.645206	0.756543	1.04639e-18	0.2917	-	-
6	rs58749093	C	T	T	2.35207	1.94536	2.84381	1.04751e-18	0.01428	-	-
6	rs8192588	G	A	A	2.3815	1.96423	2.88741	1.0572e-18	0.01384	NOTCH4	notch receptor 4
6	rs9264765	A	G	G	0.72901	0.679578	0.782036	1.11713e-18	0.4113	-	-
6	rs9267088	T	A	A	2.28713	1.90291	2.74893	1.18114e-18	0.01606	LINC01149	long intergenic non-protein coding RNA 1149
6	rs138847230	CTCAGTTTG	C	C	0.699812	0.646423	0.75761	1.18813e-18	0.2917	-	-
6	rs1625907	G	C	G	1.35292	1.26498	1.44697	1.2009e-18	0.395	HLA-G	major histocompatibility complex, class I, G
6	rs3873375	C	T	T	0.702903	0.649905	0.760223	1.20693e-18	0.3008	-	-
6	rs9265561	A	G	G	0.687101	0.632089	0.746901	1.2092e-18	0.2609	-	-
6	rs3094560	A	G	G	1.35266	1.26477	1.44665	1.21682e-18	0.3903	-	-
6	rs9265548	T	C	C	0.687193	0.632178	0.746996	1.23655e-18	0.2627	-	-
6	rs9264764	T	C	C	0.729326	0.679875	0.782374	1.2409e-18	0.4112	-	-
6	rs17190134	C	G	G	2.34762	1.94153	2.83866	1.28935e-18	0.01419	HCG22	HLA complex group 22 (gene/pseudogene)
6	rs17192554	A	G	G	0.729707	0.680267	0.782741	1.33166e-18	0.4124	LINC02571	long intergenic non-protein coding RNA 2571
6	rs17198923	C	T	T	0.729751	0.680308	0.782787	1.34973e-18	0.4124	LINC02571	long intergenic non-protein coding RNA 2571
6	rs33941312	T	C	C	2.34656	1.9406	2.83745	1.35795e-18	0.01421	-	-
6	chr6:29828349_A_AC	A	AC	A	1.35223	1.26434	1.44622	1.36262e-18	0.3951	-	-
6	rs9391630	A	G	G	1.35315	1.265	1.44744	1.3687e-18	0.3823	-	-
6	rs11753629	G	A	A	0.701887	0.648671	0.759467	1.37501e-18	0.2957	-	-
6	rs12191595	T	C	C	2.34638	1.94042	2.83728	1.37815e-18	0.01422	PSORS1C1	psoriasis susceptibility 1 candidate 1
6	rs2394250	G	T	G	0.720707	0.669975	0.77528	1.43618e-18	0.3627	HCG9	HLA complex group 9
6	rs2517887	G	C	C	0.701233	0.647901	0.758954	1.44375e-18	0.2937	-	-
6	rs2523812	T	C	C	1.3538	1.26539	1.44839	1.48885e-18	0.3888	HCP5B	HLA complex P5B
6	rs11310284	GC	G	G	1.35147	1.26369	1.44534	1.49309e-18	0.3935	-	-
6	rs1736927	A	C	A	1.35121	1.26347	1.44503	1.5322e-18	0.3914	HLA-G	major histocompatibility complex, class I, G
6	rs6905975	C	G	G	0.721385	0.670704	0.775896	1.53721e-18	0.3626	HLA-DQB1-AS1	HLA-DQB1 antisense RNA 1	Novel
6	rs1626038	T	C	T	1.35121	1.26344	1.44507	1.57271e-18	0.3914	HLA-G	major histocompatibility complex, class I, G
6	rs9265549	G	A	A	0.688297	0.633185	0.748206	1.75073e-18	0.2628	-	-
6	rs9265540	C	T	T	0.690502	0.635663	0.750072	1.7635e-18	0.2652	-	-
6	rs12202207	C	T	T	2.33902	1.93447	2.82818	1.78343e-18	0.01422	-	-
6	rs2253487	G	A	A	0.73054	0.68102	0.783662	1.83781e-18	0.4114	-	-
6	rs2523754	A	G	G	1.35083	1.26298	1.44479	1.87236e-18	0.3932	-	-
6	rs2735046	G	A	A	1.35083	1.26295	1.44482	1.92219e-18	0.3932	-	-
6	rs2523753	A	G	G	1.35083	1.26295	1.44482	1.92219e-18	0.3932	-	-
6	rs9265569	G	A	A	0.690072	0.635114	0.749785	1.93905e-18	0.2629	-	-
6	rs9265568	C	T	T	0.690072	0.635114	0.749785	1.93906e-18	0.2629	-	-
6	rs12664131	T	A	A	1.39315	1.29346	1.50051	2.07053e-18	0.2213	-	-
6	rs28993462	CAG	C	C	2.20412	1.84663	2.63082	2.07485e-18	0.01826	TNXB	tenascin XB
6	rs9265560	C	G	G	0.690237	0.635236	0.749999	2.12924e-18	0.2626	-	-
6	rs9265624	C	A	A	0.689798	0.634736	0.749636	2.14802e-18	0.2621	-	-
6	rs2853941	T	C	C	0.730982	0.681413	0.784156	2.19686e-18	0.4112	-	-
6	rs2734998	C	G	G	0.702763	0.649337	0.760585	2.25555e-18	0.2937	-	-
6	rs9265559	C	G	G	0.690622	0.635624	0.75038	2.28073e-18	0.2627	-	-
6	rs2743937	T	C	C	0.702811	0.649384	0.760634	2.28083e-18	0.2937	-	-
6	rs9265562	G	A	A	0.690623	0.635625	0.75038	2.28107e-18	0.2627	-	-
6	rs9265566	A	T	T	0.690623	0.635625	0.750381	2.28112e-18	0.2627	-	-
6	rs6938680	G	A	A	0.690628	0.63563	0.750384	2.28122e-18	0.2627	-	-
6	rs6938855	A	C	C	0.690628	0.63563	0.750384	2.28122e-18	0.2627	-	-
6	rs9265614	T	A	A	0.690628	0.63563	0.750384	2.28122e-18	0.2627	-	-
6	rs9265618	C	T	T	0.690628	0.63563	0.750384	2.28122e-18	0.2627	-	-
6	rs9265627	T	C	C	0.690628	0.63563	0.750384	2.28122e-18	0.2627	-	-
6	rs9265545	T	C	C	0.69064	0.635641	0.750399	2.29177e-18	0.2627	-	-
6	rs9265546	G	A	A	0.69064	0.635641	0.750399	2.29177e-18	0.2627	-	-
6	rs9265547	G	C	C	0.69064	0.635641	0.750399	2.29177e-18	0.2627	-	-
6	rs9265543	G	A	A	0.69064	0.635641	0.750399	2.29192e-18	0.2627	-	-
6	rs2735014	C	A	A	0.702828	0.649398	0.760653	2.29582e-18	0.2937	-	-
6	rs9265525	C	T	T	0.690653	0.635648	0.750418	2.31629e-18	0.2627	-	-
6	rs200358110	AT	A	A	0.690653	0.635648	0.750418	2.31646e-18	0.2627	-	-
6	rs9258538	C	T	T	0.702917	0.649488	0.760742	2.33636e-18	0.2936	-	-
6	rs12194905	C	T	T	2.37088	1.95359	2.87731	2.33716e-18	0.01386	C2	complement C2
6	rs2734996	T	A	A	0.702932	0.649501	0.760758	2.34938e-18	0.2936	-	-
6	rs6908808	C	T	T	0.664442	0.606232	0.728242	2.34987e-18	0.2146	-	-
6	rs2523793	C	T	T	0.702917	0.649484	0.760747	2.35047e-18	0.2936	-	-
6	rs2517890	A	C	C	0.702917	0.649484	0.760747	2.35047e-18	0.2936	-	-
6	rs2735019	C	A	A	0.702917	0.649484	0.760747	2.35047e-18	0.2936	-	-
6	rs2735011	T	C	C	0.702917	0.649484	0.760747	2.35047e-18	0.2936	-	-
6	rs2735009	G	A	A	0.702917	0.649484	0.760747	2.35047e-18	0.2936	-	-
6	rs2735004	T	C	C	0.702917	0.649484	0.760747	2.35047e-18	0.2936	-	-
6	rs58551057	TTATAA	T	T	0.702917	0.649484	0.760747	2.35047e-18	0.2936	-	-
6	rs2735003	T	G	G	0.702917	0.649484	0.760747	2.35047e-18	0.2936	-	-
6	rs28565959	C	G	G	0.702917	0.649484	0.760747	2.35047e-18	0.2936	-	-
6	rs77114005	T	C	C	0.664449	0.606239	0.728248	2.35077e-18	0.2146	-	-
6	rs9270611	C	T	T	0.67066	0.613183	0.733524	2.35473e-18	0.225	-	-
6	rs9280720	C	CT	CT	0.702939	0.649504	0.76077	2.36527e-18	0.2936	-	-
6	rs2523777	C	T	T	0.702919	0.649481	0.760754	2.36852e-18	0.2936	-	-
6	rs9258537	G	A	A	0.702939	0.649503	0.760771	2.37131e-18	0.2936	-	-
6	rs2523774	C	T	T	0.702933	0.649494	0.760769	2.37768e-18	0.2936	-	-
6	rs12213831	G	A	A	2.32626	1.92489	2.81132	2.39494e-18	0.01452	MICA	MHC class I polypeptide-related sequence A
6	rs2735006	A	T	T	0.70297	0.649529	0.760808	2.40236e-18	0.2936	-	-
6	rs2523773	C	T	T	0.703008	0.649562	0.760851	2.43872e-18	0.2936	-	-
6	rs9267734	G	A	A	2.36892	1.95196	2.87495	2.52254e-18	0.01385	C2	complement C2
6	rs12201301	G	A	A	2.32983	1.92676	2.81721	2.61324e-18	0.01432	-	-
6	rs28380849	T	C	C	1.43115	1.32044	1.55113	2.6134e-18	0.171	-	-
6	rs13196409	G	A	A	2.36742	1.95074	2.8731	2.66127e-18	0.01388	SKIC2	SKI2 subunit of superkiller complex	Novel
6	rs35009002	A	C	C	2.3671	1.95051	2.87267	2.67495e-18	0.0139	EHMT2	euchromatic histone lysine methyltransferase 2	Novel
6	rs35214850	A	C	C	2.19818	1.84162	2.62377	2.72462e-18	0.01825	TNXB	tenascin XB
6	rs2077580	G	A	A	2.19818	1.84162	2.62377	2.72462e-18	0.01825	TNXB	tenascin XB
6	rs28993459	ACT	A	A	2.19818	1.84162	2.62377	2.72462e-18	0.01825	TNXB	tenascin XB
6	rs12196385	G	A	A	2.19818	1.84162	2.62377	2.72462e-18	0.01825	TNXB	tenascin XB
6	rs12198173	G	A	A	2.19818	1.84162	2.62377	2.72462e-18	0.01825	TNXB	tenascin XB
6	rs204884	G	A	A	2.19818	1.84162	2.62377	2.72462e-18	0.01825	TNXB	tenascin XB
6	rs71536108	CTCCAGGAAGCCT	C	C	2.19804	1.84149	2.62362	2.74858e-18	0.01823	TNXB	tenascin XB
6	rs204881	C	T	T	2.19804	1.84149	2.62362	2.74965e-18	0.01823	TNXB	tenascin XB
6	rs12211410	C	T	T	2.19804	1.84149	2.62362	2.74965e-18	0.01823	TNXB	tenascin XB
6	rs9265552	C	G	G	0.690725	0.635604	0.750626	2.77954e-18	0.2626	-	-
6	rs12662617	C	A	A	1.39171	1.29203	1.49909	2.86974e-18	0.221	-	-
6	rs34249798	G	T	T	2.32371	1.92234	2.80887	2.90256e-18	0.01497	-	-
6	rs1476570	G	A	A	0.704401	0.651012	0.762168	2.94854e-18	0.2954	-	-
6	rs17201431	T	C	C	2.36416	1.94815	2.86901	2.95281e-18	0.01392	CFB	complement factor B
6	rs765909841	ACC	A	A	0.691871	0.636847	0.751648	2.9833e-18	0.2634	-	-
6	rs9380237	G	A	A	1.34659	1.25939	1.43983	2.99138e-18	0.3954	LINC02571	long intergenic non-protein coding RNA 2571
6	rs2517886	G	T	T	0.703813	0.650302	0.761727	3.15189e-18	0.2934	-	-
6	rs28380848	C	T	T	1.42957	1.31905	1.54934	3.16628e-18	0.1712	-	-
6	rs9265554	A	G	G	0.691778	0.636679	0.751645	3.27262e-18	0.2627	-	-
6	rs13199524	C	T	T	2.19389	1.83802	2.61867	3.30417e-18	0.01833	TNXB	tenascin XB
6	rs2735000	T	C	C	0.704211	0.650716	0.762104	3.32954e-18	0.2942	-	-
6	rs9265644	T	C	C	0.691776	0.636661	0.751662	3.34777e-18	0.263	-	-
6	rs147352225	C	T	T	1.6824	1.49619	1.89178	3.55093e-18	0.05807	-	-
6	rs2735008	G	A	A	0.704446	0.650934	0.762357	3.57563e-18	0.2939	-	-
6	rs1736933	A	C	A	1.34652	1.25909	1.44001	3.73844e-18	0.3972	HLA-G	major histocompatibility complex, class I, G
6	rs28732107	G	A	A	1.90752	1.64881	2.20683	3.80809e-18	0.03022	-	-
6	rs34214527	C	T	T	2.1909	1.83541	2.61523	3.85817e-18	0.0183	-	-
6	rs1736932	C	G	C	1.3465	1.25903	1.44004	3.89567e-18	0.3934	HLA-G	major histocompatibility complex, class I, G
6	rs1632943	C	A	C	1.34646	1.259	1.44001	3.9281e-18	0.3935	HLA-G	major histocompatibility complex, class I, G
6	rs35875104	T	C	C	2.31527	1.91541	2.7986	4.00133e-18	0.01502	EHMT2	euchromatic histone lysine methyltransferase 2	Novel
6	rs4084764	G	T	T	1.34742	1.25958	1.44139	4.33548e-18	0.3823	-	-
6	rs1632937	G	C	G	1.34566	1.25828	1.43911	4.43236e-18	0.3971	HLA-G	major histocompatibility complex, class I, G
6	rs2249863	T	G	T	1.34535	1.25797	1.4388	4.8094e-18	0.3971	HLA-G	major histocompatibility complex, class I, G
6	rs1632941	T	C	T	1.34513	1.25779	1.43853	4.87503e-18	0.3972	HLA-G	major histocompatibility complex, class I, G
6	rs1632939	G	A	G	1.34513	1.25779	1.43853	4.87503e-18	0.3972	HLA-G	major histocompatibility complex, class I, G
6	rs1233333	G	A	G	1.34525	1.25787	1.43869	4.88954e-18	0.3972	HLA-G	major histocompatibility complex, class I, G
6	rs1736920	A	G	A	1.34511	1.25776	1.43853	4.9525e-18	0.3934	HLA-G	major histocompatibility complex, class I, G
6	rs1130363	A	G	A	1.34511	1.25776	1.43853	4.9525e-18	0.3934	HLA-G	major histocompatibility complex, class I, G
6	rs915669	G	T	G	1.34511	1.25776	1.43853	4.9525e-18	0.3934	HLA-G	major histocompatibility complex, class I, G
6	rs1063320	C	G	C	1.34511	1.25776	1.43853	4.9525e-18	0.3934	HLA-G	major histocompatibility complex, class I, G
6	rs1130355	G	A	G	1.34513	1.25776	1.43856	5.00271e-18	0.3972	HLA-G	major histocompatibility complex, class I, G
6	rs1736923	A	G	A	1.34513	1.25776	1.43856	5.00271e-18	0.3972	HLA-G	major histocompatibility complex, class I, G
6	rs1632934	T	C	T	1.34513	1.25776	1.43856	5.00271e-18	0.3972	HLA-G	major histocompatibility complex, class I, G
6	rs1632933	C	T	C	1.34513	1.25776	1.43856	5.00271e-18	0.3972	HLA-G	major histocompatibility complex, class I, G
6	rs1736912	A	G	A	1.34513	1.25776	1.43856	5.00271e-18	0.3972	HLA-G	major histocompatibility complex, class I, G
6	rs1632932	G	A	G	1.34512	1.25775	1.43855	5.01353e-18	0.3972	HLA-G	major histocompatibility complex, class I, G
6	rs1625035	C	T	C	1.34511	1.25773	1.43856	5.08016e-18	0.3934	HLA-G	major histocompatibility complex, class I, G
6	rs1632942	T	C	T	1.34511	1.25773	1.43856	5.08016e-18	0.3934	HLA-G	major histocompatibility complex, class I, G
6	rs915668	C	G	C	1.34511	1.25773	1.43856	5.08016e-18	0.3934	HLA-G	major histocompatibility complex, class I, G
6	rs1710	G	C	G	1.34511	1.25773	1.43856	5.08016e-18	0.3934	HLA-G	major histocompatibility complex, class I, G
6	rs35674592	G	T	G	1.34505	1.25769	1.43848	5.08161e-18	0.3972	HLA-G	major histocompatibility complex, class I, G
6	rs1632944	G	A	G	1.34505	1.25769	1.43847	5.08366e-18	0.3972	HLA-G	major histocompatibility complex, class I, G
6	rs2735022	A	G	A	1.34502	1.25766	1.43845	5.10894e-18	0.3972	HLA-G	major histocompatibility complex, class I, G
6	rs1624337	G	A	G	1.34502	1.25766	1.43845	5.10968e-18	0.3976	HLA-G	major histocompatibility complex, class I, G
6	rs3893463	C	T	T	0.717958	0.666033	0.773933	5.12687e-18	0.3336	-	-
6	rs67585040	AC	A	A	0.660102	0.600801	0.725256	5.21715e-18	0.2069	HLA-DQA1	major histocompatibility complex, class II, DQ alpha 1
6	rs7452226	A	G	A	0.727248	0.676577	0.781715	5.47085e-18	0.3804	-	-
6	rs9265636	C	G	G	0.69229	0.63688	0.752522	5.628e-18	0.2599	-	-
6	rs7766089	G	A	G	1.3538	1.26386	1.45014	5.82196e-18	0.4782	-	-
6	rs80002776	C	G	G	1.69615	1.50446	1.91226	5.87658e-18	0.05433	-	-
6	rs9271500	C	T	C	0.742373	0.693823	0.79432	5.98221e-18	0.4796	-	-
6	rs9271501	A	G	A	0.742373	0.693823	0.79432	5.98221e-18	0.4796	-	-
6	rs887468	C	T	T	1.90845	1.64799	2.21007	5.99574e-18	0.02997	PSORS1C3	psoriasis susceptibility 1 candidate 3
6	rs9272176	C	T	T	0.666615	0.607969	0.730918	6.06198e-18	0.2123	-	-
6	rs9272173	T	C	C	0.666631	0.607986	0.730932	6.06963e-18	0.2123	-	-
6	rs9272178	C	G	G	0.666631	0.607986	0.730932	6.06963e-18	0.2123	-	-
6	rs9272181	G	A	A	0.666631	0.607986	0.730932	6.06963e-18	0.2123	-	-
6	rs9272184	T	C	C	0.666631	0.607986	0.730932	6.06963e-18	0.2123	-	-
6	rs1630223	G	A	G	1.34432	1.25696	1.43775	6.07238e-18	0.3972	HLA-G	major histocompatibility complex, class I, G
6	rs9272177	T	C	C	0.666636	0.607991	0.730939	6.08216e-18	0.2123	-	-
6	rs9271546	T	C	T	0.742045	0.693431	0.794067	6.13874e-18	0.4804	-	-
6	rs1630185	G	A	G	1.34427	1.2569	1.43771	6.19414e-18	0.3972	HLA-G	major histocompatibility complex, class I, G
6	rs9271547	C	A	C	0.742045	0.693418	0.794081	6.26551e-18	0.4804	-	-
6	rs2107195	A	G	G	2.05524	1.74476	2.42097	6.62825e-18	0.02295	TRIM15	tripartite motif containing 15
6	rs17179122	A	T	T	0.703265	0.649166	0.761872	6.72698e-18	0.2854	-	-
6	rs9272311	G	A	A	0.660024	0.600502	0.725445	6.91778e-18	0.2058	HLA-DQA1	major histocompatibility complex, class II, DQ alpha 1
6	rs71845112	TACAA	T	T	2.34893	1.93415	2.85267	7.03314e-18	0.01392	-	-
6	rs9259033	T	C	C	1.36991	1.27523	1.47162	7.09573e-18	-9	-	-
6	rs2516647	T	G	T	1.34476	1.2571	1.43853	7.12036e-18	0.3619	-	-
6	rs9278333	CA	C	CA	1.34378	1.25634	1.4373	7.47469e-18	0.3971	HLA-G	major histocompatibility complex, class I, G
6	rs17188743	A	G	G	0.672078	0.613916	0.735751	7.66561e-18	0.2186	-	-
6	rs112114238	G	A	A	2.34607	1.93182	2.84916	7.78636e-18	0.01393	-	-
6	rs12193582	G	A	A	2.34607	1.93182	2.84916	7.78636e-18	0.01393	-	-
6	rs12207158	A	T	T	2.34594	1.93167	2.84904	7.87779e-18	0.01393	VARS1	valyl-tRNA synthetase 1	Novel
6	rs9393927	C	G	G	1.69278	1.50144	1.9085	7.89782e-18	0.05439	-	-
6	rs200449009	TCCCGGGCGCCTC	T	T	2.33964	1.92764	2.83972	7.93431e-18	0.01372	-	-
6	rs71563368	G	A	A	2.34683	1.93218	2.85046	7.9687e-18	0.01395	VARS1	valyl-tRNA synthetase 1	Novel
6	rs11753309	C	A	A	1.5668	1.41438	1.73564	7.99784e-18	0.08089	-	-
6	rs12213415	G	A	A	2.34553	1.93132	2.84858	8.02971e-18	0.01393	VARS1	valyl-tRNA synthetase 1	Novel
6	rs34442639	TG	T	T	2.34553	1.93132	2.84858	8.02971e-18	0.01393	-	-
6	rs3763317	C	T	C	0.73706	0.687541	0.790146	8.13007e-18	0.4252	BTNL2	butyrophilin like 2
6	rs6457302	T	C	T	1.34167	1.25471	1.43464	8.15034e-18	0.4774	MUC22	mucin 22
6	rs6457303	A	G	A	1.34167	1.25471	1.43464	8.15034e-18	0.4774	MUC22	mucin 22
6	rs4713421	A	C	A	1.34158	1.25461	1.43459	8.50258e-18	0.4774	MUC22	mucin 22
6	rs41313179	A	ATCT	A	0.743026	0.694353	0.795112	8.50506e-18	0.4751	-	-
6	rs9271599	A	C	A	0.743026	0.694353	0.795112	8.50506e-18	0.4751	-	-
6	rs9271573	A	C	A	0.743039	0.694365	0.795125	8.53724e-18	0.4751	-	-
6	rs9271593	C	T	C	0.743039	0.694365	0.795125	8.53724e-18	0.4751	-	-
6	rs9281959	A	AC	AC	0.664726	0.605584	0.729643	8.7078e-18	0.2089	-	-
6	rs9271427	A	G	G	0.667916	0.609151	0.73235	8.76138e-18	0.2121	-	-
6	rs151115972	C	CA	CA	1.46267	1.34103	1.59534	9.14587e-18	0.1307	-	-
6	rs34241101	G	T	T	2.17577	1.82185	2.59843	9.2743e-18	0.01835	SKIC2	SKI2 subunit of superkiller complex	Novel
6	rs4448084	C	G	G	2.33327	1.92278	2.83138	9.30911e-18	0.01404	SLC44A4	solute carrier family 44 member 4	Novel
6	rs16867582	C	A	A	2.34126	1.92783	2.84336	9.36923e-18	0.01394	-	-
6	rs2734966	T	G	G	1.34179	1.25462	1.43503	9.62447e-18	0.391	HCP5B	HLA complex P5B
6	rs9260809	A	G	G	0.720186	0.668134	0.776294	9.8628e-18	0.3351	HCG9	HLA complex group 9
6	rs17195089	G	A	A	0.672379	0.61405	0.736247	1.00595e-17	0.218	-	-
6	rs12662618	T	C	C	0.705165	0.651033	0.763798	1.01627e-17	0.2861	-	-
6	rs4713422	G	C	G	1.34092	1.25392	1.43396	1.02529e-17	0.4789	MUC22	mucin 22
6	rs79244724	C	G	G	2.31572	1.91104	2.80609	1.04659e-17	0.01393	GTF2H4	general transcription factor IIH subunit 4	Novel
6	rs117474927	C	T	T	1.42157	1.31162	1.54073	1.08092e-17	0.1701	ABCF1	ATP binding cassette subfamily F member 1
6	rs11966200	C	T	T	2.32899	1.91929	2.82616	1.08783e-17	0.01406	SLC44A4	solute carrier family 44 member 4	Novel
6	rs9271443	A	C	C	0.668154	0.609248	0.732755	1.09691e-17	0.2117	-	-
6	rs9272065	T	G	G	0.668589	0.609731	0.733128	1.10347e-17	0.211	-	-
6	rs142282930	C	A	A	2.31421	1.90981	2.80425	1.10593e-17	0.01393	VARS2	valyl-tRNA synthetase 2, mitochondrial	Novel
6	rs2734967	T	A	A	1.34159	1.25432	1.43494	1.10678e-17	0.3902	-	-
6	rs140221142	T	A	A	2.09755	1.77037	2.4852	1.1136e-17	0.02024	-	-
6	rs118062293	C	T	T	1.46074	1.33935	1.59313	1.11829e-17	0.1307	LY6G6D	lymphocyte antigen 6 family member G6D
6	rs9265620	T	C	C	0.699341	0.644364	0.759009	1.12087e-17	0.2694	MUCL3	mucin like 3	Novel
6	rs17195068	C	G	G	0.670274	0.611607	0.734569	1.12314e-17	0.2136	DXO	decapping exoribonuclease
6	rs1632947	G	A	G	1.34054	1.25353	1.43359	1.13755e-17	0.3984	PPT2	palmitoyl-protein thioesterase 2
6	rs151062068	G	T	T	2.3135	1.90919	2.80345	1.14475e-17	0.01393	EGFL8	EGF like domain multiple 8
6	rs1632946	C	T	C	1.34062	1.25358	1.43371	1.14813e-17	0.3984	HLA-G	major histocompatibility complex, class I, G
6	rs143786605	C	T	T	2.31308	1.90889	2.80286	1.15147e-17	0.01393	-	-
6	rs10947121	T	C	T	1.34032	1.25335	1.43333	1.16076e-17	0.4774	MUC22	mucin 22
6	rs13217108	C	T	T	2.32627	1.91717	2.82266	1.17562e-17	0.014	HSPA1A/HSPA1B	heat shock protein family A (Hsp70) member 1A
6	rs3218822	T	C	C	2.31157	1.90765	2.80102	1.21772e-17	0.01394	-	-
6	rs2734960	T	C	C	1.34052	1.25342	1.43366	1.2264e-17	0.3905	-	-
6	rs2516420	C	T	T	2.28188	1.88862	2.75702	1.24704e-17	0.01509	MICB-DT	MICB divergent transcript
6	rs2239888	T	C	C	1.41971	1.31007	1.53852	1.26824e-17	0.1715	-	-
6	rs73727137	C	T	T	2.31018	1.90651	2.79933	1.28328e-17	0.01395	-	-
6	rs9272145	A	G	G	0.669111	0.610193	0.733718	1.29877e-17	0.2109	-	-
6	rs2734968	G	A	A	1.34026	1.25316	1.43341	1.31251e-17	0.391	-	-
6	rs1132408	C	A	A	2.30877	1.90535	2.79759	1.35046e-17	0.01395	-	-
6	rs9272066	C	A	A	0.66936	0.610438	0.733969	1.35816e-17	0.2109	-	-
6	rs9391844	A	G	G	1.35618	1.26457	1.45443	1.36314e-17	0.2824	-	-
6	rs9391845	C	G	G	1.35618	1.26457	1.45443	1.36314e-17	0.2824	-	-
6	rs7758472	G	A	A	0.669376	0.610451	0.733989	1.36714e-17	0.2109	-	-
6	rs2516421	C	T	T	2.28008	1.88703	2.75501	1.36777e-17	0.0151	MICB-DT	MICB divergent transcript
6	rs12661041	C	G	G	0.70611	0.651891	0.764839	1.38045e-17	0.2854	-	-
6	rs150097334	TG	T	T	0.669127	0.610163	0.733789	1.38272e-17	0.2107	HLA-DQA1	major histocompatibility complex, class II, DQ alpha 1
6	rs115787103	T	A	A	0.669127	0.610163	0.733789	1.38272e-17	0.2107	HLA-DQA1	major histocompatibility complex, class II, DQ alpha 1
6	rs148474360	ACT	A	A	1.69488	1.50151	1.91316	1.38747e-17	0.05305	-	-
6	rs879816137	GACC	G	G	0.669431	0.610502	0.734049	1.38779e-17	0.2109	-	-
6	rs6929044	T	C	C	0.669431	0.610502	0.734049	1.38779e-17	0.2109	-	-
6	rs6929398	A	G	G	0.669431	0.610502	0.734049	1.38779e-17	0.2109	-	-
6	rs7758465	T	A	A	0.669431	0.610502	0.734049	1.38779e-17	0.2109	-	-
6	rs9272052	A	G	G	0.669431	0.610502	0.734049	1.38779e-17	0.2109	-	-
6	rs9272058	T	C	C	0.669431	0.610502	0.734049	1.38779e-17	0.2109	-	-
6	rs9272060	G	A	A	0.669431	0.610502	0.734049	1.38779e-17	0.2109	-	-
6	rs117133761	T	G	G	1.46922	1.345	1.60491	1.38929e-17	0.1267	-	-
6	rs114527826	G	T	T	0.669439	0.610509	0.734058	1.39117e-17	0.2109	-	-
6	rs74291249	G	A	A	0.66944	0.610509	0.73406	1.39246e-17	0.2109	-	-
6	rs3134946	C	G	G	2.10339	1.77321	2.49504	1.4068e-17	0.02045	-	-
6	rs2523819	C	T	T	1.33967	1.25265	1.43275	1.42697e-17	0.3905	-	-
6	rs9272326	C	T	T	0.666521	0.607215	0.731619	1.43323e-17	0.2084	HLA-DQA1	major histocompatibility complex, class II, DQ alpha 1
6	rs2844821	T	C	C	1.33907	1.2522	1.43196	1.43474e-17	0.3907	-	-
6	rs9281907	G	GA	GA	0.672591	0.614015	0.736755	1.44645e-17	0.217	-	-
6	rs10456397	A	T	T	2.32838	1.91743	2.82741	1.45825e-17	0.01409	-	-
6	rs9271790	G	A	A	0.669387	0.610412	0.73406	1.46248e-17	0.2107	-	-
6	rs9271524	A	C	C	0.669139	0.610128	0.733857	1.47252e-17	0.2115	-	-
6	rs3132580	G	A	A	2.30666	1.90353	2.79517	1.48962e-17	0.01407	MUCL3	mucin like 3	Novel
6	rs3132581	G	A	A	2.30666	1.90353	2.79517	1.49007e-17	0.01406	-	-
6	rs3094086	G	A	A	2.30666	1.90353	2.79517	1.49007e-17	0.01414	-	-
6	rs1736938	A	G	A	1.33927	1.25229	1.43229	1.50942e-17	0.3984	HLA-G	major histocompatibility complex, class I, G
6	rs9271612	A	G	G	0.669528	0.610543	0.734213	1.51667e-17	0.2108	-	-
6	rs9271613	C	T	T	0.669528	0.610543	0.734213	1.51667e-17	0.2108	-	-
6	rs9272351	G	A	A	0.668842	0.609768	0.733639	1.52651e-17	0.2096	HLA-DQA1	major histocompatibility complex, class II, DQ alpha 1
6	rs1736940	G	A	G	1.33927	1.25227	1.43231	1.53581e-17	0.3946	HLA-G	major histocompatibility complex, class I, G
6	rs2523615	C	T	T	1.7017	1.50589	1.92298	1.54702e-17	0.05168	-	-
6	rs1632951	T	G	T	1.33928	1.25227	1.43233	1.54704e-17	0.3984	HLA-G	major histocompatibility complex, class I, G
6	rs3135003	C	T	T	0.6696	0.610608	0.734292	1.54756e-17	0.2108	-	-
6	rs1736936	G	A	G	1.33927	1.25226	1.43232	1.54907e-17	0.3984	HLA-G	major histocompatibility complex, class I, G
6	rs1610677	T	C	T	1.33979	1.25263	1.43302	1.55596e-17	0.3989	-	-
6	rs9272260	T	A	A	0.669878	0.610909	0.73454	1.56977e-17	0.2108	HLA-DQA1	major histocompatibility complex, class II, DQ alpha 1
6	rs114104101	T	C	C	0.669878	0.610909	0.73454	1.56977e-17	0.2108	HLA-DQA1	major histocompatibility complex, class II, DQ alpha 1
6	rs9272243	A	G	G	0.669878	0.610909	0.73454	1.56977e-17	0.2108	-	-
6	rs9272246	G	C	C	0.669878	0.610909	0.73454	1.56977e-17	0.2108	-	-
6	rs9272253	G	T	T	0.669878	0.610909	0.73454	1.56977e-17	0.2108	-	-
6	rs9272256	T	C	C	0.669878	0.610909	0.73454	1.56977e-17	0.2108	-	-
6	rs1611169	T	C	T	1.33928	1.25225	1.43235	1.57346e-17	0.3946	-	-
6	rs1632948	T	C	T	1.33926	1.25224	1.43234	1.57491e-17	0.3946	HLA-G	major histocompatibility complex, class I, G
6	rs9272262	A	T	T	0.669878	0.610905	0.734545	1.57803e-17	0.2108	HLA-DQA1	major histocompatibility complex, class II, DQ alpha 1
6	rs9272264	A	G	G	0.669878	0.610905	0.734545	1.57803e-17	0.2108	HLA-DQA1	major histocompatibility complex, class II, DQ alpha 1
6	rs9272269	G	A	A	0.669878	0.610905	0.734545	1.57803e-17	0.2108	HLA-DQA1	major histocompatibility complex, class II, DQ alpha 1
6	rs115852844	G	A	A	0.669878	0.610905	0.734545	1.57803e-17	0.2108	HLA-DQA1	major histocompatibility complex, class II, DQ alpha 1
6	rs9272123	C	T	T	0.669878	0.610905	0.734545	1.57803e-17	0.2108	-	-
6	rs9272133	G	A	A	0.669878	0.610905	0.734545	1.57803e-17	0.2108	-	-
6	rs9272188	C	G	G	0.669878	0.610905	0.734545	1.57803e-17	0.2108	-	-
6	rs9272230	C	A	A	0.669878	0.610905	0.734545	1.57803e-17	0.2108	-	-
6	rs9272240	G	A	A	0.669878	0.610905	0.734545	1.57803e-17	0.2108	-	-
6	rs9272241	G	A	A	0.669878	0.610905	0.734545	1.57803e-17	0.2108	-	-
6	rs33939413	GCAGCCCCT	G	G	0.669878	0.610905	0.734545	1.57803e-17	0.2108	-	-
6	rs9272244	G	T	T	0.669878	0.610905	0.734545	1.57803e-17	0.2108	-	-
6	rs9272247	G	A	A	0.669878	0.610905	0.734545	1.57803e-17	0.2108	-	-
6	rs9272248	G	A	A	0.669878	0.610905	0.734545	1.57803e-17	0.2108	-	-
6	rs1736935	A	G	A	1.33925	1.25222	1.43232	1.58032e-17	0.3946	HLA-G	major histocompatibility complex, class I, G
6	rs1611165	T	C	T	1.33924	1.25222	1.43232	1.58373e-17	0.3946	-	-
6	rs17207867	G	T	T	2.16373	1.81176	2.58408	1.5841e-17	0.01843	DXO	decapping exoribonuclease
6	rs1625361	T	C	T	1.33942	1.25233	1.43258	1.61068e-17	0.3922	-	-
6	rs1611164	T	C	T	1.33914	1.25212	1.43221	1.61307e-17	0.3946	-	-
6	rs9357123	G	A	A	1.36994	1.27423	1.47285	1.62591e-17	0.2464	LINC02571	long intergenic non-protein coding RNA 2571
6	rs4394274	C	A	A	0.737143	0.687186	0.790731	1.62875e-17	0.4094	-	-
6	rs9272220	G	A	A	0.66979	0.610778	0.734504	1.63711e-17	0.2106	-	-
6	rs2975035	C	G	G	1.33902	1.25201	1.43209	1.65999e-17	0.3902	LOC105375010	uncharacterized LOC105375010
6	rs1611680	A	G	G	1.33894	1.25193	1.432	1.6846e-17	0.3923	LOC105375010	uncharacterized LOC105375010
6	rs1611702	A	G	G	1.33894	1.25193	1.432	1.6846e-17	0.3923	-	-
6	rs1611715	A	C	C	1.33894	1.25193	1.432	1.6846e-17	0.3923	-	-
6	rs2975034	G	A	A	1.33897	1.25195	1.43204	1.68952e-17	0.3905	LOC105375010	uncharacterized LOC105375010
6	rs184352447	A	T	T	2.30355	1.90088	2.79151	1.70532e-17	0.01409	-	-
6	rs1611149	C	T	C	1.33867	1.25172	1.43167	1.70893e-17	0.3944	-	-
6	rs2975033	G	A	A	1.3389	1.25188	1.43196	1.71278e-17	0.3905	LOC105375010	uncharacterized LOC105375010
6	rs2517840	C	T	T	1.33889	1.25187	1.43195	1.71571e-17	0.3905	LOC105375010	uncharacterized LOC105375010
6	rs2523822	A	G	G	1.33889	1.25187	1.43195	1.71571e-17	0.3905	-	-
6	rs3134608	T	G	G	2.10388	1.77269	2.49695	1.72602e-17	0.02034	PRRT1	proline rich transmembrane protein 1	Novel
6	rs2734972	T	C	C	1.33883	1.25182	1.43189	1.73231e-17	0.3904	-	-
6	rs2523614	T	C	C	1.70028	1.50462	1.92139	1.74423e-17	0.05177	-	-
6	rs1610680	G	A	G	1.33865	1.25168	1.43167	1.75146e-17	0.3984	-	-
6	rs1611157	C	T	C	1.33865	1.25167	1.43168	1.7661e-17	0.3984	-	-
6	rs1610679	C	T	C	1.33865	1.25167	1.43168	1.7661e-17	0.3984	-	-
6	rs1611160	C	T	C	1.33865	1.25167	1.43168	1.7661e-17	0.3984	-	-
6	rs2249571	A	G	A	1.33856	1.2516	1.43157	1.76878e-17	0.3987	-	-
6	rs2157605	T	C	C	0.678812	0.620847	0.742189	1.7882e-17	0.2286	-	-
6	rs1611154	A	C	A	1.33856	1.25156	1.43161	1.82833e-17	0.3946	-	-
6	rs1611704	C	T	T	1.33851	1.25151	1.43156	1.8535e-17	0.3921	-	-
6	rs9272063	C	T	T	0.671474	0.612567	0.736045	1.86408e-17	0.2108	-	-
6	rs199578624	GC	G	G	2.2719	1.8803	2.74506	1.86914e-17	0.01515	MICB	MHC class I polypeptide-related sequence B
6	rs114861390	T	A	A	2.2719	1.8803	2.74506	1.86914e-17	0.01515	MICB	MHC class I polypeptide-related sequence B
6	rs2516497	G	T	T	2.2719	1.8803	2.74506	1.86914e-17	0.01515	MICB	MHC class I polypeptide-related sequence B
6	rs9271792	C	T	T	0.670364	0.611317	0.735114	1.87547e-17	0.2105	-	-
6	rs2523599	C	G	C	1.33476	1.24878	1.42667	1.91186e-17	0.4505	HLA-C	major histocompatibility complex, class I, C
6	rs28724925	TA	T	T	1.33804	1.25114	1.43099	1.91331e-17	0.392	-	-
6	rs12661061	G	A	A	0.708012	0.653809	0.766709	1.9435e-17	0.2862	-	-
6	rs9272275	C	T	T	0.669912	0.610778	0.734771	1.95441e-17	0.2099	HLA-DQA1	major histocompatibility complex, class II, DQ alpha 1
6	rs2523420	G	T	T	1.33809	1.25114	1.43107	1.9555e-17	0.3905	-	-
6	rs9348883	T	A	A	1.4933	1.36135	1.63804	1.97207e-17	0.1085	-	-
6	rs3115627	A	G	G	1.33788	1.25096	1.43084	2.01434e-17	0.3922	LOC105375010	uncharacterized LOC105375010
6	rs3094643	G	A	A	1.33765	1.25074	1.43059	2.10547e-17	0.3922	LOC105375010	uncharacterized LOC105375010
6	rs2734982	G	T	T	1.3376	1.25069	1.43055	2.14205e-17	0.3905	LOC105375010	uncharacterized LOC105375010
6	rs12661066	C	T	T	0.708392	0.654159	0.767121	2.17761e-17	0.2875	-	-
6	rs2905756	A	C	C	1.3375	1.2506	1.43045	2.18561e-17	0.3905	LOC105375010	uncharacterized LOC105375010
6	rs9281986	A	AG	AG	0.669901	0.610675	0.73487	2.19617e-17	0.2104	-	-
6	rs1610678	T	C	T	1.33724	1.25039	1.43013	2.21944e-17	0.3946	-	-
6	rs1633077	A	G	A	1.33719	1.25035	1.43006	2.22475e-17	0.3946	-	-
6	rs2394180	T	C	C	0.708763	0.654566	0.767448	2.22644e-17	0.2871	-	-
6	rs9281374	T	TGGA	T	1.33904	1.25167	1.43251	2.24288e-17	0.3573	-	-
6	rs1736944	C	T	C	1.33724	1.25037	1.43015	2.25595e-17	0.3946	-	-
6	rs1633040	A	G	A	1.33724	1.25037	1.43015	2.25595e-17	0.3946	-	-
6	rs1736943	T	C	T	1.33724	1.25037	1.43015	2.25595e-17	0.3946	-	-
6	rs1610676	C	T	C	1.33724	1.25037	1.43015	2.25595e-17	0.3946	-	-
6	rs2442726	G	T	G	1.33895	1.25159	1.4324	2.26835e-17	0.3573	-	-
6	rs2735027	A	G	A	1.33719	1.25032	1.43009	2.27979e-17	0.3946	-	-
6	rs1736947	C	T	C	1.33719	1.25032	1.43009	2.27979e-17	0.3946	-	-
6	rs1633053	A	G	A	1.33719	1.25032	1.43009	2.27979e-17	0.3946	-	-
6	rs2442725	T	C	T	1.33892	1.25156	1.43238	2.29727e-17	0.3573	-	-
6	rs9272233	G	A	A	0.67047	0.611275	0.735397	2.30959e-17	0.2107	-	-
6	rs9272234	G	A	A	0.67047	0.611275	0.735397	2.30959e-17	0.2107	-	-
6	rs1620202	G	A	G	1.33709	1.25023	1.42999	2.31862e-17	0.3947	-	-
6	rs2770	G	A	G	0.724013	0.671918	0.780148	2.32231e-17	0.3411	HLA-B	major histocompatibility complex, class I, B
6	rs3134944	C	T	T	2.09709	1.76702	2.48883	2.3475e-17	0.02045	-	-
6	rs4993667	T	A	T	1.33699	1.25013	1.42988	2.3638e-17	0.3948	-	-
6	rs4993665	C	T	C	1.33699	1.25013	1.42988	2.3638e-17	0.3948	-	-
6	rs2517937	A	G	A	1.33698	1.25012	1.42986	2.36987e-17	0.3947	-	-
6	rs1611475	A	T	A	1.33698	1.25012	1.42986	2.37001e-17	0.3948	-	-
6	rs3128914	T	A	T	1.33698	1.25012	1.42986	2.37001e-17	0.3948	-	-
6	chr6:29842537_AT_A	AT	A	A	0.709103	0.654902	0.76779	2.38689e-17	0.2871	-	-
6	rs9271545	C	T	T	0.6717	0.612623	0.736475	2.41261e-17	0.2109	-	-
6	rs9271352	T	C	C	0.671702	0.612624	0.736476	2.41353e-17	0.2108	-	-
6	rs9271473	G	C	C	0.671703	0.612626	0.736478	2.41438e-17	0.2109	-	-
6	rs9271528	C	T	T	0.671703	0.612626	0.736478	2.41438e-17	0.2109	-	-
6	rs9271541	A	C	C	0.671703	0.612626	0.736478	2.41438e-17	0.2109	-	-
6	rs13201101	C	T	T	1.49422	1.36164	1.63971	2.41813e-17	0.1075	TSBP1-AS1	TSBP1 and BTNL2 antisense RNA 1
6	rs3134947	C	T	T	2.0962	1.76626	2.48776	2.44829e-17	0.02045	-	-
6	rs3132965	A	G	G	2.09618	1.76624	2.48775	2.45134e-17	0.02045	-	-
6	rs17188729	G	A	A	0.6726	0.613615	0.737254	2.46913e-17	0.2119	-	-
6	rs446049	A	T	T	1.33706	1.25013	1.43003	2.47469e-17	0.3922	-	-
6	rs9271895	T	C	C	0.672031	0.612974	0.736778	2.47685e-17	0.2111	-	-
6	rs3134945	C	A	A	2.09594	1.76604	2.48747	2.48054e-17	0.02045	-	-
6	rs9271428	C	T	T	0.671815	0.612727	0.736601	2.49026e-17	0.2109	-	-
6	rs9272356	C	T	T	0.67076	0.611522	0.735735	2.55428e-17	0.2094	HLA-DQA1	major histocompatibility complex, class II, DQ alpha 1
6	rs71565347	G	A	A	2.33143	1.91645	2.83627	2.57778e-17	0.01363	-	-
6	rs28383857	G	GA	GA	1.42261	1.31109	1.54362	2.61377e-17	0.1706	-	-
6	rs71552094	C	CG	CG	2.31245	1.90429	2.80811	2.66122e-17	0.01404	NEU1	neuraminidase 1	Novel
6	rs11961665	C	T	T	2.31245	1.90429	2.80811	2.66122e-17	0.01404	-	-
6	rs115462985	G	A	A	2.28976	1.88983	2.77432	2.70303e-17	0.01417	-	-
6	rs3129763	G	A	A	0.672107	0.612988	0.736927	2.71444e-17	0.2106	-	-
6	rs11753296	G	A	A	0.709527	0.655292	0.768251	2.71691e-17	0.287	-	-
6	rs2596471	A	G	A	1.39233	1.28953	1.50334	2.7449e-17	0.2165	-	-
6	rs12193866	C	T	T	2.28945	1.88956	2.77397	2.74491e-17	0.01417	MUC22	mucin 22
6	rs7755063	A	T	T	0.70962	0.655386	0.768343	2.76214e-17	0.287	-	-
6	rs59641053	A	G	G	0.70962	0.655386	0.768343	2.76214e-17	0.287	-	-
6	rs2523763	G	A	A	1.33597	1.24922	1.42874	2.7674e-17	0.393	LOC105375010	uncharacterized LOC105375010
6	rs6457066	C	A	A	0.709609	0.65537	0.768336	2.77323e-17	0.287	-	-
6	chr6:29842019_GTA_G	GTA	G	G	0.709613	0.655374	0.768341	2.77585e-17	0.287	-	-
6	rs9272238	C	T	T	0.672182	0.613054	0.737012	2.7771e-17	0.2108	-	-
6	rs9295821	A	G	G	1.33587	1.24914	1.42862	2.78192e-17	0.3913	-	-
6	rs72838286	G	A	A	0.70962	0.65538	0.76835	2.78497e-17	0.287	-	-
6	rs72838293	T	C	C	0.70962	0.65538	0.76835	2.78497e-17	0.287	-	-
6	rs7754512	T	A	A	0.70962	0.65538	0.76835	2.78497e-17	0.287	-	-
6	rs7772553	C	A	A	0.70962	0.65538	0.76835	2.78497e-17	0.287	-	-
6	rs77350728	CA	C	C	0.70962	0.65538	0.76835	2.78497e-17	0.287	-	-
6	rs17179115	A	T	T	0.70962	0.65538	0.76835	2.78497e-17	0.287	-	-
6	rs17185545	G	A	A	0.70962	0.65538	0.76835	2.78497e-17	0.287	-	-
6	rs72838299	A	T	T	0.70962	0.65538	0.76835	2.78497e-17	0.287	-	-
6	rs72838302	G	A	A	0.70962	0.65538	0.76835	2.78497e-17	0.287	-	-
6	rs61569152	A	C	C	0.70962	0.65538	0.76835	2.78497e-17	0.287	-	-
6	rs915667	A	G	A	1.33518	1.24864	1.42771	2.79246e-17	0.4023	HLA-G	major histocompatibility complex, class I, G
6	rs9380143	C	T	T	1.33587	1.24913	1.42864	2.82645e-17	0.3913	-	-
6	rs9380145	G	C	C	1.33587	1.24913	1.42864	2.82645e-17	0.3913	-	-
6	rs4713250	G	T	T	1.33587	1.24913	1.42864	2.82645e-17	0.3913	-	-
6	rs12662231	G	C	C	0.709676	0.655427	0.768414	2.84618e-17	0.287	-	-
6	rs2734987	C	G	G	1.3358	1.24906	1.42856	2.85759e-17	0.393	LOC105375010	uncharacterized LOC105375010
6	rs17189826	G	A	A	2.28699	1.88757	2.77094	2.99163e-17	0.01416	-	-
6	rs67164457	C	G	G	0.709963	0.655713	0.768701	3.01322e-17	0.2904	-	-
6	rs12110912	C	A	A	0.699508	0.643834	0.759997	3.02651e-17	0.2627	LINC02571	long intergenic non-protein coding RNA 2571
6	rs9348862	T	C	C	1.36569	1.27039	1.46813	3.03822e-17	0.2486	-	-
6	rs4713325	C	G	G	0.67558	0.616791	0.739973	3.09405e-17	0.2147	-	-
6	rs16899147	A	G	G	1.36522	1.27003	1.46756	3.13033e-17	0.2485	-	-
6	rs5014817	A	G	G	0.739288	0.689203	0.793013	3.18952e-17	0.4096	-	-
6	rs3134949	C	T	T	2.08933	1.76069	2.47931	3.20471e-17	0.02045	-	-
6	rs9267815	A	G	G	2.08933	1.76069	2.47931	3.20471e-17	0.02045	-	-
6	rs3096689	C	G	G	2.08933	1.76069	2.47931	3.20471e-17	0.02045	-	-
6	rs3130281	C	G	G	2.09792	1.76614	2.49202	3.28737e-17	0.02029	-	-
6	rs4540292	T	G	G	0.739393	0.689302	0.793123	3.28901e-17	0.4096	-	-
6	rs113221435	GGTTGA	G	G	0.739421	0.689331	0.79315	3.30626e-17	0.4096	-	-
6	rs9266030	G	A	A	0.739421	0.689331	0.79315	3.30626e-17	0.4096	-	-
6	rs4469339	T	A	A	0.739421	0.689331	0.79315	3.30626e-17	0.4096	-	-
6	rs2395099	T	C	C	2.09772	1.76597	2.49179	3.32144e-17	0.0202	-	-
6	rs5014819	C	T	T	0.739421	0.689328	0.793154	3.32214e-17	0.4096	-	-
6	rs5014818	C	G	G	0.739421	0.689328	0.793154	3.32214e-17	0.4096	-	-
6	rs4530905	C	T	T	0.739421	0.689328	0.793154	3.32214e-17	0.4096	-	-
6	rs4409218	C	A	A	0.739421	0.689328	0.793154	3.32214e-17	0.4096	-	-
6	rs9266022	G	A	A	0.739421	0.689328	0.793154	3.32214e-17	0.4096	-	-
6	rs75437162	TG	T	T	0.739421	0.689328	0.793154	3.32214e-17	0.4097	-	-
6	rs2442752	T	C	C	0.69363	0.637101	0.755174	3.33771e-17	0.2482	-	-
6	rs6149515	GAGCACAGCCTTCACC	G	G	2.26354	1.87211	2.73682	3.36442e-17	0.01509	-	-
6	rs28359837	AG	A	A	2.26335	1.87197	2.73656	3.3778e-17	0.01509	-	-
6	rs113274764	C	T	T	1.54866	1.39895	1.71439	3.40034e-17	0.083	-	-
6	rs2074502	G	A	A	0.675972	0.617147	0.740405	3.45117e-17	0.2146	-	-
6	rs707928	A	G	G	0.732798	0.681692	0.787735	3.49497e-17	0.3717	VWA7	von Willebrand factor A domain containing 7	Novel
6	rs9272324	A	G	G	0.745668	0.696475	0.798335	3.516e-17	0.4676	HLA-DQA1	major histocompatibility complex, class II, DQ alpha 1
6	rs4713328	C	T	T	0.676279	0.617468	0.740692	3.5613e-17	0.2147	-	-
6	rs35368813	CT	C	C	2.32329	1.90961	2.82659	3.57798e-17	0.01367	HLA-DQA2	major histocompatibility complex, class II, DQ alpha 2
6	rs80123563	C	T	T	0.71053	0.656211	0.769345	3.69451e-17	0.2868	-	-
6	rs2523806	C	T	T	1.33547	1.24849	1.42851	3.81355e-17	0.3895	-	-
6	rs12201084	A	T	T	0.67568	0.616738	0.740254	3.81793e-17	0.214	-	-
6	rs4713326	G	C	C	0.67568	0.616738	0.740254	3.81793e-17	0.214	-	-
6	rs2524076	G	A	G	1.33112	1.24536	1.42279	3.84369e-17	0.4512	-	-
6	rs3094680	C	T	C	1.33112	1.24536	1.42279	3.84581e-17	0.4512	-	-
6	rs9391660	A	G	G	1.33956	1.25136	1.43396	3.98866e-17	0.3876	-	-
6	rs2523818	T	G	G	1.33414	1.24746	1.42685	4.07065e-17	0.3929	-	-
6	rs2844820	T	C	C	1.33414	1.24744	1.42687	4.14147e-17	0.3931	HCP5B	HLA complex P5B
6	rs9272343	A	G	G	0.664053	0.603607	0.730551	4.18716e-17	0.2018	HLA-DQA1	major histocompatibility complex, class II, DQ alpha 1
6	rs3096696	C	A	A	2.09235	1.76152	2.48531	4.19088e-17	0.02034	PPT2	palmitoyl-protein thioesterase 2
6	rs9279499	GC	G	G	2.09216	1.76135	2.48509	4.22978e-17	0.02025	-	-
6	rs3130347	T	C	C	2.08397	1.75603	2.47316	4.27163e-17	0.02045	-	-
6	rs4711200	C	T	T	1.33354	1.24694	1.42614	4.36421e-17	0.3907	LOC105375010	uncharacterized LOC105375010
6	rs9272144	T	G	G	0.672497	0.613051	0.737706	4.3724e-17	0.2093	-	-
6	rs62395457	G	A	A	1.33834	1.25036	1.43251	4.44928e-17	0.3308	-	-
6	rs149474621	CTA	C	C	1.40278	1.29616	1.51818	4.79492e-17	0.1787	-	-
6	rs2395471	G	A	A	1.32995	1.24426	1.42154	4.81675e-17	0.4141	HLA-C	major histocompatibility complex, class I, C
6	rs2395224	C	G	G	0.675028	0.615815	0.739935	4.8615e-17	0.2118	-	-
6	rs12204919	G	T	T	2.31506	1.90272	2.81675	4.95613e-17	0.01371	LOC102725019	uncharacterized LOC102725019
6	rs7765903	T	A	A	0.711379	0.656957	0.77031	5.00488e-17	0.2877	-	-
6	rs9394051	G	C	C	1.36269	1.26759	1.46493	5.13277e-17	0.2484	LINC02571	long intergenic non-protein coding RNA 2571
6	rs9295969	G	A	A	1.36269	1.26759	1.46493	5.13323e-17	0.2484	LINC02571	long intergenic non-protein coding RNA 2571
6	rs3873381	T	G	G	1.36269	1.26759	1.46493	5.13323e-17	0.2484	LINC02571	long intergenic non-protein coding RNA 2571
6	rs9394052	C	T	T	1.36269	1.26758	1.46494	5.15364e-17	0.2484	LINC02571	long intergenic non-protein coding RNA 2571
6	rs6939681	T	G	G	1.36267	1.26756	1.46491	5.18006e-17	0.2484	LINC02571	long intergenic non-protein coding RNA 2571
6	rs9357122	T	C	C	1.36267	1.26756	1.46491	5.18006e-17	0.2484	LINC02571	long intergenic non-protein coding RNA 2571
6	rs76141334	TC	T	T	1.36267	1.26756	1.46491	5.18006e-17	0.2484	-	-
6	rs72861464	A	G	G	1.36267	1.26756	1.46491	5.18006e-17	0.2484	-	-
6	rs72861465	G	A	A	1.36267	1.26756	1.46491	5.18006e-17	0.2484	-	-
6	rs17198727	C	T	T	1.36267	1.26756	1.46491	5.18006e-17	0.2484	-	-
6	rs9366776	G	A	A	1.36267	1.26756	1.46491	5.18006e-17	0.2484	-	-
6	rs10947169	T	C	C	1.36267	1.26756	1.46491	5.18006e-17	0.2484	-	-
6	rs9348860	T	C	C	1.36266	1.26755	1.46491	5.18052e-17	0.2484	-	-
6	rs9348861	A	G	G	1.36266	1.26755	1.46491	5.18052e-17	0.2484	-	-
6	rs9368670	C	T	T	1.36266	1.26755	1.46491	5.18052e-17	0.2484	-	-
6	rs9380236	A	G	G	1.36261	1.2675	1.46485	5.23301e-17	0.2484	-	-
6	rs6916525	A	G	G	1.36259	1.26748	1.46483	5.2531e-17	0.2484	LINC02571	long intergenic non-protein coding RNA 2571
6	rs3873382	A	G	G	1.36197	1.26703	1.46404	5.32379e-17	0.2486	LINC02571	long intergenic non-protein coding RNA 2571
6	rs3873377	T	C	C	1.36242	1.26734	1.46464	5.34555e-17	0.2485	-	-
6	rs67497292	A	G	G	2.28734	1.88481	2.77584	5.38871e-17	0.01425	LSM2	LSM2 homolog, U6 small nuclear RNA and mRNA degradation associated	Novel
6	rs17192526	T	C	C	0.739147	0.688684	0.793307	5.40011e-17	0.3974	LINC02571	long intergenic non-protein coding RNA 2571
6	rs7762513	C	T	T	0.683063	0.624781	0.746781	5.44361e-17	0.2236	LINC02571	long intergenic non-protein coding RNA 2571
6	rs75666334	G	A	A	2.30731	1.8973	2.80593	5.49224e-17	0.01355	LINC00243	long intergenic non-protein coding RNA 243
6	rs118029040	C	T	T	2.30731	1.8973	2.80593	5.49224e-17	0.01355	-	-
6	rs11967472	G	A	A	0.704527	0.649084	0.764705	5.52901e-17	0.2673	LINC02571	long intergenic non-protein coding RNA 2571
6	rs707929	A	G	G	0.734888	0.683766	0.789832	5.59809e-17	0.3733	VWA7	von Willebrand factor A domain containing 7	Novel
6	rs72861484	A	T	T	1.36163	1.26662	1.46377	6.0488e-17	0.2487	LINC02571	long intergenic non-protein coding RNA 2571
6	rs11753323	G	A	A	1.54297	1.39381	1.7081	6.22529e-17	0.08328	-	-
6	rs35226447	G	A	A	2.29112	1.88644	2.78261	6.23615e-17	0.01415	SNHG32	small nucleolar RNA host gene 32	Novel
6	rs112087434	C	G	G	2.29112	1.88644	2.78261	6.23615e-17	0.01415	-	-
6	rs9264532	C	T	C	1.32875	1.2431	1.42031	6.23921e-17	0.4344	-	-
6	rs35337578	T	C	C	2.13727	1.78866	2.55383	6.26067e-17	0.01854	-	-
6	rs3905495	G	A	A	0.73952	0.688992	0.793752	6.43381e-17	0.3964	LINC02571	long intergenic non-protein coding RNA 2571
6	rs9265961	A	G	A	0.699984	0.643807	0.761062	6.4449e-17	0.2607	-	-
6	rs9368671	C	T	T	1.36108	1.26613	1.46315	6.51752e-17	0.2486	-	-
6	rs28367685	G	A	A	0.683116	0.624679	0.74702	6.69523e-17	0.2222	LINC02571	long intergenic non-protein coding RNA 2571
6	rs12213612	G	A	A	2.28788	1.88378	2.77867	7.03023e-17	0.01417	-	-
6	rs12206352	C	T	T	2.28788	1.88378	2.77868	7.03216e-17	0.01416	LSM2	LSM2 homolog, U6 small nuclear RNA and mRNA degradation associated	Novel
6	rs58264607	C	A	A	1.54115	1.3922	1.70604	7.42263e-17	0.08316	-	-
6	rs3900938	T	C	C	0.703709	0.647922	0.7643	7.52843e-17	0.2624	-	-
6	rs2523505	C	G	G	2.2492	1.85896	2.72135	7.60726e-17	0.01507	-	-
6	rs2857607	C	T	T	2.2492	1.85896	2.72135	7.60956e-17	0.01507	-	-
6	rs9272333	C	T	T	0.665447	0.604676	0.732326	7.70109e-17	0.2013	HLA-DQA1	major histocompatibility complex, class II, DQ alpha 1
6	rs2518030	A	G	A	1.38566	1.28334	1.49613	7.8115e-17	0.2187	HCP5	HLA complex P5
6	rs9468940	G	C	C	0.706082	0.650576	0.766323	7.99119e-17	0.2676	LINC02571	long intergenic non-protein coding RNA 2571
6	rs9461688	A	G	G	0.706082	0.650576	0.766323	7.99119e-17	0.2676	LINC02571	long intergenic non-protein coding RNA 2571
6	rs9468935	C	T	T	0.706096	0.650592	0.766336	7.99887e-17	0.2676	LINC02571	long intergenic non-protein coding RNA 2571
6	rs28895023	G	A	A	1.48545	1.35336	1.63042	8.18563e-17	0.1079	TSBP1-AS1	TSBP1 and BTNL2 antisense RNA 1
6	rs9280992	G	GT	G	1.34273	1.25276	1.43917	8.24001e-17	0.3458	-	-
6	rs9280993	G	GTCCCAGAA	G	1.34273	1.25276	1.43917	8.24001e-17	0.3458	-	-
6	rs765523874	GT	G	GT	1.34273	1.25276	1.43917	8.24001e-17	0.3458	-	-
6	rs3096697	G	A	A	2.10512	1.76681	2.50822	8.25974e-17	0.01958	EGFL8	EGF like domain multiple 8
6	rs62395260	G	A	A	1.91316	1.64222	2.22881	8.32133e-17	0.02781	MICA	MHC class I polypeptide-related sequence A
6	rs16867712	T	C	C	1.32913	1.243	1.42123	8.54924e-17	0.4055	-	-
6	rs607998	G	A	A	0.675672	0.616077	0.741032	8.66878e-17	0.2089	-	-
6	rs150995694	C	T	T	1.92405	1.64918	2.24473	8.73753e-17	0.0272	-	-
6	rs28652698	G	T	T	1.41437	1.30344	1.53474	8.87198e-17	0.1643	CCHCR1	coiled-coil alpha-helical rod protein 1
6	rs6899660	A	G	G	1.36079	1.26552	1.46323	8.89121e-17	0.2479	-	-
6	rs12212799	G	A	A	2.27013	1.87135	2.75388	8.9446e-17	0.01433	-	-
6	rs9265977	A	G	G	0.707024	0.651544	0.767228	9.16906e-17	0.2839	-	-
6	rs28367591	G	A	A	0.705178	0.649415	0.76573	9.51664e-17	0.264	-	-
6	rs13118	A	T	T	2.24195	1.85326	2.71217	9.51696e-17	0.01529	NEU1	neuraminidase 1	Novel
6	rs4713552	C	T	T	0.679149	0.619904	0.744057	9.71899e-17	0.2132	-	-
6	rs3998182	T	C	C	0.679149	0.619904	0.744057	9.71899e-17	0.2132	-	-
6	rs9270573	T	G	G	0.679149	0.619903	0.744058	9.73539e-17	0.2132	-	-
6	rs9279765	AC	A	A	0.679149	0.619903	0.744058	9.73539e-17	0.2132	-	-
6	rs9270600	C	T	T	0.679149	0.619903	0.744058	9.73539e-17	0.2132	-	-
6	rs9270620	T	A	A	0.679149	0.619903	0.744058	9.73539e-17	0.2132	-	-
6	rs9270623	A	C	C	0.679149	0.619903	0.744058	9.73539e-17	0.2132	-	-
6	rs9280991	C	CCTT	C	1.34174	1.25183	1.43809	9.76851e-17	0.346	-	-
6	rs9262051	A	T	A	1.34174	1.25183	1.43809	9.76851e-17	0.346	-	-
6	rs142639902	TA	T	TA	1.34174	1.25183	1.43809	9.76851e-17	0.346	-	-
6	rs9270662	T	G	G	0.679185	0.619936	0.744096	9.81579e-17	0.2132	-	-
6	rs9270665	G	T	T	0.679215	0.619964	0.744128	9.88423e-17	0.2132	-	-
6	rs4599680	T	C	C	0.679226	0.619975	0.744139	9.9091e-17	0.2132	-	-
6	rs3957140	G	A	A	0.679235	0.619984	0.744149	9.92483e-17	0.2132	-	-
6	rs9270493	T	C	C	0.679341	0.620079	0.744265	1.0218e-16	0.2132	HLA-DRB1	major histocompatibility complex, class II, DR beta 1
6	rs2524035	A	G	A	0.610678	0.543522	0.686131	1.06518e-16	0.1358	-	-
6	rs28367597	C	G	G	0.705732	0.649957	0.766294	1.06807e-16	0.2643	LINC02571	long intergenic non-protein coding RNA 2571
6	rs7754903	G	T	T	0.705732	0.649957	0.766294	1.06807e-16	0.2643	-	-
6	rs6921855	T	C	C	1.35961	1.26444	1.46195	1.07027e-16	0.2478	-	-
6	rs7739937	G	C	C	0.625763	0.560156	0.699055	1.08021e-16	0.1475	-	-
6	rs2233972	T	C	C	1.40643	1.29751	1.52449	1.10605e-16	0.1681	C6orf15	chromosome 6 open reading frame 15
6	rs9378152	C	G	G	1.40578	1.29702	1.52365	1.12566e-16	0.1684	-	-
6	rs9348863	T	C	C	1.35844	1.26354	1.46048	1.12767e-16	0.2487	LINC02571	long intergenic non-protein coding RNA 2571
6	rs9270868	A	G	G	0.679686	0.620388	0.744652	1.12955e-16	0.2132	-	-
6	rs118179173	T	A	A	1.92267	1.64734	2.24402	1.13101e-16	0.02701	-	-
6	rs590999	G	A	A	0.679757	0.620456	0.744726	1.14669e-16	0.2132	-	-
6	rs1029239	C	G	G	1.32995	1.24322	1.42273	1.16131e-16	0.3588	TRIM15	tripartite motif containing 15
6	rs2507993	C	T	C	1.32747	1.24139	1.41952	1.2176e-16	0.3831	-	-
6	rs2734957	A	G	G	1.32928	1.24268	1.42193	1.22764e-16	0.4147	-	-
6	rs11962863	A	G	G	1.921	1.64595	2.24202	1.22856e-16	0.02715	-	-
6	rs34085630	A	C	C	2.34055	1.91353	2.86287	1.29375e-16	0.01278	TAP2	transporter 2, ATP binding cassette subfamily B member
6	rs2256902	G	A	A	0.607199	0.539517	0.683371	1.29654e-16	0.1329	-	-
6	rs3778620	A	G	G	1.4126	1.30153	1.53314	1.36411e-16	0.1884	-	-
6	rs2523491	T	C	C	1.3307	1.24356	1.42395	1.3645e-16	0.3352	-	-
6	rs2244026	G	T	T	1.33068	1.24354	1.42393	1.36868e-16	0.3352	-	-
6	rs143804865	T	A	A	1.4055	1.29653	1.52362	1.37094e-16	0.1724	TUBB	tubulin beta class I	Novel
6	rs7759482	A	G	G	1.32632	1.24043	1.41816	1.37236e-16	0.4021	-	-
6	rs2244027	A	G	G	1.33056	1.24343	1.4238	1.3937e-16	0.3352	-	-
6	rs2523969	A	T	T	0.616886	0.550116	0.691761	1.39686e-16	0.1401	-	-
6	rs12153855	T	C	C	2.07949	1.74786	2.47405	1.46265e-16	0.01988	TNXB	tenascin XB
6	rs4713244	G	A	A	1.33023	1.24312	1.42344	1.482e-16	0.402	-	-
6	rs116257651	T	C	C	2.23891	1.84903	2.711	1.50001e-16	0.01459	-	-
6	rs115907063	C	A	A	2.23891	1.84903	2.711	1.50001e-16	0.01459	-	-
6	rs138661409	AT	A	A	2.23891	1.84903	2.711	1.50001e-16	0.01459	-	-
6	rs148419406	G	A	A	2.23891	1.84903	2.711	1.50001e-16	0.01459	-	-
6	rs114224709	G	C	C	2.23879	1.84892	2.71087	1.50953e-16	0.01459	MUC22	mucin 22
6	rs9266689	A	G	A	1.3387	1.24912	1.4347	1.51736e-16	0.2974	-	-
6	rs2844536	A	G	A	1.3387	1.24912	1.43471	1.52497e-16	0.2974	-	-
6	rs200145106	TA	T	T	1.33267	1.2448	1.42675	1.55422e-16	0.3312	-	-
6	rs144182047	A	T	T	2.04744	1.72692	2.42744	1.59008e-16	0.02053	-	-
6	rs12193504	C	T	T	2.23218	1.84429	2.70166	1.65487e-16	0.01522	-	-
6	rs2076175	G	A	A	1.32556	1.23963	1.41746	1.70264e-16	0.4051	HLA-F-AS1	HLA-F antisense RNA 1	Novel
6	rs7739434	G	A	G	0.61289	0.545472	0.68864	1.81048e-16	0.135	-	-
6	rs16899168	G	A	A	0.641028	0.576567	0.712697	1.9744e-16	0.1607	-	-
6	rs7759474	C	T	T	1.32433	1.23856	1.41605	1.99311e-16	0.4021	-	-
6	rs9263460	C	T	T	1.37166	1.27211	1.479	2.0192e-16	0.2232	-	-
6	rs151331851	G	A	A	2.04228	1.72256	2.42135	2.03238e-16	0.02061	-	-
6	rs2394164	G	C	C	1.32461	1.23873	1.41644	2.03816e-16	0.4103	-	-
6	rs2523961	G	A	A	0.612501	0.544911	0.688475	2.08868e-16	0.1351	-	-
6	rs34260811	C	A	A	1.32571	1.23946	1.41795	2.12216e-16	0.4037	HLA-F-AS1	HLA-F antisense RNA 1	Novel
6	rs2233973	G	C	C	1.36217	1.26529	1.46647	2.19334e-16	0.2297	C6orf15	chromosome 6 open reading frame 15
6	rs17189889	G	A	A	2.2264	1.83902	2.69539	2.27425e-16	0.01463	MUC21	mucin 21, cell surface associated
6	chr6:32374066_CTTGT_C	CTTGT	C	C	1.46816	1.33948	1.6092	2.30006e-16	0.1122	-	-
6	rs9378202	T	C	C	1.46817	1.33947	1.60924	2.32997e-16	0.1122	-	-
6	rs142104663	G	GT	GT	2.21073	1.8289	2.67228	2.39457e-16	0.01488	-	-
6	rs114945721	A	G	G	1.53717	1.387	1.7036	2.45827e-16	0.08134	-	-
6	rs9391858	A	G	G	1.46753	1.3389	1.60852	2.49763e-16	0.1123	-	-
6	rs3130284	T	C	C	2.07888	1.74505	2.47658	2.52327e-16	0.01979	AGPAT1	1-acylglycerol-3-phosphate O-acyltransferase 1	Novel
6	rs17193507	G	T	T	2.1533	1.79227	2.58705	2.57896e-16	0.01679	-	-
6	rs28380844	A	C	C	1.40616	1.29599	1.5257	2.64186e-16	0.1709	-	-
6	rs9260102	C	A	A	0.618358	0.551146	0.693766	2.66371e-16	0.1385	HLA-A	major histocompatibility complex, class I, A
6	rs41272547	C	A	A	0.609506	0.54135	0.686243	2.76448e-16	0.1316	HLA-A	major histocompatibility complex, class I, A
6	rs3020581	G	A	G	1.32115	1.23588	1.4123	2.79987e-16	0.4021	-	-
6	rs2905714	T	C	T	1.32115	1.23588	1.41229	2.80013e-16	0.4021	-	-
6	rs66703876	GGT	G	GGT	0.625083	0.558531	0.699565	2.82247e-16	0.1433	HCG9	HLA complex group 9
6	rs116507489	G	C	G	0.625083	0.558531	0.699565	2.82247e-16	0.1433	HCG9	HLA complex group 9
6	rs2256820	G	A	A	0.620075	0.552988	0.695302	2.82936e-16	0.1397	-	-
6	rs2523967	G	C	C	0.620075	0.552986	0.695304	2.83438e-16	0.1397	-	-
6	rs55756482	CTGA	C	C	1.36088	1.26402	1.46517	2.85515e-16	0.2297	-	-
6	rs9263477	G	A	A	1.36088	1.26402	1.46517	2.85515e-16	0.2297	-	-
6	rs9263499	T	C	C	1.36045	1.2637	1.46461	2.8952e-16	0.2299	-	-
6	rs2894179	C	A	A	1.36045	1.2637	1.46461	2.8952e-16	0.2299	-	-
6	rs9263512	G	T	T	1.36045	1.2637	1.46461	2.8952e-16	0.2299	-	-
6	rs9278969	GT	G	G	1.36045	1.2637	1.46461	2.8952e-16	0.2299	-	-
6	rs9263578	A	G	G	1.36045	1.2637	1.46461	2.8952e-16	0.2299	-	-
6	rs1611741	C	A	A	1.32164	1.23617	1.41301	2.94364e-16	0.4193	-	-
6	rs3129770	G	A	G	0.752422	0.702816	0.805529	2.96736e-16	0.4778	-	-
6	rs9258946	G	A	G	0.613476	0.545642	0.689744	3.01588e-16	0.1337	HCP5B	HLA complex P5B
6	rs3132713	A	C	A	0.613481	0.545646	0.689748	3.01696e-16	0.1337	HCP5B	HLA complex P5B
6	rs56213322	AT	A	AT	0.613481	0.545646	0.689748	3.01696e-16	0.1337	HCP5B	HLA complex P5B
6	rs3087959	A	G	A	0.613473	0.545624	0.68976	3.06196e-16	0.1338	HCP5B	HLA complex P5B
6	rs12215107	G	A	A	2.0776	1.74335	2.47594	3.07086e-16	0.01963	ATF6B	activating transcription factor 6 beta	Novel
6	rs9391734	G	A	A	2.0776	1.74335	2.47594	3.07086e-16	0.01963	-	-
6	rs9263572	C	A	A	1.36015	1.26338	1.46433	3.12239e-16	0.2298	-	-
6	rs28732174	C	A	A	2.07706	1.74291	2.47526	3.13246e-16	0.01963	-	-
6	rs3819683	C	T	T	1.39462	1.28763	1.51049	3.1352e-16	0.1802	-	-
6	rs28383250	A	T	T	2.06336	1.73412	2.4551	3.16535e-16	0.02075	-	-
6	rs1632938	G	A	G	1.32482	1.23832	1.41736	3.2258e-16	0.3918	HLA-G	major histocompatibility complex, class I, G
6	rs2227956	G	A	G	1.37094	1.27094	1.47882	3.24393e-16	0.2091	HSPA1L	heat shock protein family A (Hsp70) member 1 like
6	rs2107197	C	T	T	1.32106	1.23563	1.41241	3.27874e-16	0.4191	LOC105375010	uncharacterized LOC105375010
6	rs4713242	G	A	A	1.32166	1.23603	1.41322	3.3364e-16	0.4107	-	-
6	rs2394662	A	G	G	1.32175	1.23608	1.41336	3.3856e-16	0.4079	-	-
6	rs9260083	A	C	C	0.619885	0.552598	0.695364	3.42465e-16	0.1386	HLA-A	major histocompatibility complex, class I, A
6	rs9260085	G	A	A	0.619885	0.552598	0.695364	3.42465e-16	0.1386	HLA-A	major histocompatibility complex, class I, A
6	rs9260088	C	A	A	0.619885	0.552598	0.695364	3.42465e-16	0.1386	HLA-A	major histocompatibility complex, class I, A
6	rs9260089	C	T	T	0.619885	0.552598	0.695364	3.42465e-16	0.1386	HLA-A	major histocompatibility complex, class I, A
6	rs9260090	T	C	C	0.619885	0.552598	0.695364	3.42465e-16	0.1386	HLA-A	major histocompatibility complex, class I, A
6	rs9260100	A	G	G	0.619885	0.552598	0.695364	3.42465e-16	0.1386	HLA-A	major histocompatibility complex, class I, A
6	rs9260052	C	T	T	0.619885	0.552598	0.695364	3.42465e-16	0.1386	-	-
6	rs373292445	A	T	T	0.716915	0.66182	0.776595	3.42811e-16	0.2838	-	-
6	rs139775092	AAAAC	A	A	2.24207	1.8467	2.72208	3.42849e-16	0.01398	MDC1	mediator of DNA damage checkpoint 1	Novel
6	rs149544264	G	A	A	2.24207	1.8467	2.72208	3.42849e-16	0.01398	-	-
6	rs56212767	C	T	T	2.24207	1.8467	2.72208	3.42849e-16	0.01398	-	-
6	rs4544940	G	C	C	1.32399	1.23765	1.41635	3.43912e-16	0.3853	-	-
6	rs3117572	A	G	A	1.35514	1.25969	1.45781	3.47029e-16	0.2357	-	-
6	rs28732176	C	T	T	2.07471	1.74094	2.47247	3.47922e-16	0.01964	FKBPL	FKBP prolyl isomerase like
6	rs370377	A	G	G	0.619928	0.552626	0.695426	3.49796e-16	0.1386	-	-
6	rs403002	C	A	A	0.619929	0.552627	0.695427	3.49903e-16	0.1386	-	-
6	rs2523808	T	C	C	2.05373	1.72735	2.44178	3.63935e-16	0.02018	-	-
6	rs7765136	G	A	A	2.21311	1.82824	2.67899	3.64094e-16	0.01533	-	-
6	chr6:29956007_A_ATAAC	A	ATAAC	ATAAC	0.62044	0.553129	0.695943	3.74192e-16	0.1388	-	-
6	rs9265912	T	C	T	0.730747	0.677617	0.788043	3.79582e-16	0.3318	-	-
6	rs9368660	G	A	A	1.39303	1.28622	1.50871	3.82607e-16	0.1749	-	-
6	rs7754067	C	T	T	1.32087	1.2353	1.41237	3.83466e-16	0.4051	-	-
6	rs60557285	G	A	A	2.2383	1.84364	2.71746	3.92029e-16	0.01401	DHX16	DEAH-box helicase 16	Novel
6	rs10947087	G	A	A	2.24614	1.84853	2.72927	3.92459e-16	0.0139	-	-
6	rs3130348	C	A	A	2.07259	1.73902	2.47015	3.94597e-16	0.01961	AGPAT1	1-acylglycerol-3-phosphate O-acyltransferase 1	Novel
6	rs3131297	A	T	T	2.07259	1.73902	2.47015	3.94597e-16	0.01961	AGPAT1	1-acylglycerol-3-phosphate O-acyltransferase 1	Novel
6	rs9267816	T	C	C	2.07259	1.73902	2.47015	3.94597e-16	0.01961	-	-
6	rs115694430	T	G	G	0.612183	0.543947	0.688978	4.00027e-16	0.1323	-	-
6	rs35333729	G	T	T	0.612107	0.543857	0.688921	4.02647e-16	0.1319	HLA-A	major histocompatibility complex, class I, A
6	rs72498365	G	C	C	0.612157	0.543902	0.688977	4.07023e-16	0.1319	HLA-A	major histocompatibility complex, class I, A
6	rs74218766	C	T	T	0.612157	0.543902	0.688977	4.07023e-16	0.1319	HLA-A	major histocompatibility complex, class I, A
6	rs114157794	T	G	G	0.612157	0.543902	0.688977	4.07023e-16	0.1319	HLA-A	major histocompatibility complex, class I, A
6	rs201477120	A	G	G	0.612198	0.543932	0.689031	4.13657e-16	0.1319	-	-
6	rs74211750	A	G	G	0.612199	0.543933	0.689034	4.13975e-16	0.1319	-	-
6	rs114058671	G	A	A	0.612216	0.543945	0.689056	4.16729e-16	0.1319	-	-
6	rs9391817	C	T	T	1.4022	1.29251	1.52121	4.17392e-16	0.1649	PSORS1C3	psoriasis susceptibility 1 candidate 3
6	rs2272592	T	C	T	1.35429	1.25884	1.45698	4.19403e-16	0.2349	-	-
6	rs6904786	C	A	A	2.07403	1.73959	2.47276	4.25538e-16	0.01959	-	-
6	rs4713239	G	A	A	1.32028	1.23475	1.41174	4.27805e-16	0.4052	-	-
6	rs2844825	T	G	G	1.31876	1.23366	1.40974	4.31539e-16	0.4211	-	-
6	rs9393949	A	T	T	1.58345	1.41727	1.76911	4.47532e-16	0.07078	-	-
6	rs4713439	A	G	G	1.39122	1.2847	1.50657	4.49508e-16	0.1758	PSORS1C3	psoriasis susceptibility 1 candidate 3
6	rs408206	G	A	A	0.621401	0.55401	0.696989	4.53296e-16	0.1388	HCG9	HLA complex group 9
6	rs2233954	G	A	A	0.715858	0.660389	0.775986	4.53878e-16	0.2794	-	-
6	rs1611726	A	G	G	1.31974	1.23426	1.41113	4.63567e-16	0.4186	-	-
6	chr6:30732140_A_AT	A	AT	AT	2.24131	1.84457	2.72339	4.67742e-16	0.01391	-	-
6	rs17189364	G	A	A	2.24102	1.84438	2.72296	4.68419e-16	0.01392	TUBB	tubulin beta class I	Novel
6	rs1062411	C	T	T	2.24123	1.84451	2.72328	4.68892e-16	0.01391	TUBB	tubulin beta class I	Novel
6	rs28732150	G	A	A	1.35415	1.25858	1.45697	4.71536e-16	0.2341	AIF1	allograft inflammatory factor 1
6	rs9405015	C	T	T	1.39131	1.28467	1.50681	4.78369e-16	0.1751	-	-
6	rs144947541	CCT	C	C	1.39131	1.28467	1.50681	4.78369e-16	0.1751	-	-
6	rs9378226	A	G	G	1.39131	1.28467	1.50681	4.78369e-16	0.1751	-	-
6	rs9260368	G	A	A	0.621878	0.55448	0.697467	4.81724e-16	0.1386	-	-
6	rs4122190	A	G	G	1.39067	1.28418	1.50599	4.91066e-16	0.1753	HCG27	HLA complex group 27
6	rs9265986	C	T	T	0.716795	0.661398	0.776832	4.92186e-16	0.2855	-	-
6	rs9265987	T	C	C	0.716795	0.661398	0.776832	4.92186e-16	0.2855	-	-
6	rs9266721	C	A	C	1.33222	1.24303	1.42782	4.94196e-16	0.3002	-	-
6	rs34190775	T	TA	TA	0.693996	0.635374	0.758027	4.95514e-16	0.2288	-	-
6	rs79231337	G	C	C	0.610813	0.54222	0.688084	5.01645e-16	0.1319	HLA-A	major histocompatibility complex, class I, A
6	rs17180241	C	A	A	0.616863	0.548895	0.693248	5.02181e-16	0.1349	-	-
6	rs6924575	A	G	G	0.690452	0.631321	0.755121	5.11523e-16	0.2213	-	-
6	rs117333063	C	A	A	1.39029	1.28385	1.50556	5.12738e-16	0.1753	HCG27	HLA complex group 27
6	rs2073148	T	C	C	0.633104	0.566872	0.707074	5.14567e-16	0.1475	OR2H1	olfactory receptor family 2 subfamily H member 1	Novel
6	rs12213851	T	C	C	2.07506	1.73934	2.47558	5.19183e-16	0.01951	-	-
6	rs2280801	C	T	T	1.35365	1.25808	1.45647	5.22127e-16	0.2342	PRRC2A	proline rich coiled-coil 2A	Novel
6	rs7772153	G	A	A	1.39069	1.2841	1.50614	5.23817e-16	0.1752	-	-
6	rs57817411	A	C	C	2.22696	1.83496	2.70271	5.27974e-16	0.01396	-	-
6	rs9391731	C	A	A	1.35448	1.25866	1.4576	5.28104e-16	0.233	BAG6	BAG cochaperone 6	Novel
6	rs9265984	C	T	T	0.717207	0.661805	0.777247	5.33759e-16	0.2856	-	-
6	rs2097432	T	C	C	0.680337	0.619819	0.746765	5.35187e-16	0.2095	-	-
6	rs4713240	A	G	G	1.31862	1.23329	1.40985	5.36109e-16	0.4085	HLA-F-AS1	HLA-F antisense RNA 1	Novel
6	rs3130277	G	C	C	2.07406	1.73844	2.47447	5.49151e-16	0.01948	-	-
6	rs10947038	G	A	A	0.61369	0.545305	0.690651	5.49237e-16	0.1316	-	-
6	rs6935569	C	T	T	2.17271	1.80075	2.62149	5.50796e-16	0.01611	-	-
6	rs144229847	T	A	A	2.17271	1.80075	2.62149	5.50796e-16	0.01611	-	-
6	rs6935575	C	T	T	2.17271	1.80075	2.62149	5.50796e-16	0.01611	-	-
6	rs72500497	C	T	T	0.613347	0.544923	0.690362	5.50962e-16	0.1313	-	-
6	rs11757135	C	T	T	0.613346	0.544922	0.690362	5.5128e-16	0.1313	-	-
6	rs17179957	T	A	A	0.613392	0.544964	0.690413	5.563e-16	0.1313	-	-
6	rs2442751	G	A	G	1.31702	1.23209	1.4078	5.63288e-16	0.4048	-	-
6	rs16894919	G	T	T	0.633551	0.567274	0.707572	5.69797e-16	0.1474	-	-
6	rs77309262	C	T	T	0.614235	0.545862	0.691171	5.74809e-16	0.132	-	-
6	rs2523815	A	G	G	1.31784	1.23263	1.40893	5.83034e-16	0.4204	HCP5B	HLA complex P5B
6	rs2107189	G	A	A	0.630208	0.563535	0.704769	5.83624e-16	0.1442	LOC105375008	uncharacterized LOC105375008
6	rs11315966	CA	C	C	1.31866	1.2332	1.41004	5.88861e-16	0.4078	HLA-F-AS1	HLA-F antisense RNA 1	Novel
6	rs12663276	A	G	G	0.613796	0.545349	0.690835	5.9238e-16	0.1308	-	-
6	rs9378164	G	A	A	1.3537	1.25792	1.45677	6.02863e-16	0.2317	-	-
6	rs117588763	C	T	T	1.38974	1.28321	1.50511	6.04314e-16	0.1752	PSORS1C3	psoriasis susceptibility 1 candidate 3
6	rs9357114	T	G	G	1.38974	1.28321	1.50511	6.04314e-16	0.1752	-	-
6	rs9348855	A	C	C	1.38974	1.28321	1.50511	6.04314e-16	0.1752	-	-
6	rs7771486	G	C	C	1.38974	1.28321	1.50511	6.04314e-16	0.1752	-	-
6	rs114839838	G	A	A	0.614514	0.546117	0.691477	6.07206e-16	0.1318	-	-
6	rs116001094	T	C	C	0.614514	0.546117	0.691477	6.07206e-16	0.1318	-	-
6	rs79857957	C	T	T	0.614514	0.546116	0.691478	6.07715e-16	0.1318	-	-
6	rs78993465	G	A	A	0.614514	0.546116	0.691478	6.07715e-16	0.1318	-	-
6	rs150979551	AGGGCT	A	A	0.623451	0.555999	0.699085	6.08279e-16	0.1389	HCG9	HLA complex group 9
6	rs1128306	G	A	A	0.62345	0.555998	0.699086	6.08797e-16	0.1389	HCG9	HLA complex group 9
6	rs111649188	T	C	C	0.633911	0.567593	0.707978	6.21013e-16	0.1475	-	-
6	rs1611364	T	C	T	0.598532	0.528482	0.677867	6.35986e-16	0.12	-	-
6	rs2975031	A	G	A	0.65909	0.595713	0.729209	6.36824e-16	0.1715	-	-
6	rs10456396	C	A	A	2.35327	1.91211	2.89621	6.4873e-16	0.01207	-	-
6	rs2734974	A	G	G	2.04534	1.71941	2.43306	6.4956e-16	0.02019	-	-
6	rs2517826	G	A	A	2.04534	1.71941	2.43306	6.4956e-16	0.02019	-	-
6	rs5875224	CAG	C	C	0.623864	0.556381	0.699533	6.59119e-16	0.1392	HCG9	HLA complex group 9
6	rs35802713	G	T	T	1.35596	1.25939	1.45994	6.59747e-16	0.229	-	-
6	rs453375	G	A	A	0.623865	0.556378	0.699537	6.60888e-16	0.1392	HCG9	HLA complex group 9
6	rs2232238	T	C	C	0.623865	0.556378	0.699537	6.60888e-16	0.1392	HCG9	HLA complex group 9
6	rs2233983	C	G	G	1.35588	1.2593	1.45986	6.72081e-16	0.2293	C6orf15	chromosome 6 open reading frame 15
6	rs4495304	T	C	C	1.35588	1.2593	1.45986	6.72081e-16	0.2293	-	-
6	rs2734964	C	G	G	2.0445	1.71871	2.43205	6.73645e-16	0.02018	HCP5B	HLA complex P5B
6	rs28544296	T	C	C	0.610205	0.541262	0.68793	6.73826e-16	0.1291	-	-
6	rs117560270	C	T	T	2.22809	1.83423	2.70652	6.90244e-16	0.01388	LINC00243	long intergenic non-protein coding RNA 243
6	rs3134952	A	T	T	2.06832	1.7337	2.46751	6.96101e-16	0.01952	-	-
6	rs2021163	G	C	C	0.615208	0.546741	0.69225	7.03401e-16	0.1317	-	-
6	rs67850286	T	C	C	2.14526	1.78223	2.58223	7.08179e-16	0.01667	-	-
6	rs764554	C	A	A	0.692288	0.633126	0.756978	7.11394e-16	0.221	-	-
6	rs3095307	G	C	G	0.740224	0.688065	0.796337	7.11416e-16	0.3591	PSORS1C1	psoriasis susceptibility 1 candidate 1
6	rs9267577	T	C	T	1.36742	1.26732	1.47542	7.15887e-16	0.2087	-	-
6	rs72860306	C	T	T	1.39244	1.28482	1.50907	7.22242e-16	0.1704	-	-
6	rs71565350	C	A	A	2.31137	1.88557	2.83334	7.32164e-16	0.01276	-	-
6	rs144441042	C	T	T	2.22656	1.83289	2.70477	7.40901e-16	0.01392	HCG20	HLA complex group 20	Novel
6	rs1049622	C	T	C	0.748941	0.698113	0.803471	7.49077e-16	0.4024	DDR1	discoidin domain receptor tyrosine kinase 1	Novel
6	rs28483421	C	T	T	1.38764	1.28138	1.50271	7.63983e-16	0.1756	HCG27	HLA complex group 27
6	rs57553727	ATGTGCGGTTC	A	A	0.630224	0.563285	0.705117	7.72349e-16	0.1433	-	-
6	rs3734854	G	A	A	1.35484	1.25837	1.4587	7.74881e-16	0.2302	C6orf15	chromosome 6 open reading frame 15
6	rs2233970	C	G	G	1.3541	1.25784	1.45772	7.79091e-16	0.2314	C6orf15	chromosome 6 open reading frame 15
6	rs12528253	G	A	A	0.612737	0.54391	0.690273	7.80917e-16	0.1298	LOC105375010	uncharacterized LOC105375010
6	rs1611632	C	T	T	2.04121	1.71594	2.42813	7.82814e-16	0.02018	-	-
6	rs3131384	G	C	G	1.3505	1.2553	1.45291	7.85235e-16	0.2362	-	-
6	rs6914412	T	C	C	2.2063	1.81992	2.67471	7.88792e-16	0.01505	VWA7	von Willebrand factor A domain containing 7	Novel
6	rs28383267	A	G	G	2.02753	1.70716	2.40803	7.96146e-16	0.02105	-	-
6	rs28383269	T	C	C	2.02753	1.70716	2.40803	7.96146e-16	0.02105	-	-
6	rs16894948	G	A	A	0.63567	0.569314	0.709759	7.96189e-16	0.1476	-	-
6	rs9380266	A	C	C	1.35091	1.25557	1.45349	7.98061e-16	0.2342	-	-
6	rs9404941	T	C	C	1.35091	1.25555	1.45351	8.06391e-16	0.2342	-	-
6	rs9380219	C	T	T	1.3552	1.25856	1.45928	8.15779e-16	0.2293	-	-
6	rs35401729	G	A	A	0.694733	0.635789	0.759142	8.16395e-16	0.2265	-	-
6	rs9357112	A	G	G	1.38765	1.28128	1.50285	8.18814e-16	0.1754	-	-
6	rs4713431	G	A	A	1.35489	1.25833	1.45887	8.2118e-16	0.2292	-	-
6	rs2021164	A	T	T	0.692262	0.632972	0.757106	8.22859e-16	0.221	-	-
6	rs9267649	A	G	A	1.36585	1.26602	1.47356	8.23498e-16	0.2079	-	-
6	rs4713322	T	C	C	0.692262	0.632967	0.757112	8.27156e-16	0.221	-	-
6	rs12206377	A	G	G	2.35451	1.91138	2.90038	8.31837e-16	0.01201	HLA-DMB	major histocompatibility complex, class II, DM beta
6	rs12196639	G	C	C	2.35447	1.91134	2.90033	8.33578e-16	0.01199	BRD2	bromodomain containing 2
6	rs77997154	C	T	T	0.615635	0.547043	0.692827	8.35665e-16	0.1329	HLA-A	major histocompatibility complex, class I, A
6	rs10947135	A	T	T	1.35466	1.25813	1.4586	8.42203e-16	0.2292	-	-
6	rs77161679	G	C	C	0.645545	0.580269	0.718165	8.51252e-16	0.1622	HLA-A	major histocompatibility complex, class I, A
6	rs17179816	C	T	T	0.61584	0.547243	0.693036	8.58854e-16	0.1316	-	-
6	rs9295949	C	A	A	1.35457	1.25803	1.45852	8.64099e-16	0.2293	-	-
6	rs9295950	C	T	T	1.35457	1.25803	1.45852	8.64099e-16	0.2293	-	-
[truncated: 6,587 more rows]
